# Supplementary material for: Asymmetric assembly of 2-oxindole and α-angelica lactone units to construct vicinal quaternary chiral centers
Source: Royal Society of Chemistry journal article supplement (doi:10.1039/c2cc17777c), 2012-01-01
Supplement: c2cc17777c.pdf [file c2cc17777c.pdf]

# **Asymmetric Assembly of 2-Oxindole and $\alpha$ -Angelica Lactone Units to Construct Vicinal Quaternary Chiral Centers**

Xin Huang,<sup>a</sup> Jin Peng,<sup>a</sup> Lin Dong,<sup>a</sup> and Ying-Chun Chen<sup>\*a,b</sup>

<sup>a</sup> Key Laboratory of Drug-Targeting and Drug Delivery System of the Education Ministry, Department of Medicinal Chemistry, West China School of Pharmacy, Sichuan University, Chengdu 610041, China, <sup>b</sup> State Key Laboratory of Biotherapy, West China Hospital, Sichuan University, Chengdu 610041, China.

E-mail: ycchenhuaxi@yahoo.com.cn

## **Supplementary Information**

### **Table of Contents**

- 1. General methods**
- 2. The proposed catalytic mechanism**
- 3. General procedure for assembly of MBH carbonates and  $\alpha$ -angelica lactone**
- 4. Crystal data and structure refinement for enantiopure 4a**
- 5. NMR spectra and HPLC chromatograms**

## 1. General Methods

NMR spectra were recorded with tetramethylsilane as the internal standard. TLC was performed on glass-backed silica plates. Column chromatography was performed using silica gel (200-300 mesh) eluting with ethyl acetate, acetone, ethyl ether and petroleum ether (PE) (EtOAc/PE, Acetone/PE or ethyl ether/PE).  $^1\text{H}$  NMR spectra were recorded at 400 MHz (Varian) and  $^{13}\text{C}$  NMR spectra were recorded at 100 MHz (Varian). Chemical shifts are reported in ppm downfield from  $\text{CDCl}_3$  ( $\delta = 7.27$  ppm) for  $^1\text{H}$  NMR and relative to the central  $\text{CDCl}_3$  resonance ( $\delta = 77.0$  ppm) for  $^{13}\text{C}$  NMR spectroscopy. Coupling constants are given in Hz. Optical rotations were measured at 589 nm at 20 °C. Enantiomeric excess was determined by HPLC analysis on Chiralpak AD, AS and Chiralcel OD columns. Mesitylene was distilled from  $\text{CaH}_2$ . All other chemicals were used without purification as commercially available. Catalysts **1a–1f**<sup>1</sup> were prepared according to the literature procedures. Morita–Baylis–Hillman carbonates of isatins<sup>2</sup> and  $\alpha$ -angelica lactone<sup>3</sup> were prepared according to the literature procedures.

(1) (a) H. Waldmann, V. Khedkar, H. Dücker, M. Schürmann, I. M. Oppel and K. Kumar, *Angew. Chem., Int. Ed.* 2008, **47**, 6869; (b) J. Peng, X. Huang, L. Jiang, H.-L. Cui and Y.-C. Chen, *Org. Lett.*, 2011, **13**, 4584.

(2) Y. M. Chung, Y. J. Im and J. N. Kim, *Bull. Korean Chem. Soc.* 2002, **23**, 1651.

(3) J. A. Marshall, M. A. Wolf and E. M. Wallace, *J. Org. Chem.* 1997, **62**, 367.

## 2. The proposed catalytic mechanism

As showing in the following scheme, the tertiary amine catalyst could attack the MBH carbonate **2**, which would generate the ammonium ion **I** and *t*-butoxy anion. Subsequently, the strong Brønsted base would deprotonate the acidic C-H of  $\alpha$ -angelica lactone **3a**, affording the anion **II**. Then, the isomerized anion **III** would attack the electrophilic ion **I** to deliver the allylic product **4** after the elimination of the tertiary amine catalyst.

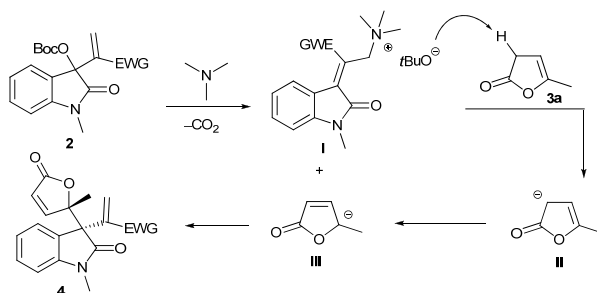

### 3. General procedure for assembly of MBH carbonates and $\alpha$ -angelica lactone

To a solution of MBH carbonate **2** (34.7 mg, 0.1 mmol),  $\alpha$ -angelica lactone **3a** (19.6 mg, 0.2 mmol), 4Å MS (20 mg) and R-BINOL (3.0 mg) in mesitylene (0.5 mL) was added catalyst **1a** (3.2 mg, 10 mol%) at -10 °C. The mixture was kept at the temperature until the consumption of **2a**, which was monitored by TLC analysis. Purification by flash chromatography on silica gel (AcOEt/petroleum ether = 1:5) gave **4**.

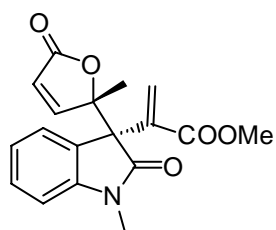

**4a**, 80% yield;  $[\alpha]_D^{20} = +8.5$  ( $c = 0.4$  in  $\text{CHCl}_3$ ); 90% ee, determined by HPLC analysis [Daicel Chiralcel OD,  $n$ -hexane/ $i$ -PrOH = 80/20, 1.0 mL/min,  $\lambda = 254$  nm,  $t$  (major) = 26.532 min,  $t$  (minor) = 18.793 min.];  $^1\text{H}$  NMR (400 MHz,  $\text{CDCl}_3$ ):  $\delta = 7.26$  (t,  $J = 7.6$  Hz, 1H), 7.13 (d,  $J = 7.2$  Hz, 1H), 7.06 (d,  $J = 5.6$  Hz, 1H), 6.96 (t,  $J = 7.6$  Hz, 1H), 6.84 (s, 1H), 6.79 (d,  $J = 7.6$  Hz, 1H), 6.75 (s, 1H), 5.70 (d,  $J = 5.6$  Hz, 1H), 3.62 (s, 3H), 3.29 (s, 3H), 1.88 (s, 3H) ppm;  $^{13}\text{C}$  NMR (100 MHz,  $\text{CDCl}_3$ ):  $\delta = 175.6$ , 171.6, 165.6, 157.1, 143.6, 136.9, 131.1, 129.2, 127.1, 125.0, 122.7, 122.4, 108.1, 89.7, 59.9, 52.3, 26.6, 19.1 ppm; ESI-HRMS: calcd. for  $\text{C}_{18}\text{H}_{17}\text{NO}_5 + \text{Na}$  350.1004, found 350.1002.

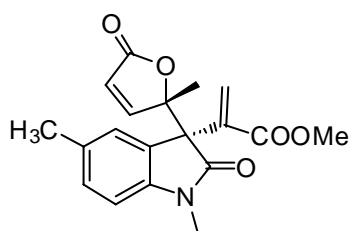

**4d**, 90% yield;  $[\alpha]_D^{20} = +41.0$  ( $c = 0.4$  in  $\text{CHCl}_3$ ); 91% ee, determined by HPLC analysis [Daicel Chiralcel OD,  $n$ -hexane/ $i$ -PrOH = 80/20, 1.0 mL/min,  $\lambda = 254$  nm,  $t$  (major) = 15.910 min,  $t$  (minor) = 8.967 min.];  $^1\text{H}$  NMR (400 MHz,  $\text{CDCl}_3$ ):  $\delta = 7.04$  (d,  $J = 5.6$  Hz, 1H), 7.03 (d,  $J = 8.0$  Hz, 1H), 6.93 (s, 1H), 6.82 (s, 1H), 6.74 (s, 1H), 6.67 (d,  $J = 8.0$  Hz, 1H), 5.69 (d,  $J = 5.6$  Hz, 1H), 3.62 (s, 3H), 3.26 (s, 3H), 2.24 (s, 3H), 1.87 (s, 3H) ppm;  $^{13}\text{C}$  NMR (100 MHz,  $\text{CDCl}_3$ ):  $\delta = 175.5$ , 171.6, 165.7, 157.2, 141.1, 137.0, 132.3, 131.0, 129.5, 127.1, 125.8, 122.4, 107.8, 89.7, 60.0, 52.3, 26.6, 21.0, 19.1 ppm; ESI-HRMS: calcd. for  $\text{C}_{19}\text{H}_{19}\text{NO}_5 + \text{Na}$  364.1161, found 364.1156.

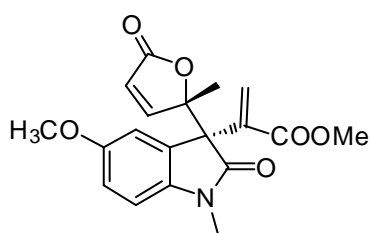

**4e**, 90% yield;  $[\alpha]_D^{20} = +26.8$  ( $c = 0.5$  in  $\text{CHCl}_3$ ); 89% ee, determined by HPLC analysis [Daicel Chiralcel OD,  $n$ -hexane/ $i$ -PrOH = 80/20, 1.0 mL/min,  $\lambda = 254$  nm,  $t$  (major) = 18.740 min,  $t$  (minor) = 11.663 min.];  $^1\text{H}$  NMR (400 MHz,  $\text{CDCl}_3$ ):  $\delta = 7.03$  (d,  $J = 5.6$  Hz, 1H), 6.81 (s, 1H), 6.77 (dd,  $J = 8.4$  Hz, 2.8 Hz, 1H), 6.74 (s, 1H), 6.72 (d,  $J = 2.8$  Hz, 1H), 6.68 (d,  $J = 8.4$  Hz, 1H), 5.70 (d,  $J = 5.6$  Hz, 1H), 3.69 (s, 3H), 3.61 (s, 3H), 3.24 (s, 3H), 1.86 (s, 3H) ppm;  $^{13}\text{C}$

NMR (100 MHz, CDCl<sub>3</sub>):  $\delta$  = 175.2, 171.7, 165.6, 157.3, 155.7, 136.9, 131.2, 128.3, 122.4, 114.7, 111.3, 108.6, 89.6, 60.2, 55.7, 52.3, 26.7, 19.1 ppm; ESI-HRMS: calcd. for C<sub>19</sub>H<sub>19</sub>NO<sub>6</sub>+Na 380.1110, found 380.1109.

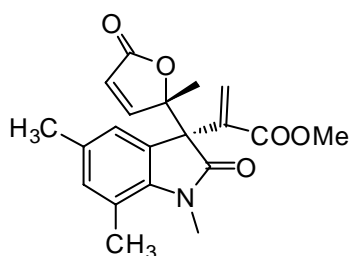

**4f**, 88% yield;  $[\alpha]_D^{20}$  = +27.2 ( $c$  = 0.5 in CHCl<sub>3</sub>); 92% ee, determined by HPLC analysis [Daicel Chiralcel OD, *n*-hexane/*i*-PrOH = 80/20, 1.0 mL/min,  $\lambda$  = 254 nm,  $t$  (major) = 12.660 min,  $t$  (minor) = 6.586 min]; <sup>1</sup>H NMR (400 MHz, CDCl<sub>3</sub>):  $\delta$  = 7.05 (d,  $J$  = 5.6 Hz, 1H), 6.80 (s, 1H), 6.76 (d,  $J$  = 2.8 Hz, 2H), 5.70 (d,  $J$  = 5.6 Hz, 1H), 3.63 (s, 3H), 3.52 (s, 3H), 2.49 (s, 3H), 2.18 (s, 3H), 1.86 (s, 3H) ppm; <sup>13</sup>C NMR (100 MHz, CDCl<sub>3</sub>):  $\delta$  = 176.2, 171.6, 165.7, 157.3, 138.8, 137.2, 133.5, 131.9, 130.8, 127.6, 123.7, 122.3, 119.1, 89.7, 59.5, 52.2, 23.0, 20.6, 19.2, 18.8 ppm; ESI-HRMS: calcd. for C<sub>20</sub>H<sub>21</sub>NO<sub>5</sub>+Na 378.1317, found 378.1316.

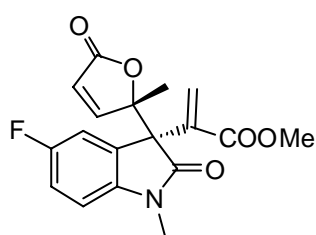

**4g**, 80% yield;  $[\alpha]_D^{20}$  = +8.0 ( $c$  = 0.2 in CHCl<sub>3</sub>); 92% ee, determined by HPLC analysis [Daicel Chiralcel OD, *n*-hexane/*i*-PrOH = 80/20, 1.0 mL/min,  $\lambda$  = 254 nm,  $t$  (major) = 13.872 min,  $t$  (minor) = 8.391 min]; <sup>1</sup>H NMR (400 MHz, CDCl<sub>3</sub>):  $\delta$  = 7.06 (d,  $J$  = 5.6 Hz, 1H), 6.96 (td,  $J$  = 8.8 Hz, 2.4 Hz, 1H), 6.89 (dd,  $J$  = 8.0 Hz, 2.4 Hz, 1H), 6.83 (s, 1H), 6.77 (s, 1H), 6.73 (dd,  $J$  = 8.4 Hz, 4.0 Hz, 1H), 5.75 (d,  $J$  = 5.6 Hz, 1H), 3.64 (s, 3H), 3.27 (s, 3H), 1.87 (s, 3H) ppm; <sup>13</sup>C NMR (100 MHz, CDCl<sub>3</sub>):  $\delta$  = 175.2, 171.2, 165.5, 158.8 (d,  $^1J_{C,F}$  = 240.8 Hz), 157.0, 139.6, 136.6, 131.6, 128.8 (d,  $^3J_{C,F}$  = 8.4 Hz), 122.5, 115.6 (d,  $^2J_{C,F}$  = 23.6 Hz), 113.2 (d,  $^2J_{C,F}$  = 25.0 Hz), 108.6 (d,  $^3J_{C,F}$  = 8.0 Hz), 89.4, 60.1, 52.4, 26.8, 19.2 ppm; ESI-HRMS: calcd. for C<sub>18</sub>H<sub>16</sub>FNO<sub>5</sub>+Na 368.0910, found 368.0903.

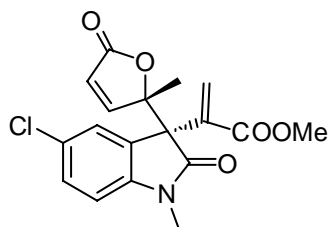

**4h**, 83% yield;  $[\alpha]_D^{20}$  = +45.2 ( $c$  = 0.4 in CHCl<sub>3</sub>); 92% ee, determined by HPLC analysis [Daicel Chiralcel OD, *n*-hexane/*i*-PrOH = 80/20, 1.0 mL/min,  $\lambda$  = 254 nm,  $t$  (major) = 28.473 min,  $t$  (minor) = 16.415 min]; <sup>1</sup>H NMR (400 MHz, CDCl<sub>3</sub>):  $\delta$  = 7.23 (dd,  $J$  = 8.0 Hz, 2.0 Hz, 1H), 7.10 (d,  $J$  = 2.0 Hz, 1H), 7.05 (d,  $J$  = 5.6 Hz, 1H), 6.84 (s, 1H), 6.78 (s, 1H), 6.72 (d,  $J$  = 8.0 Hz, 1H),

5.76 (d,  $J = 5.6$  Hz, 1H), 3.64 (s, 3H), 3.27 (s, 3H), 1.86 (s, 3H) ppm;  $^{13}\text{C}$  NMR (100 MHz,  $\text{CDCl}_3$ ):  $\delta = 175.2, 171.1, 165.5, 156.8, 142.2, 136.5, 131.7, 129.2, 128.8, 128.0, 125.4, 122.7, 109.0, 89.3, 52.4, 26.8, 25.3, 19.2$  ppm; ESI-HRMS: calcd. for  $\text{C}_{18}\text{H}_{16}\text{ClNO}_5 + \text{Na}$  384.0615, found 384.0612.

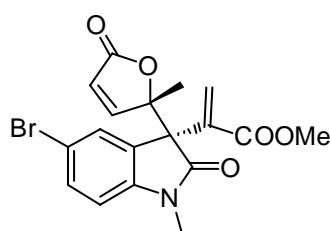

**4i**, 91% yield;  $[\alpha]_{\text{D}}^{20} = +61.0$  ( $c = 0.5$  in  $\text{CHCl}_3$ ); 90% ee, determined by HPLC analysis [Daicel Chiralcel OD,  $n$ -hexane/ $i$ -PrOH = 80/20, 1.0 mL/min,  $\lambda = 254$  nm,  $t$  (major) = 21.370 min,  $t$  (minor) = 11.016 min];  $^1\text{H}$  NMR (400 MHz,  $\text{CDCl}_3$ ):  $\delta = 7.36$  (dd,  $J = 8.4$  Hz, 1.6 Hz, 1H), 7.21 (d,  $J = 1.6$  Hz, 1H), 7.03 (d,  $J = 5.6$  Hz, 1H), 6.81 (s, 1H), 6.75 (s, 1H), 6.66 (d,  $J = 8.4$  Hz, 1H), 5.74 (d,  $J = 5.6$  Hz, 1H), 3.62 (s, 3H), 3.24 (s, 3H), 1.84 (s, 3H) ppm;  $^{13}\text{C}$  NMR (100 MHz,  $\text{CDCl}_3$ ):  $\delta = 175.1, 171.1, 165.5, 156.7, 142.7, 136.5, 132.1, 131.7, 129.1, 128.1, 122.7, 115.2, 109.5, 89.2, 60.0, 52.4, 26.7, 19.1$  ppm; ESI-HRMS: calcd. for  $\text{C}_{18}\text{H}_{16}\text{BrNO}_5 + \text{Na}$  428.0110, found 428.0112.

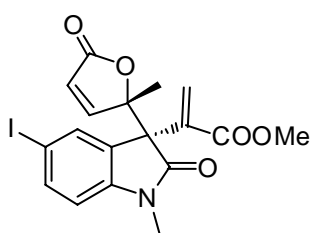

**4j**, 90% yield;  $[\alpha]_{\text{D}}^{20} = +60.6$  ( $c = 0.5$  in  $\text{CHCl}_3$ ); 90% ee, determined by HPLC analysis [Daicel Chiralpak OD,  $n$ -hexane/ $i$ -PrOH = 80/20, 1.0 mL/min,  $\lambda = 254$  nm,  $t$  (major) = 20.384 min,  $t$  (minor) = 10.854 min];  $^1\text{H}$  NMR (400 MHz,  $\text{CDCl}_3$ ):  $\delta = 7.58$  (dd,  $J = 8.4$  Hz, 1.6 Hz, 1H), 7.39 (d,  $J = 1.6$  Hz, 1H), 7.04 (d,  $J = 5.6$  Hz, 1H), 6.83 (s, 1H), 6.77 (s, 1H), 6.58 (d,  $J = 8.4$  Hz, 1H), 5.76 (d,  $J = 5.6$  Hz, 1H), 3.64 (s, 3H), 3.26 (s, 3H), 1.86 (s, 3H) ppm;  $^{13}\text{C}$  NMR (100 MHz,  $\text{CDCl}_3$ ):  $\delta = 175.0, 171.1, 165.5, 156.6, 143.4, 138.1, 136.5, 133.6, 131.7, 129.3, 122.8, 110.1, 89.2, 85.0, 52.4, 26.7, 19.1$  ppm; ESI-HRMS: calcd. for  $\text{C}_{18}\text{H}_{16}\text{INO}_5 + \text{Na}$  475.9971, found 475.9981.

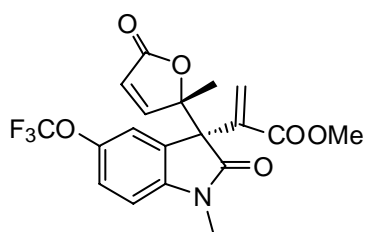

**4k**, 83% yield;  $[\alpha]_{\text{D}}^{20} = +12.0$  ( $c = 0.2$  in  $\text{CHCl}_3$ ); 86% ee, determined by HPLC analysis [Daicel Chiralcel OD,  $n$ -hexane/ $i$ -PrOH = 80/20, 1.0 mL/min,  $\lambda = 254$  nm,  $t$  (major) = 15.291 min,  $t$  (minor) = 8.201 min];  $^1\text{H}$  NMR (400 MHz,  $\text{CDCl}_3$ ):  $\delta = 7.13$  (d,  $J = 8.4$  Hz, 1H), 7.03 (d,  $J = 5.6$  Hz, 1H), 7.01 (s, 1H), 6.84 (s, 1H), 6.78 (d,  $J = 7.2$  Hz, 1H), 6.77 (s, 1H), 5.74 (d,  $J = 5.6$  Hz, 1H), 3.63 (s, 3H), 3.28 (s, 3H), 1.85 (s, 3H) ppm;  $^{13}\text{C}$  NMR (100 MHz,  $\text{CDCl}_3$ ):  $\delta = 175.3, 170.9, 165.6, 156.7, 144.4, 142.3, 136.4, 131.8, 128.7, 122.6, 122.5, 119.0, 108.5, 89.2, 60.0, 52.4, 26.8, 19.2$  ppm; ESI-HRMS: calcd. for  $\text{C}_{19}\text{H}_{16}\text{F}_3\text{NO}_6 + \text{Na}$  434.0827, found 434.0828.

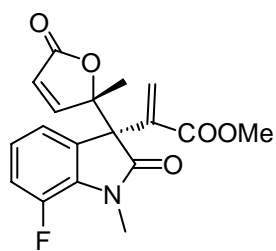

**4l**, 75% yield;  $[\alpha]_D^{20} = +27.0$  ( $c = 0.2$  in  $\text{CHCl}_3$ ); 90% ee, determined by HPLC analysis [Daicel Chiralcel OD,  $n$ -hexane/ $i$ -PrOH = 80/20, 1.0 mL/min,  $\lambda = 254$  nm,  $t$  (major) = 9.237 min,  $t$  (minor) = 7.006 min];  $^1\text{H}$  NMR (400 MHz,  $\text{CDCl}_3$ ):  $\delta = 7.09$  (d,  $J = 5.6$  Hz, 1H), 6.99-6.88 (m, 3H), 6.83 (s, 1H), 6.76 (s, 1H), 5.75 (d,  $J = 5.6$  Hz, 1H), 3.65 (s, 3H), 3.49 (d,  $J_{\text{H,F}} = 2.4$  Hz, 3H), 1.87 (s, 3H) ppm;  $^{13}\text{C}$  NMR (100 MHz,  $\text{CDCl}_3$ ):  $\delta = 175.2, 171.4, 165.6, 156.9, 147.4$  (d,  $^1J_{\text{C,F}} = 242.3$  Hz), 136.7, 131.5, 130.2, 129.9, 123.1 (d,  $^3J_{\text{C,F}} = 6.4$  Hz), 122.6, 120.8 (d,  $^4J_{\text{C,F}} = 3.1$  Hz), 117.2 (d,  $^2J_{\text{C,F}} = 19.6$  Hz), 89.4, 60.1, 52.4, 29.1 (d,  $^4J_{\text{C,F}} = 6.1$  Hz), 19.0 ppm; ESI-HRMS: calcd. for  $\text{C}_{18}\text{H}_{16}\text{FNO}_5 + \text{H}$  346.1091, found 346.1084.

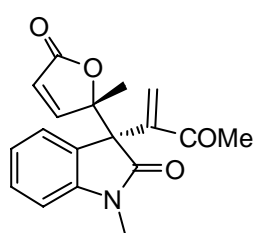

**4m**, 80% yield;  $[\alpha]_D^{20} = +29.2$  ( $c = 0.5$  in  $\text{CHCl}_3$ ); 92% ee, determined by HPLC analysis [Daicel Chiralcel AS,  $n$ -hexane/ $i$ -PrOH = 80/20, 1.0 mL/min,  $\lambda = 254$  nm,  $t$  (major) = 31.230 min,  $t$  (minor) = 21.196 min];  $^1\text{H}$  NMR (400 MHz,  $\text{CDCl}_3$ ):  $\delta = 7.22$  (td,  $J = 7.6$  Hz, 1.2 Hz, 1H), 7.09 (s, 1H), 7.05 (d,  $J = 5.6$  Hz, 1H), 7.04 (d,  $J = 1.2$  Hz, 1H), 6.91 (td,  $J = 7.6$  Hz, 1.2 Hz, 1H), 6.77 (d,  $J = 7.6$  Hz, 1H), 6.61 (s, 1H), 5.68 (d,  $J = 5.6$  Hz, 1H), 3.28 (s, 3H), 2.30 (s, 3H), 1.86 (s, 3H) ppm;  $^{13}\text{C}$  NMR (100 MHz,  $\text{CDCl}_3$ ):  $\delta = 198.0, 176.0, 171.6, 157.2, 146.2, 143.6, 131.3, 129.1, 127.2, 124.6, 122.5, 122.3, 108.1, 89.6, 77.2, 26.6, 25.9, 19.0$  ppm; ESI-HRMS: calcd. for  $\text{C}_{18}\text{H}_{17}\text{NO}_4 + \text{Na}$  334.1055, found 334.1054.

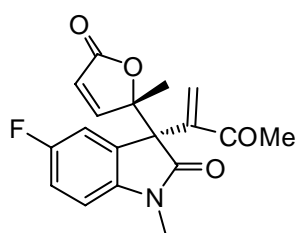

**4n**, 73% yield;  $[\alpha]_D^{20} = +6.5$  ( $c = 0.4$  in  $\text{CHCl}_3$ ); 91% ee, determined by HPLC analysis [Daicel Chiralcel AD,  $n$ -hexane/ $i$ -PrOH = 80/20, 1.0 mL/min,  $\lambda = 254$  nm,  $t$  (major) = 14.320 min,  $t$  (minor) = 10.904 min];  $^1\text{H}$  NMR (400 MHz,  $\text{CDCl}_3$ ):  $\delta = 7.06$  (d,  $J = 5.6$  Hz, 1H), 6.94 (td,  $J = 8.4$  Hz, 2.4 Hz, 1H), 6.81 (dd,  $J = 12.0$  Hz, 2.4 Hz, 1H), 6.71 (dd,  $J = 8.4$  Hz, 4.0 Hz, 1H), 6.64 (s, 1H), 5.74 (d,  $J = 5.6$  Hz, 1H), 3.28 (s, 3H), 2.32 (s, 3H), 1.86 (s, 3H) ppm;  $^{13}\text{C}$  NMR (100 MHz,  $\text{CDCl}_3$ ):  $\delta = 198.0, 175.7, 171.3, 158.7$  (d,  $^1J_{\text{C,F}} = 240.5$  Hz), 157.0, 145.9, 139.6, 131.8, 128.9, 122.5, 115.4 (d,  $^2J_{\text{C,F}} = 23.1$  Hz), 112.8 (d,  $^2J_{\text{C,F}} = 25.4$  Hz), 108.6 (d,  $^3J_{\text{C,F}} = 7.9$  Hz), 89.3, 26.8, 25.9, 24.4, 19.1 ppm; ESI-HRMS: calcd. for  $\text{C}_{18}\text{H}_{16}\text{FNO}_4 + \text{Na}$  352.0961, found 352.0960.

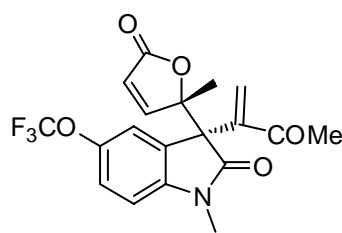

**4o**, 80% yield;  $[\alpha]_D^{20} = +2.2$  ( $c = 0.4$  in  $\text{CHCl}_3$ ); 91% ee, determined by HPLC analysis [Daicel Chiralcel AD,  $n$ -hexane/ $i$ -PrOH = 60/40, 1.0 mL/min,  $\lambda = 254$  nm,  $t$  (major) = 11.253 min,  $t$  (minor) = 8.685 min];  $^1\text{H}$  NMR (400 MHz,  $\text{CDCl}_3$ ):  $\delta = 7.12$  (d,  $J = 5.2$  Hz, 1H), 7.11 (s, 1H), 7.04 (d,  $J = 5.6$  Hz, 1H), 6.95 (s, 1H), 6.77 (d,  $J = 8.4$  Hz, 1H), 6.66 (s, 1H), 5.74 (d,  $J = 5.6$  Hz, 1H), 3.30 (s, 3H), 2.32 (s, 3H), 1.86 (s, 3H) ppm;  $^{13}\text{C}$  NMR (100 MHz,  $\text{CDCl}_3$ ):  $\delta = 198.0, 175.8, 170.9, 156.8, 145.8, 142.3, 132.0, 128.8, 122.6, 122.3, 118.7, 108.5, 89.2, 77.2, 59.7, 26.9, 25.9, 19.1$  ppm; ESI-HRMS: calcd. for  $\text{C}_{19}\text{H}_{16}\text{F}_3\text{NO}_5 + \text{Na}$  418.0878, found 418.0878.

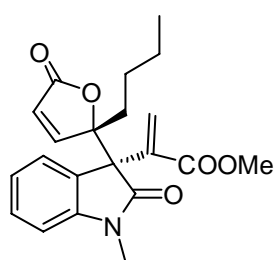

**4p**, 70% yield;  $[\alpha]_D^{20} = +30.4$  ( $c = 0.5$  in  $\text{CHCl}_3$ ); dr = 83:17 (by  $^1\text{H}$  NMR analysis); for major isomer: 80% ee, determined by HPLC analysis [Daicel Chiralcel AD,  $n$ -hexane/ $i$ -PrOH = 80/20, 1.0 mL/min,  $\lambda = 254$  nm,  $t$  (major) = 5.937 min,  $t$  (minor) = 5.417 min];  $^1\text{H}$  NMR (400 MHz,  $\text{CDCl}_3$ ):  $\delta = 7.25$  (t,  $J = 8.0$  Hz, 1H), 7.11 (d,  $J = 8.0$  Hz, 1H), 6.96 (t,  $J = 8.0$  Hz, 1H), 6.94 (d,  $J = 5.6$  Hz, 1H), 6.78 (d,  $J = 8.0$  Hz, 1H), 6.78 (s, 1H), 6.72 (s, 1H), 5.73 (d,  $J = 5.6$  Hz, 1H), 3.62 (s, 3H), 3.28 (s, 3H), 2.58-2.42 (m, 2H), 1.34-1.24 (m, 2H), 0.94-0.89 (m, 2H), 0.86 (t,  $J = 7.2$  Hz, 3H) ppm;  $^{13}\text{C}$  NMR (100 MHz,  $\text{CDCl}_3$ ):  $\delta = 175.7, 172.1, 165.8, 155.6, 143.5, 137.0, 131.1, 129.2, 127.3, 125.0, 123.6, 122.7, 108.0, 92.4, 60.5, 52.3, 29.4, 26.6, 25.2, 22.6, 13.9$  ppm; ESI-HRMS: calcd. for  $\text{C}_{21}\text{H}_{23}\text{NO}_5 + \text{Na}$  392.1474, found 392.1475.

### Synthetic transformations of allylic product **4a**

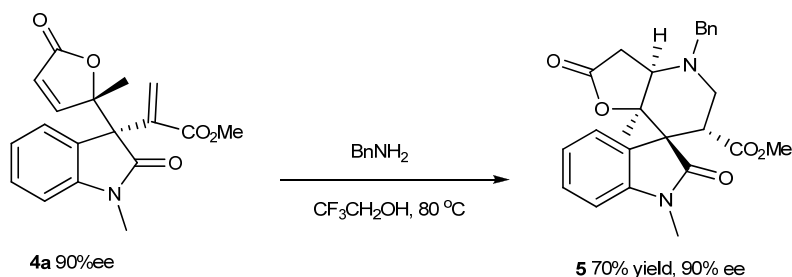

A solution of **4a** (65.4 mg, 0.20 mmol, 90% ee) and  $\text{BnNH}_2$  (110  $\mu\text{L}$ , 1.00 mmol) in  $\text{CF}_3\text{CH}_2\text{OH}$  (0.5 mL) was stirred at 80  $^\circ\text{C}$  for 5 hours. Then  $\text{Boc}_2\text{O}$  (436 mg, 2.00 mmol) was added and the solution was stirred at rt until the consumption of excess  $\text{BnNH}_2$ . After removing the solvent, the residue was purified by flash chromatography on silica gel (PE/AcOEt = 2:1) to afford the product **5** as a colorless oil

(61.0 mg, 70% yield).  $[\alpha]_D^{20} = -9.2$  ( $c = 0.9$  in  $\text{CHCl}_3$ ); 90% ee, determined by HPLC analysis [Daicel Chiralcel AD,  $n$ -hexane/ $i$ -PrOH = 70/30, 1.0 mL/min,  $\lambda = 254$  nm,  $t$  (major) = 15.195 min,  $t$  (minor) = 14.046 min];  $^1\text{H}$  NMR (400 MHz,  $\text{CDCl}_3$ ):  $\delta = 7.54$  (d,  $J = 7.2$  Hz, 1H), 7.41-7.30 (m, 6H), 6.97 (td,  $J = 7.6$  Hz, 0.8 Hz, 1H), 6.86 (d,  $J = 8.0$  Hz, 1H), 3.97 (d,  $J = 13.6$  Hz, 1H), 3.71 (dd,  $J = 7.2$  Hz, 6.0 Hz, 1H), 3.66 (d,  $J = 13.6$  Hz, 1H), 3.35 (d,  $J = 5.6$  Hz, 1H), 3.29 (dd,  $J = 12.4$  Hz, 7.2 Hz, 1H), 3.28 (s, 3H), 3.23 (s, 3H), 3.05 (dd,  $J = 12.4$  Hz, 6.0 Hz, 1H), 2.83 (d,  $J = 18.0$  Hz, 1H), 2.66 (dd,  $J = 18.0$  Hz, 5.6 Hz, 1H), 0.94 (s, 3H) ppm;  $^{13}\text{C}$  NMR (100 MHz,  $\text{CDCl}_3$ ):  $\delta = 198.0, 175.8, 170.9, 156.8, 145.8, 142.3, 132.0, 128.8, 122.6, 122.3, 118.7, 108.5, 89.2, 77.2, 59.7, 26.9, 25.9, 19.1$  ppm; ESI-HRMS: calcd. for  $\text{C}_{25}\text{H}_{26}\text{N}_2\text{O}_5 + \text{H}$  435.1920, found 435.1920. The relative configuration has been established by 2D NMR and NOE analysis.

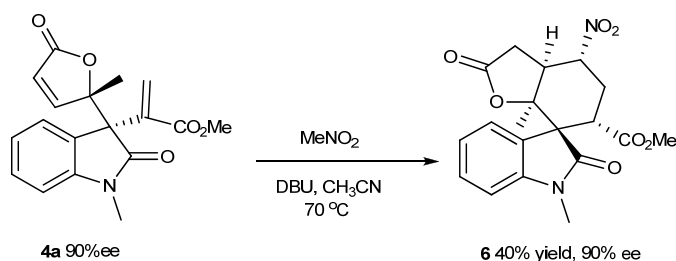

A solution of **4a** (50.0 mg, 0.15 mmol, 90% ee),  $\text{MeNO}_2$  (1.50 mmol, 80  $\mu\text{L}$ ) and DBU (0.07 mmol, 11.4 mg) in  $\text{CH}_3\text{CN}$  (0.5 mL) was refluxed until the consumption of **4a** (5 h). Then the solvent was removed in vacuum and the residue was purified by flash chromatography on silica gel (PE/AcOEt = 2:1) to give **6** as a white solid (23.0 mg, 40% yield).  $[\alpha]_D^{20} = +5.5$  ( $c = 0.9$  in  $\text{CHCl}_3$ ); 90% ee, determined by HPLC analysis [Daicel Chiralcel OD,  $n$ -hexane/ $i$ -PrOH = 60/40, 1.0 mL/min,  $\lambda = 254$  nm,  $t$  (major) = 26.963 min,  $t$  (minor) = 19.554 min];  $^1\text{H}$  NMR (400 MHz,  $\text{CDCl}_3$ ):  $\delta = 7.42$  (t,  $J = 7.6$  Hz, 1H), 7.41 (d,  $J = 7.6$  Hz, 1H), 7.12 (t,  $J = 7.6$  Hz, 1H), 6.94 (d,  $J = 7.6$  Hz, 1H), 4.76 (m, 1H), 3.56 (dd,  $J = 12.8$  Hz, 5.6 Hz, 1H), 3.46 (s, 3H), 3.29 (s, 3H), 3.11 (dd,  $J = 10.8$  Hz, 6.8 Hz, 1H), 2.86-2.80 (m, 2H), 2.97 (dd,  $J = 18.0$  Hz, 6.8 Hz, 1H), 2.70 (d,  $J = 18.0$  Hz, 1H), 1.10 (s, 3H) ppm;  $^{13}\text{C}$  NMR (100 MHz,  $\text{CDCl}_3$ ):  $\delta = 174.2, 172.7, 169.8, 145.0, 129.8, 126.5, 124.5, 122.7, 109.0, 86.0, 85.8, 53.3, 52.4, 42.9, 42.2, 35.4, 27.1, 26.7, 22.7$  ppm; ESI-HRMS: calcd. for  $\text{C}_{19}\text{H}_{20}\text{N}_2\text{O}_7 + \text{Na}$  411.1168, found 411.1167. The relative configuration has been established by 2D NMR and NOE analysis.



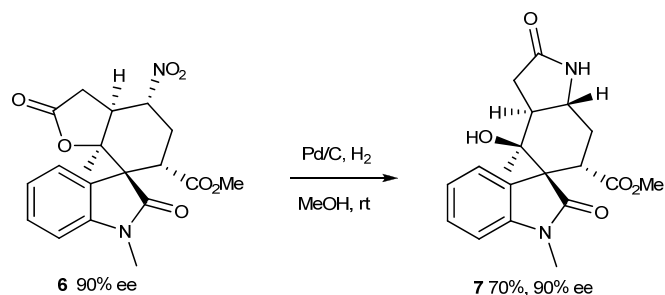

A solution of compound **6** (44.0 mg, 0.11 mmol, 90% ee) and Pd/C (10%, 5.0 mg) in MeOH was stirred at room temperature under H<sub>2</sub> atmosphere until the consumption of **6** (7 h). Then the reaction mixture was filtered and washed with methanol. The combined filtrates were evaporated in vacuum and the residue was purified by flash chromatography on silica gel (DCM/MeOH = 50:1) to give **7** as a white solid (27.5 mg, 70% yield).  $[\alpha]_D^{20} = +16.0$  ( $c = 0.1$  in CHCl<sub>3</sub>); 90% ee, determined by HPLC analysis [Daicel Chiralcel AD, *n*-hexane/*i*-PrOH = 60/40, 1.0 mL/min,  $\lambda = 254$  nm,  $t$  (major) = 14.526 min,  $t$  (minor) = 8.835 min]; <sup>1</sup>H NMR (400 MHz, CDCl<sub>3</sub>):  $\delta$  = 7.51 (d,  $J = 7.6$  Hz, 1H), 7.35 (t,  $J = 7.6$  Hz, 1H), 7.04 (t,  $J = 7.6$  Hz, 1H), 6.89 (d,  $J = 7.6$  Hz, 1H), 5.88 (bs, 1H), 3.57 (dd,  $J = 14.0$  Hz, 4.0 Hz, 1H), 3.41 (s, 3H), 3.27 (s, 3H), 2.92-2.84 (m, 2H), 2.71-2.58 (m, 3H), 2.35 (dt,  $J = 8.8$  Hz, 4.4 Hz, 1H) ppm; <sup>13</sup>C NMR (100 MHz, CDCl<sub>3</sub>):  $\delta$  = 175.3, 175.0, 171.4, 145.0, 129.2, 127.8, 124.9, 122.5, 108.5, 86.8, 60.8, 53.9, 52.0, 43.1, 40.2, 36.2, 26.6, 26.3, 21.8 ppm; ESI-HRMS: calcd. for C<sub>19</sub>H<sub>22</sub>N<sub>2</sub>O<sub>5</sub>+K 397.1166, found 397.1164.

#### 4. Crystal data and structure refinement for enantiopure 4a

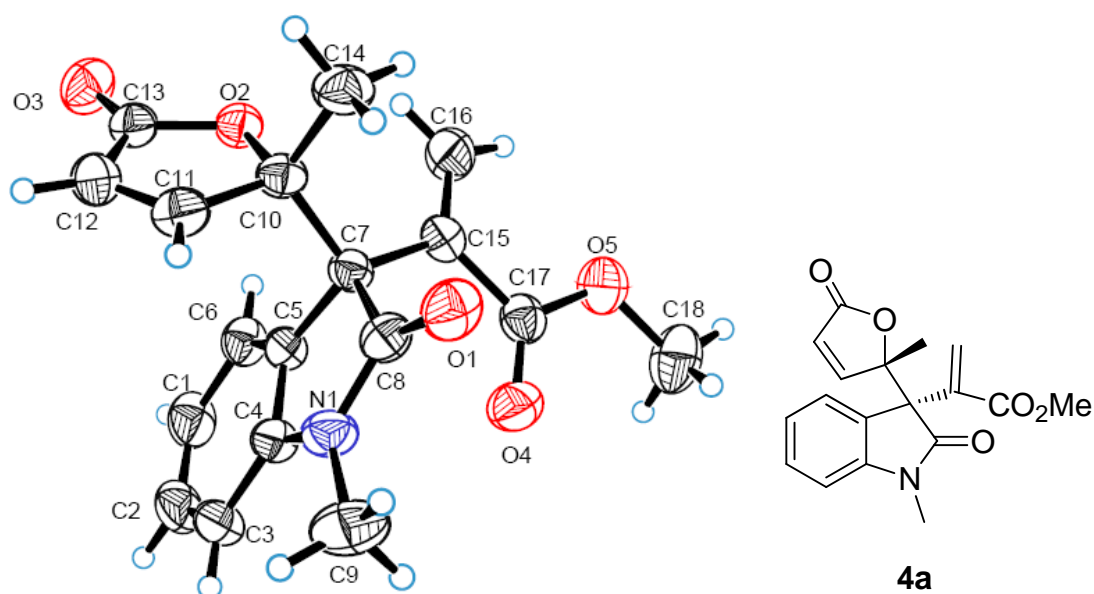

|                                       |                                                  |
|---------------------------------------|--------------------------------------------------|
| Identification code                   | <b>4a</b>                                        |
| Empirical formula                     | C <sub>18</sub> H <sub>17</sub> O <sub>5</sub> N |
| Formula weight                        | 327.33                                           |
| Temperature                           | 291(2)                                           |
| Crystal system                        | Orthorhombic                                     |
| Space group                           | P2 <sub>1</sub> 2 <sub>1</sub> 2 <sub>1</sub>    |
| a/Å, b/Å, c/Å                         | 8.923(5), 12.210(5), 15.345(5)                   |
| α/°, β/°, γ/°                         | 90.000(5), 90.000(5), 90.000(5)                  |
| Volume/Å <sup>3</sup>                 | 1671.8(13)                                       |
| Z                                     | 4                                                |
| ρ <sub>calc</sub> /mg/mm <sup>3</sup> | 1.300                                            |
| m/mm <sup>-1</sup>                    | 0.795                                            |
| F(000)                                | 688                                              |
| Crystal size                          | 0.40 × 0.40 × 0.32                               |
| Theta range for data collection       | 4.63 to 69.70°                                   |
| Index ranges                          | -10 ≤ h ≤ 10, -14 ≤ k ≤ 14, -18 ≤ l ≤ 17         |
| Reflections collected                 | 14220                                            |
| Independent reflections               | 3123[R(int) = 0.0206]                            |

|                                      |                                  |
|--------------------------------------|----------------------------------|
| Data/restraints/parameters           | 3123/0/221                       |
| Goodness-of-fit on $F^2$             | 1.051                            |
| Final R indexes [ $I > 2\sigma(I)$ ] | $R_1 = 0.0283$ , $wR_2 = 0.0737$ |
| Final R indexes [all data]           | $R_1 = 0.0285$ , $wR_2 = 0.0740$ |
| Largest diff. peak/hole              | 0.133/-0.132                     |

## 5. NMR spectra and HPLC chromatograms

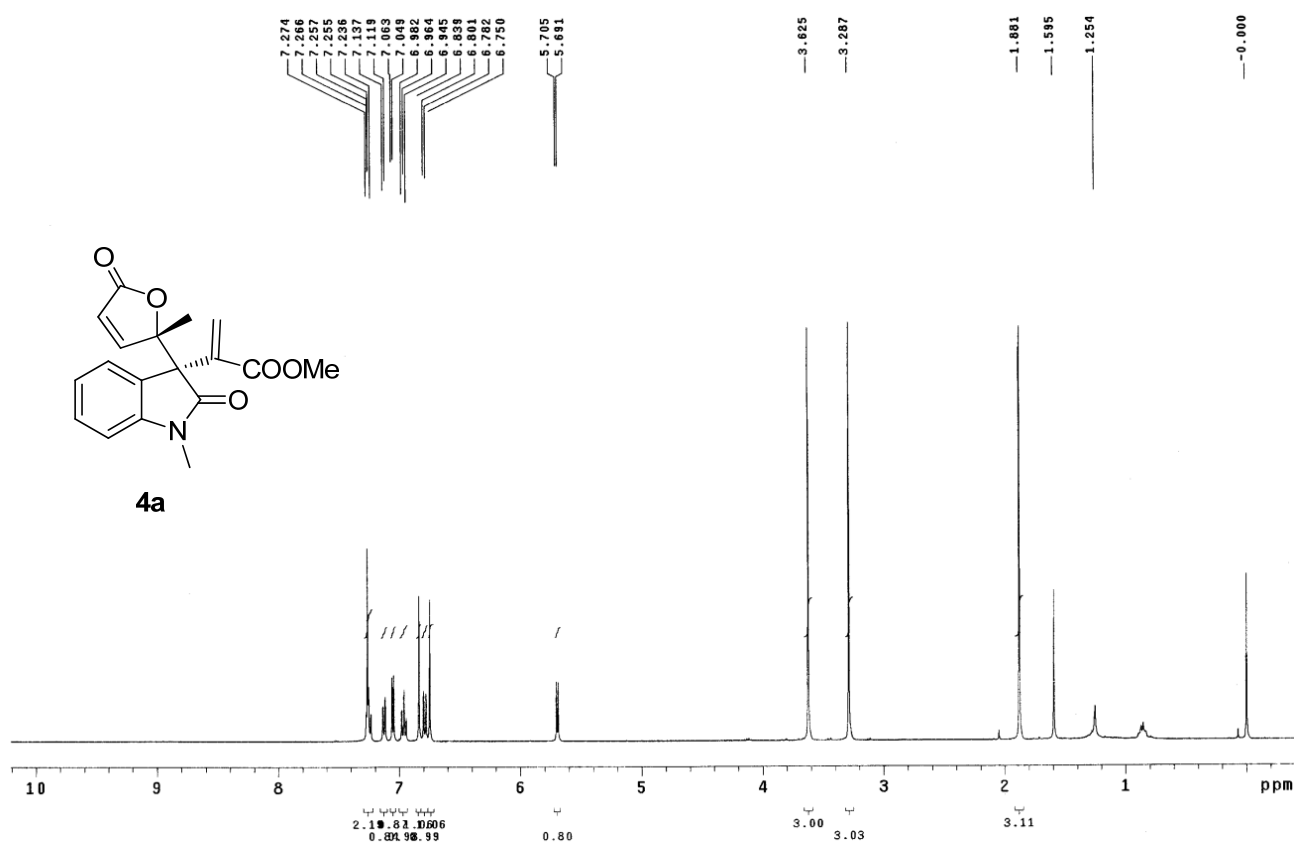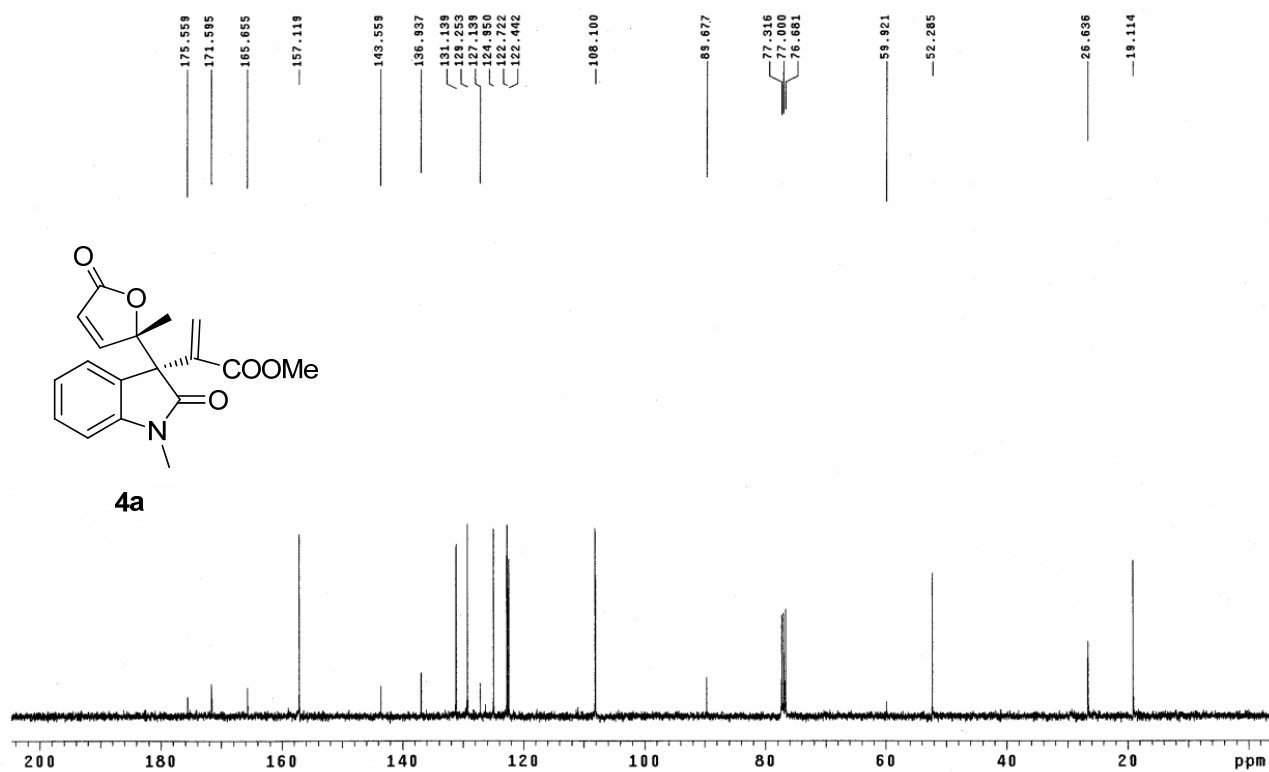

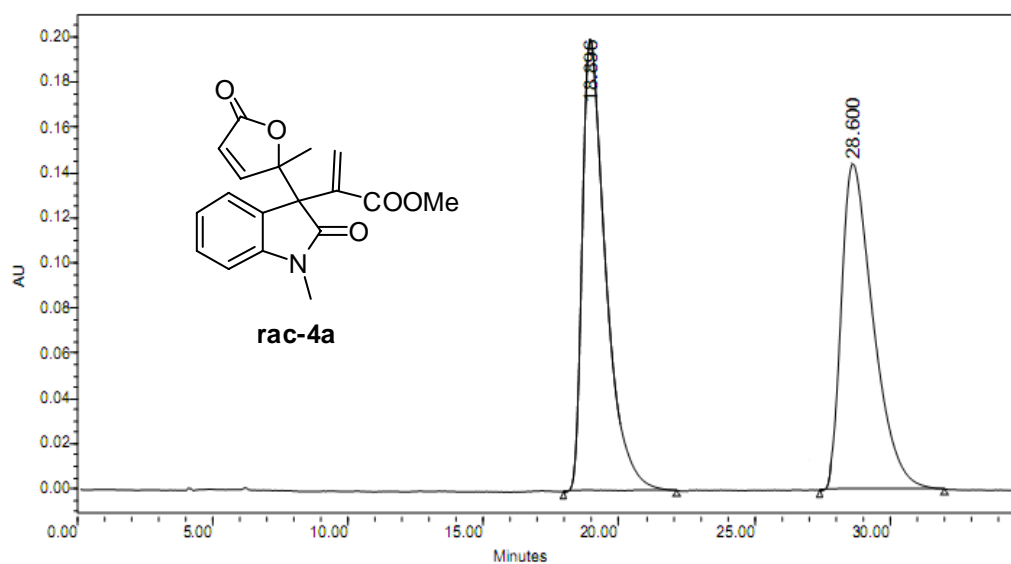

|   | RT<br>(min) | Area<br>(V *sec) | % Area | Height<br>(V) | %<br>Height |
|---|-------------|------------------|--------|---------------|-------------|
| 1 | 18.896      | 11673635         | 49.51  | 200015        | 58.08       |
| 2 | 28.600      | 11905673         | 50.49  | 144377        | 41.92       |

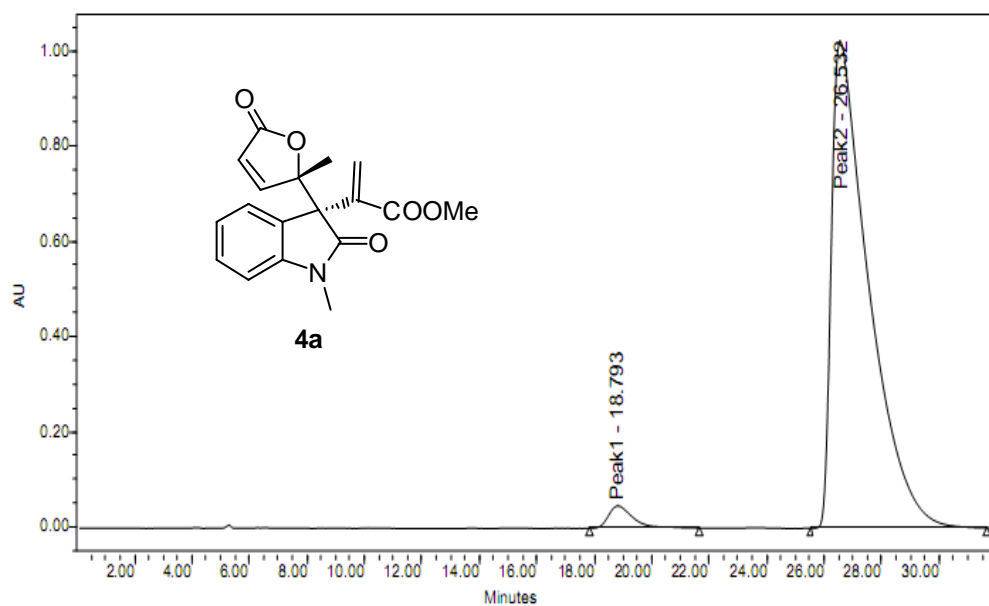

|   | RT<br>(min) | Area<br>(V *sec) | % Area | Height<br>(V) | %<br>Height |
|---|-------------|------------------|--------|---------------|-------------|
| 1 | 18.793      | 2832175          | 4.95   | 46418         | 5.07        |
| 2 | 26.532      | 54434236         | 95.05  | 868762        | 94.93       |

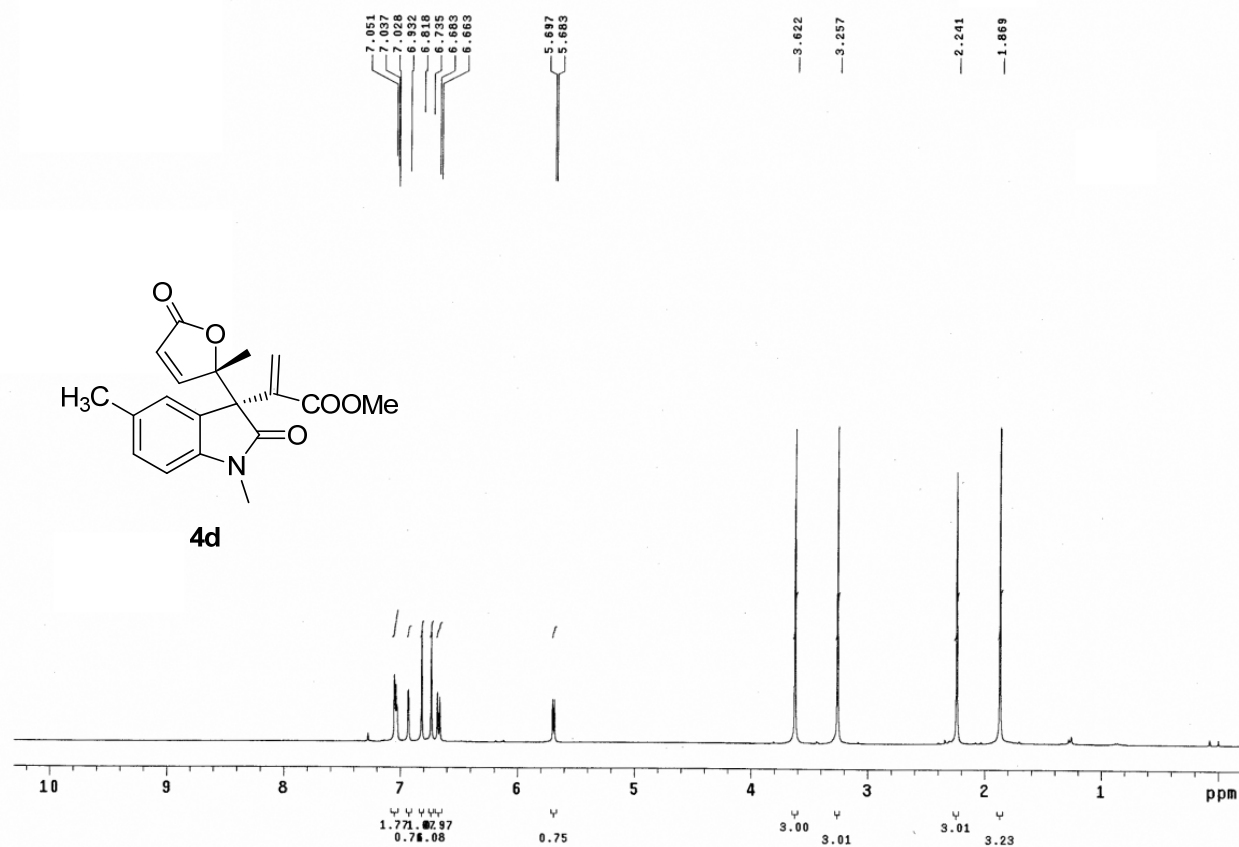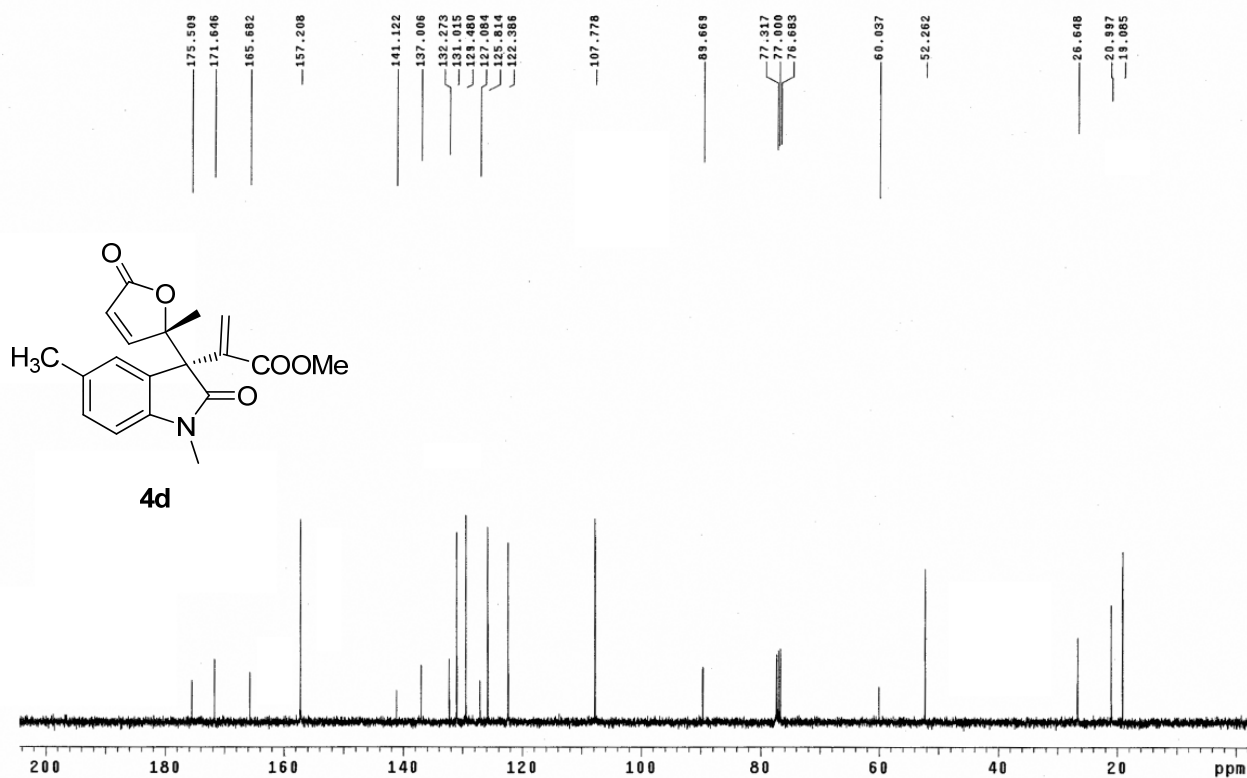

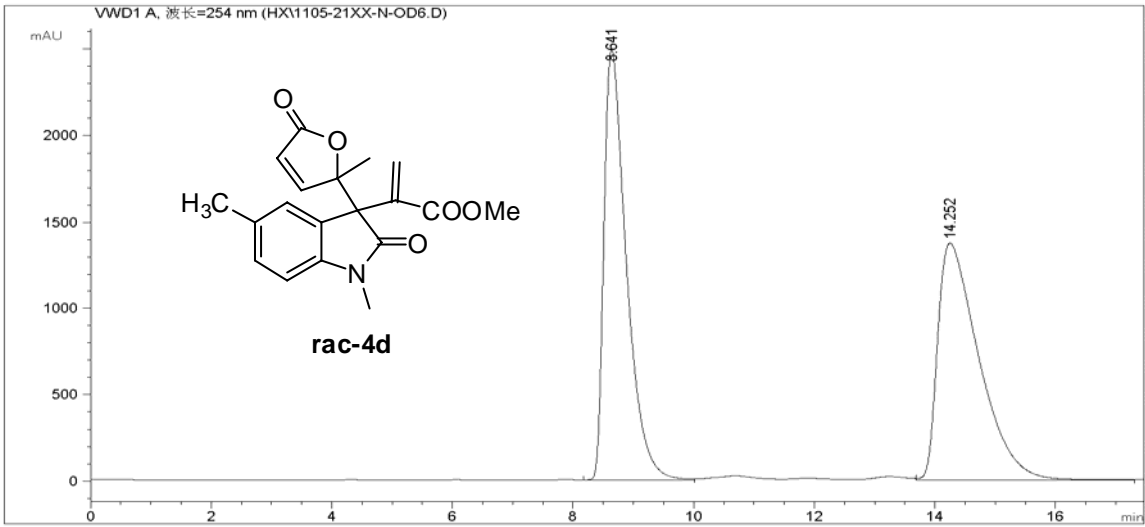

| 峰 # | 保留时间 [min] | 类型 | 峰宽 [min] | 峰面积 mAU *s | 峰高 [mAU]   | 峰面积 %   |
|-----|------------|----|----------|------------|------------|---------|
| 1   | 8.641      | VV | 0.3893   | 6.43025e4  | 2484.79736 | 49.7821 |
| 2   | 14.252     | VV | 0.7141   | 6.48655e4  | 1373.38098 | 50.2179 |

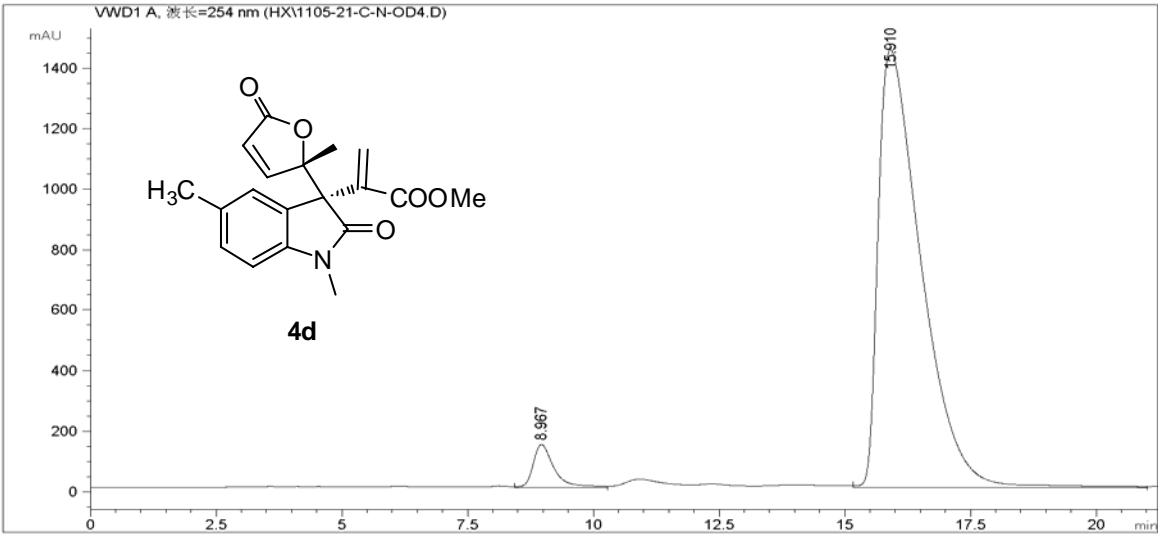

| 峰 # | 保留时间 [min] | 类型 | 峰宽 [min] | 峰面积 mAU *s | 峰高 [mAU]   | 峰面积 %   |
|-----|------------|----|----------|------------|------------|---------|
| 1   | 8.967      | VV | 0.4290   | 4052.00586 | 140.78642  | 4.5299  |
| 2   | 15.910     | VB | 0.8874   | 8.53974e4  | 1445.16736 | 95.4701 |

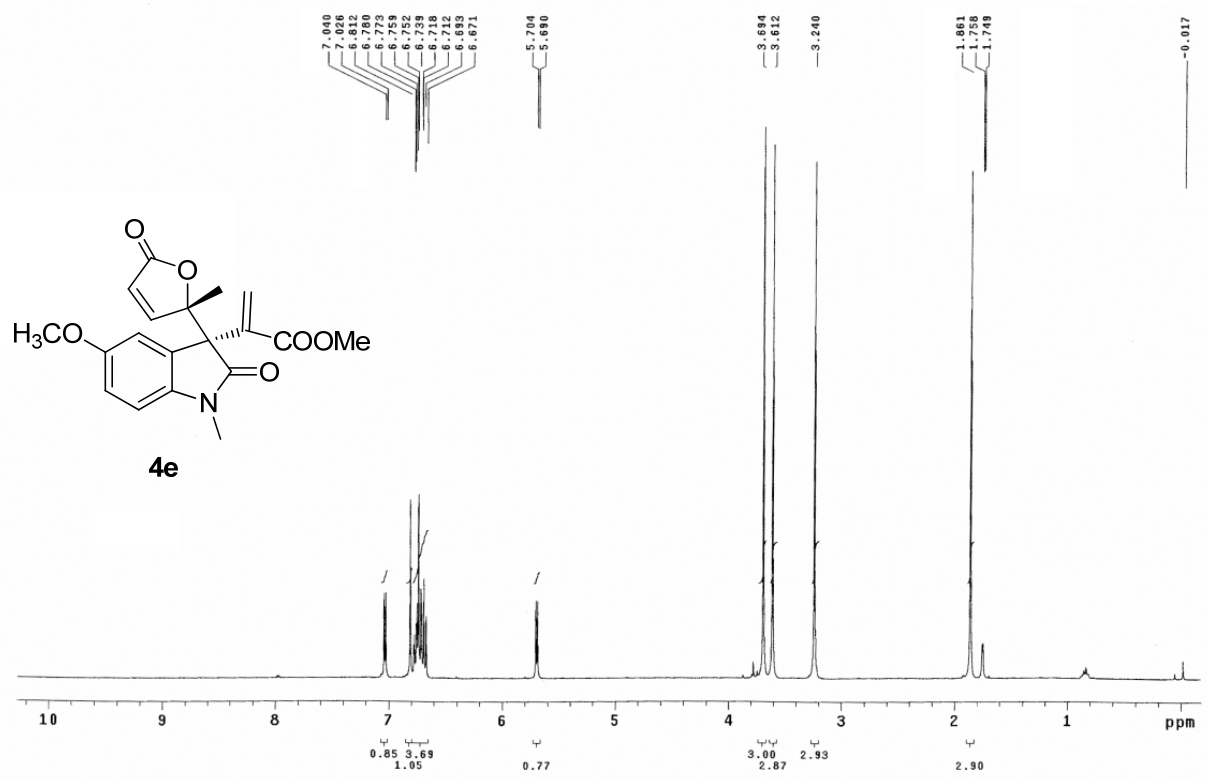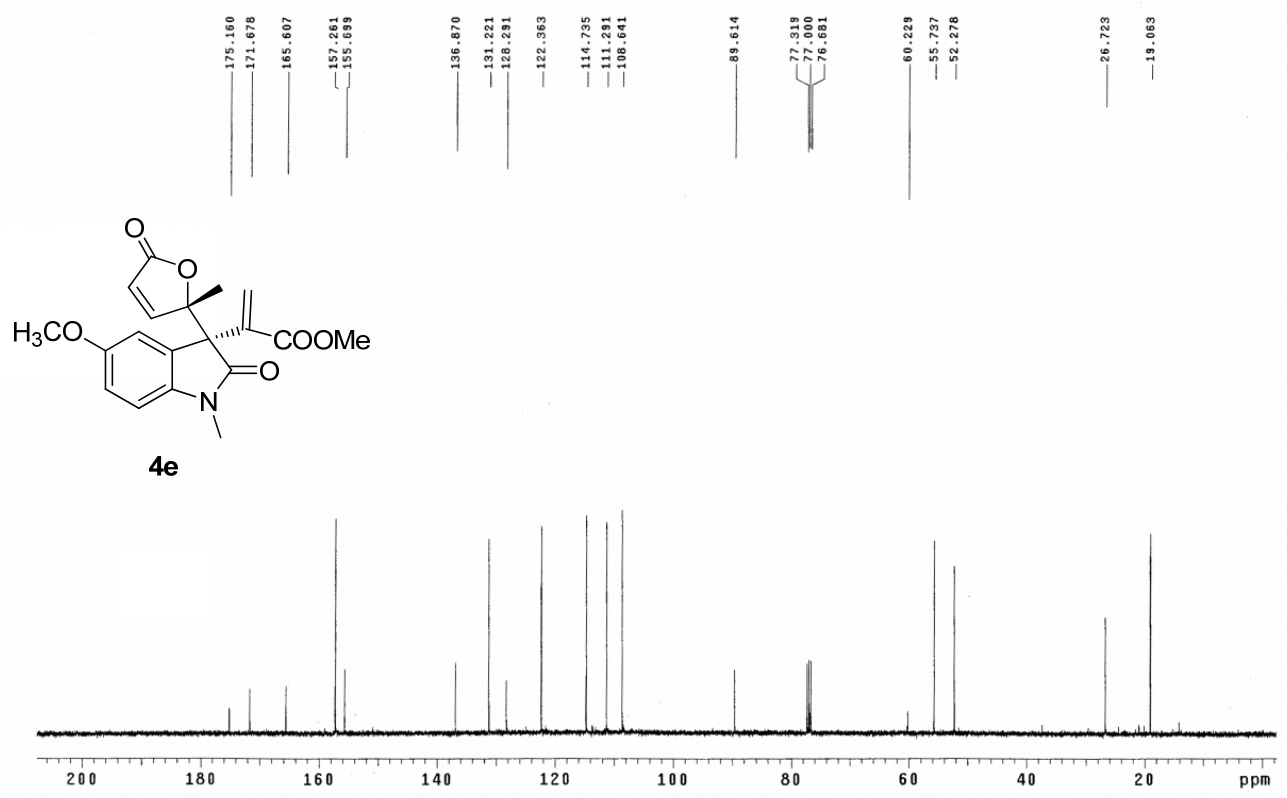



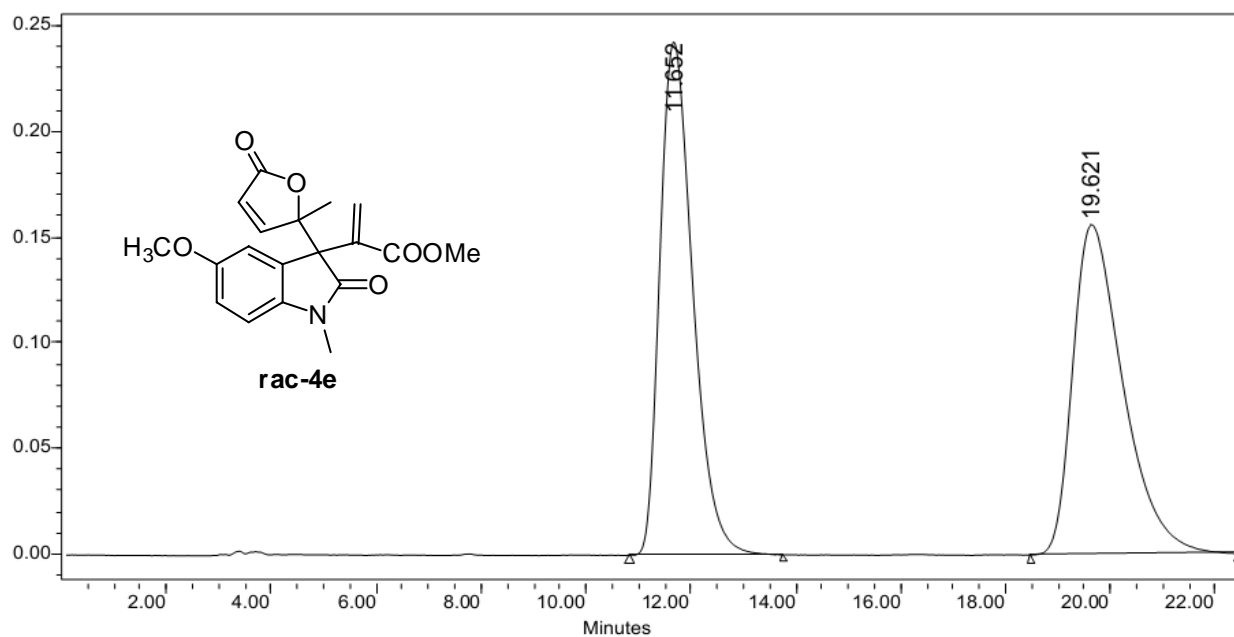

|   | RT<br>(min) | Area<br>( V *sec) | % Area | Height<br>( V ) | %<br>Height |
|---|-------------|-------------------|--------|-----------------|-------------|
| 1 | 11.652      | 10586116          | 50.34  | 242936          | 60.86       |
| 2 | 19.621      | 10443486          | 49.66  | 156225          | 39.14       |

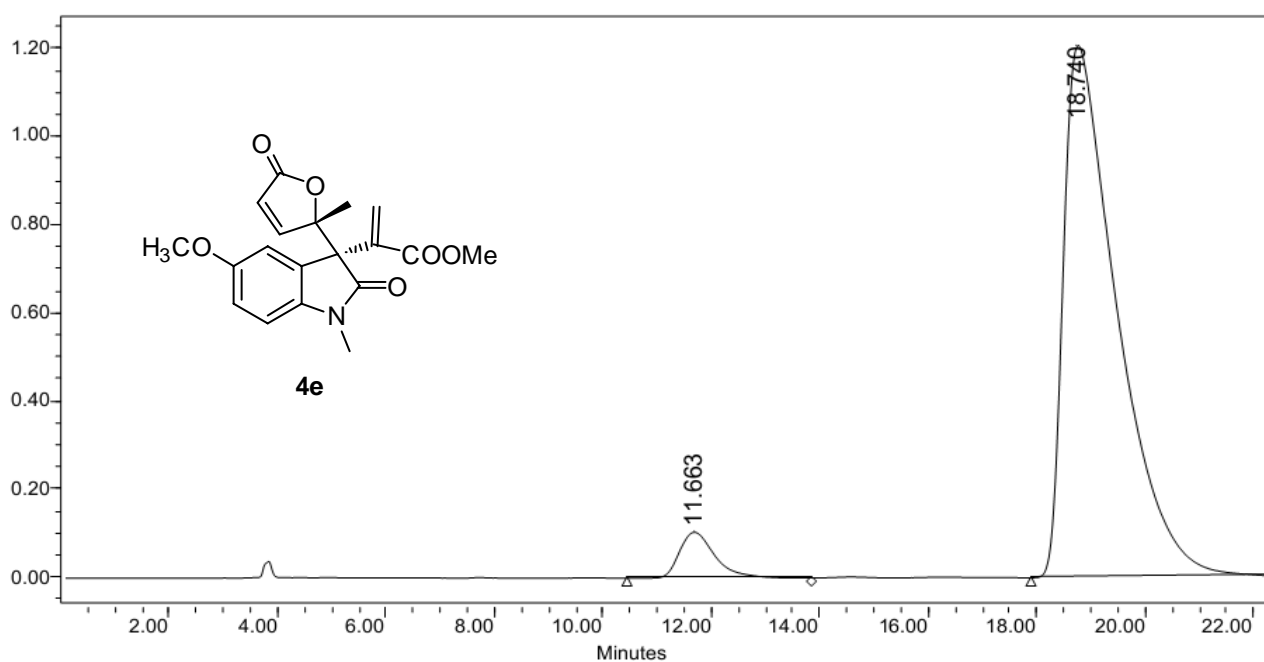

|   | RT<br>(min) | Area<br>( V *sec) | % Area | Height<br>( V ) | %<br>Height |
|---|-------------|-------------------|--------|-----------------|-------------|
| 1 | 11.663      | 4726172           | 5.39   | 104075          | 7.93        |
| 2 | 18.740      | 82877032          | 94.61  | 1208366         | 92.07       |

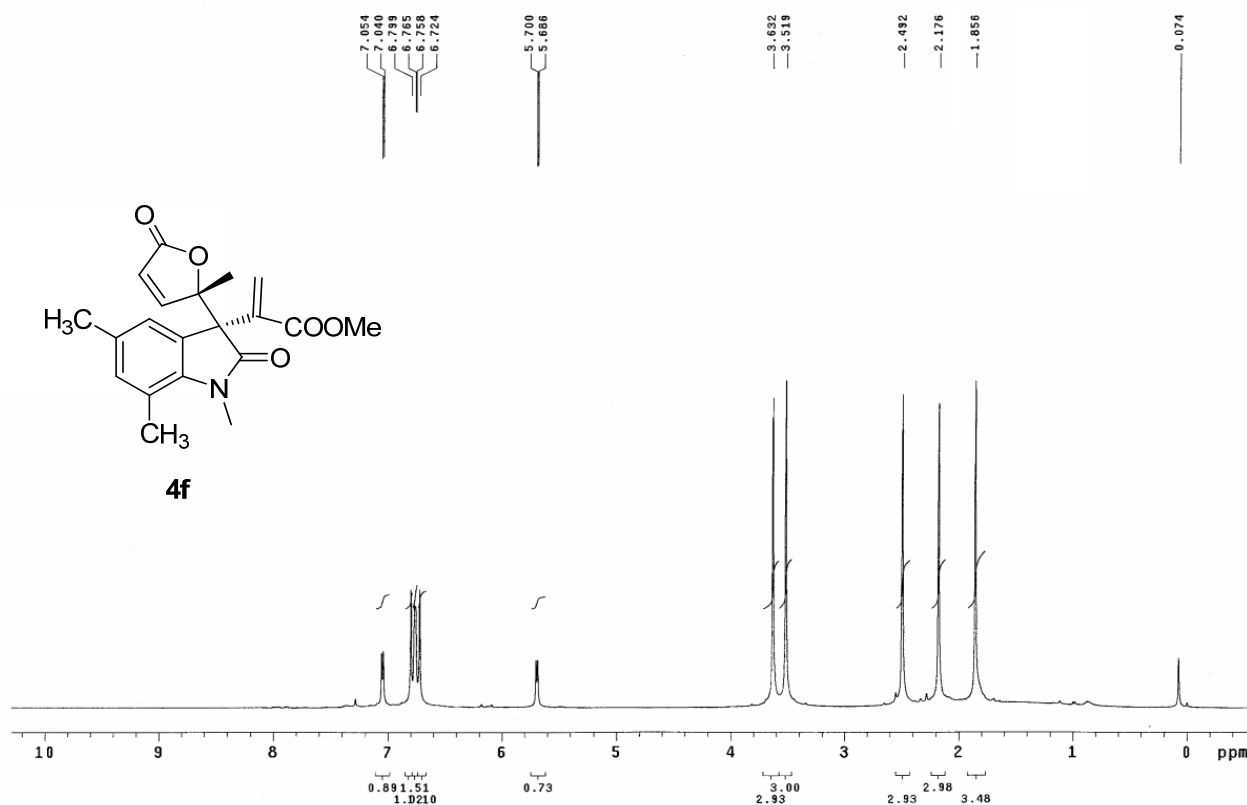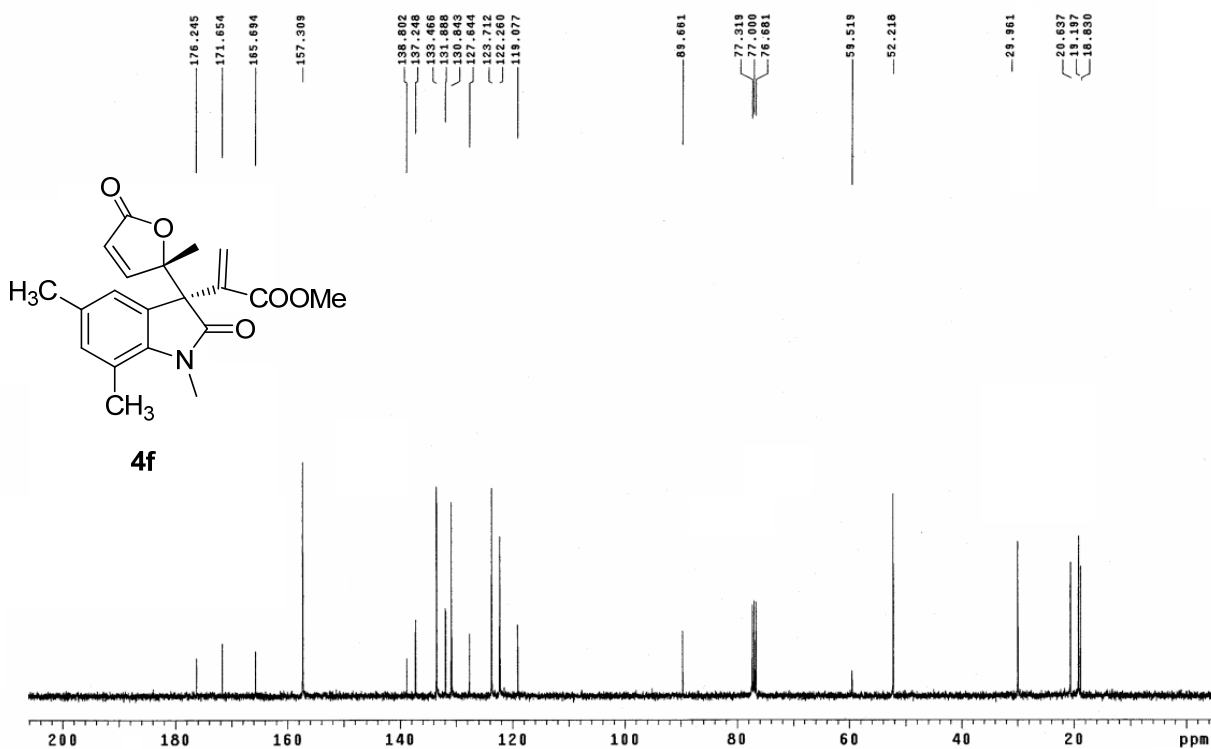

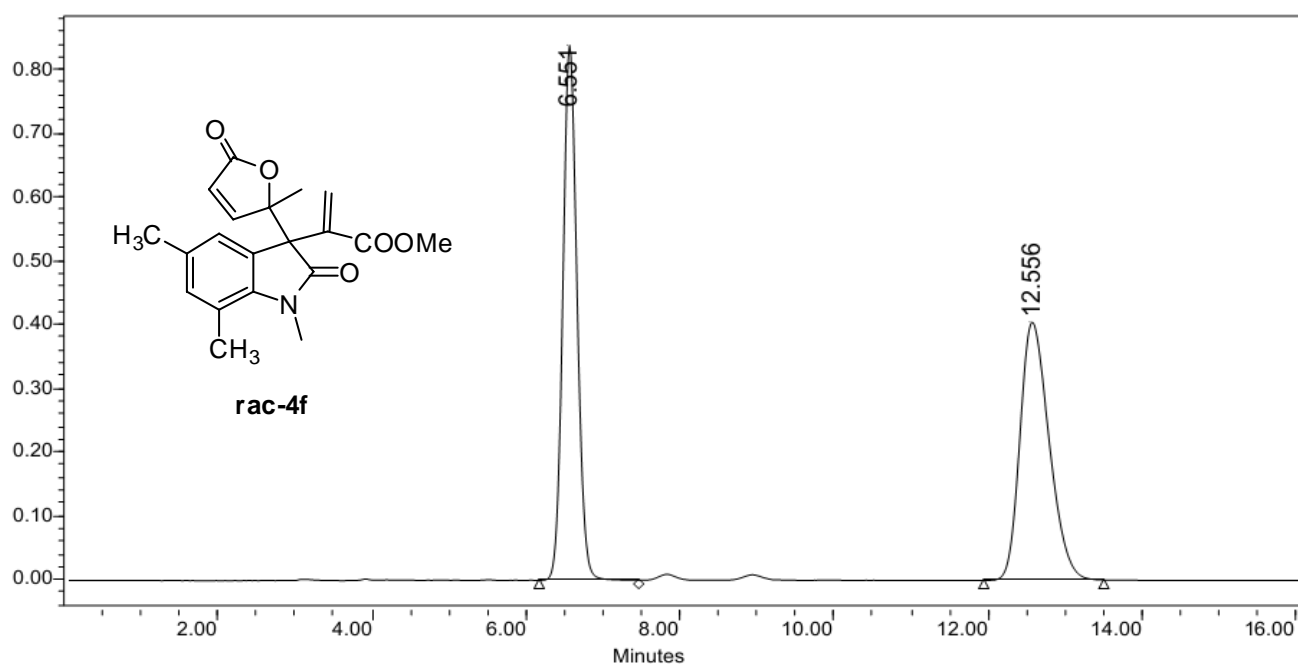

|   | RT<br>(min) | Area<br>( V *sec) | % Area | Height<br>( V ) | %<br>Height |
|---|-------------|-------------------|--------|-----------------|-------------|
| 1 | 6.551       | 10716013          | 50.15  | 839477          | 67.45       |
| 2 | 12.556      | 10653569          | 49.85  | 405024          | 32.55       |

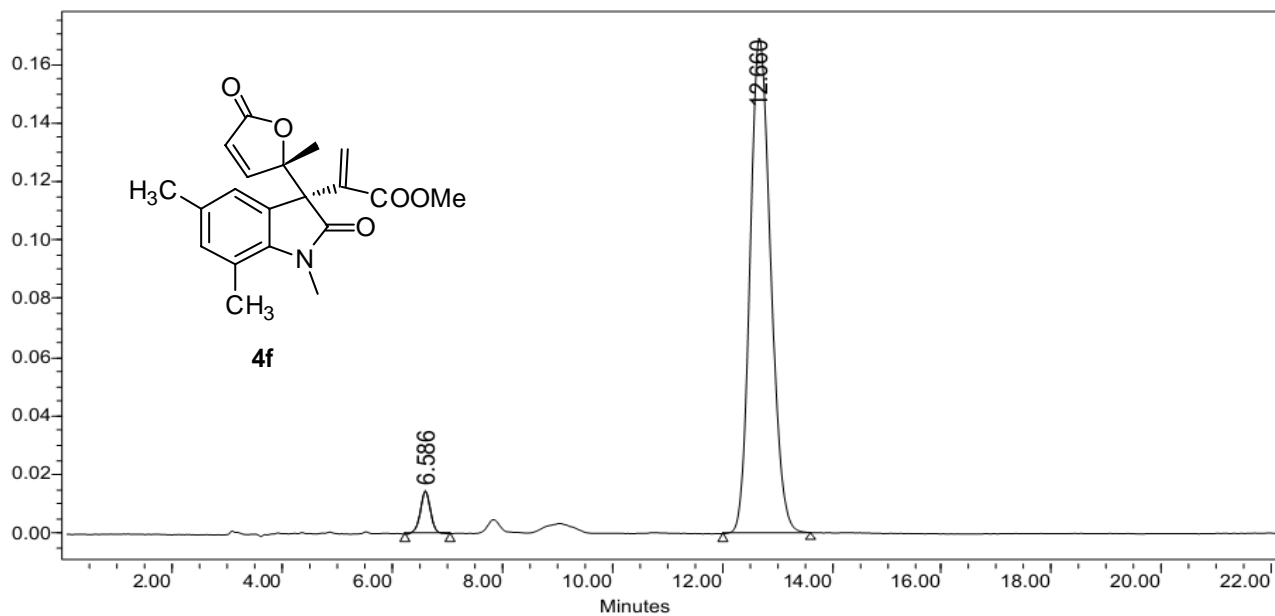

|   | RT<br>(min) | Area<br>( V *sec) | % Area | Height<br>( V ) | %<br>Height |
|---|-------------|-------------------|--------|-----------------|-------------|
| 1 | 6.586       | 190676            | 4.15   | 14529           | 7.92        |
| 2 | 12.660      | 4402915           | 95.85  | 168924          | 92.08       |

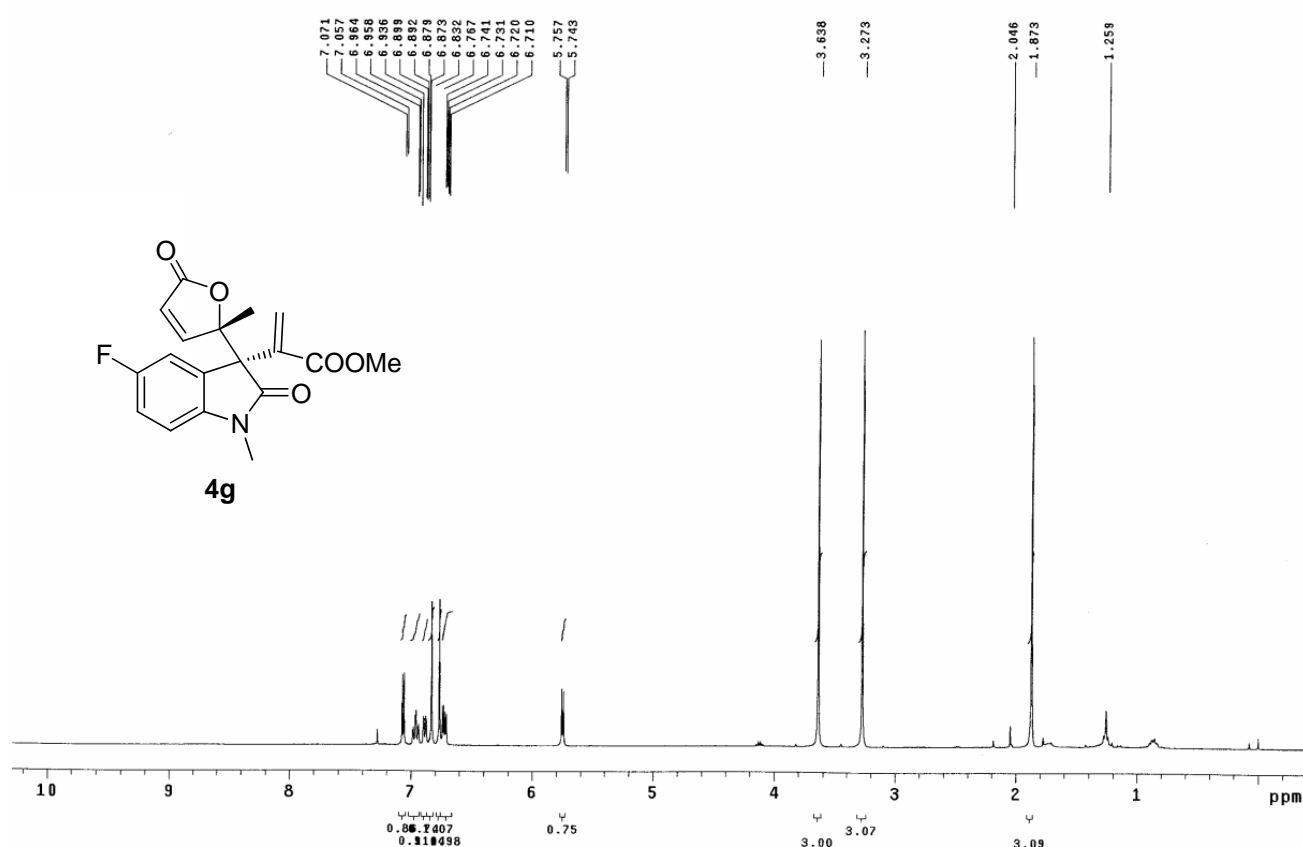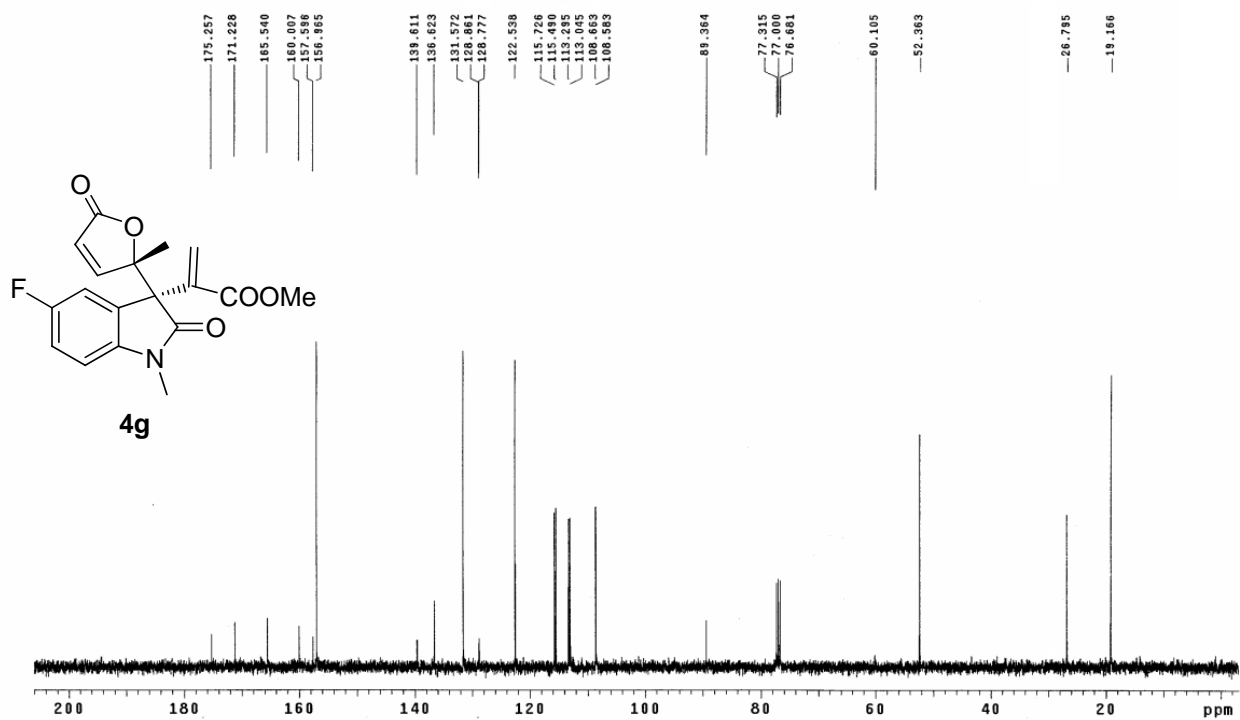

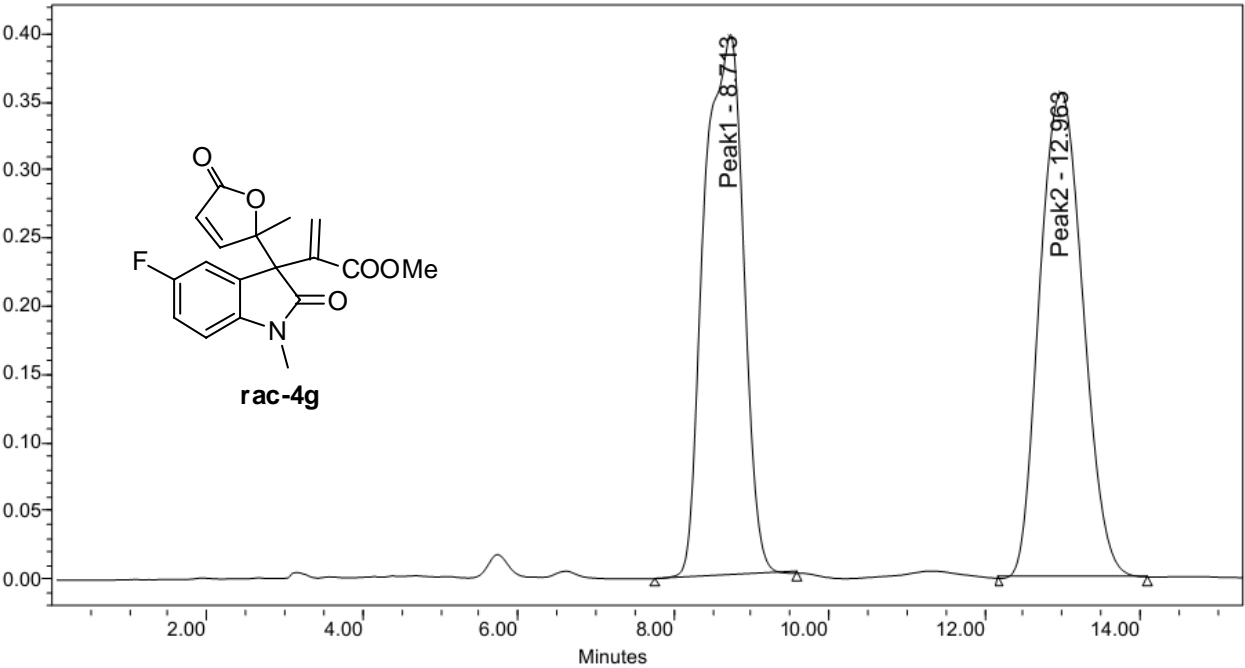

|   | Peak Name | RT (min) | Area ( V *sec) | % Area | Height ( V ) | % Height |
|---|-----------|----------|----------------|--------|--------------|----------|
| 1 | Peak1     | 8.713    | 13922205       | 50.15  | 397190       | 52.70    |
| 2 | Peak2     | 12.963   | 13838396       | 49.85  | 356535       | 47.30    |

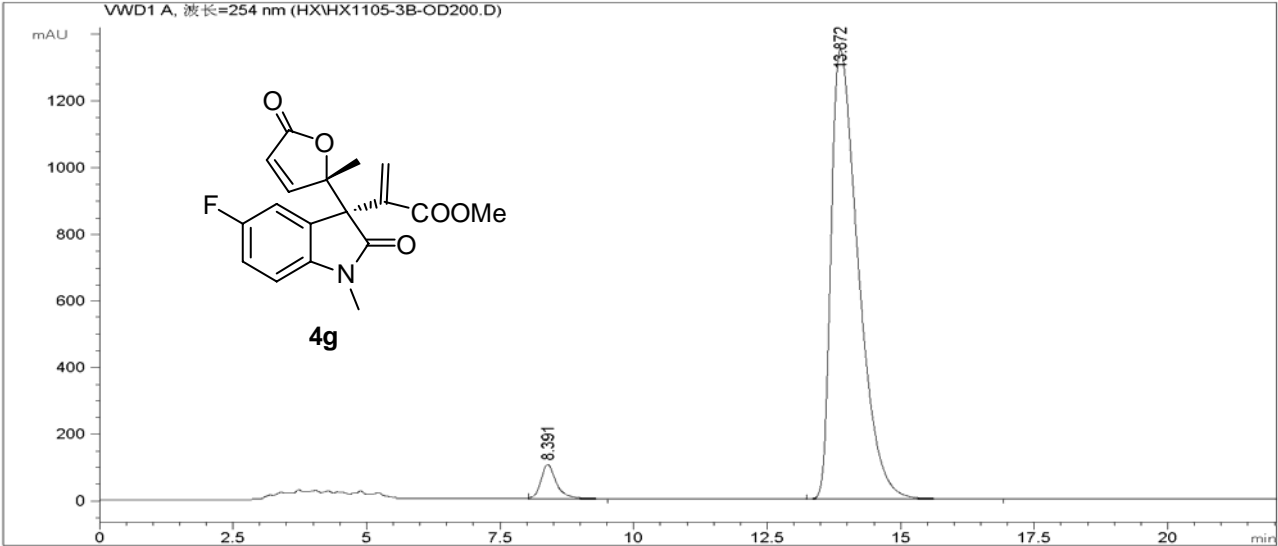

| 峰 # | 保留时间 [min] | 类型 | 峰宽 [min] | 峰面积 mAU *s | 峰高 [mAU]   | 峰面积 %   |
|-----|------------|----|----------|------------|------------|---------|
| 1   | 8.391      | VV | 0.2943   | 2045.96777 | 103.65731  | 4.1056  |
| 2   | 13.872     | VB | 0.5414   | 4.77881e4  | 1348.97253 | 95.8944 |

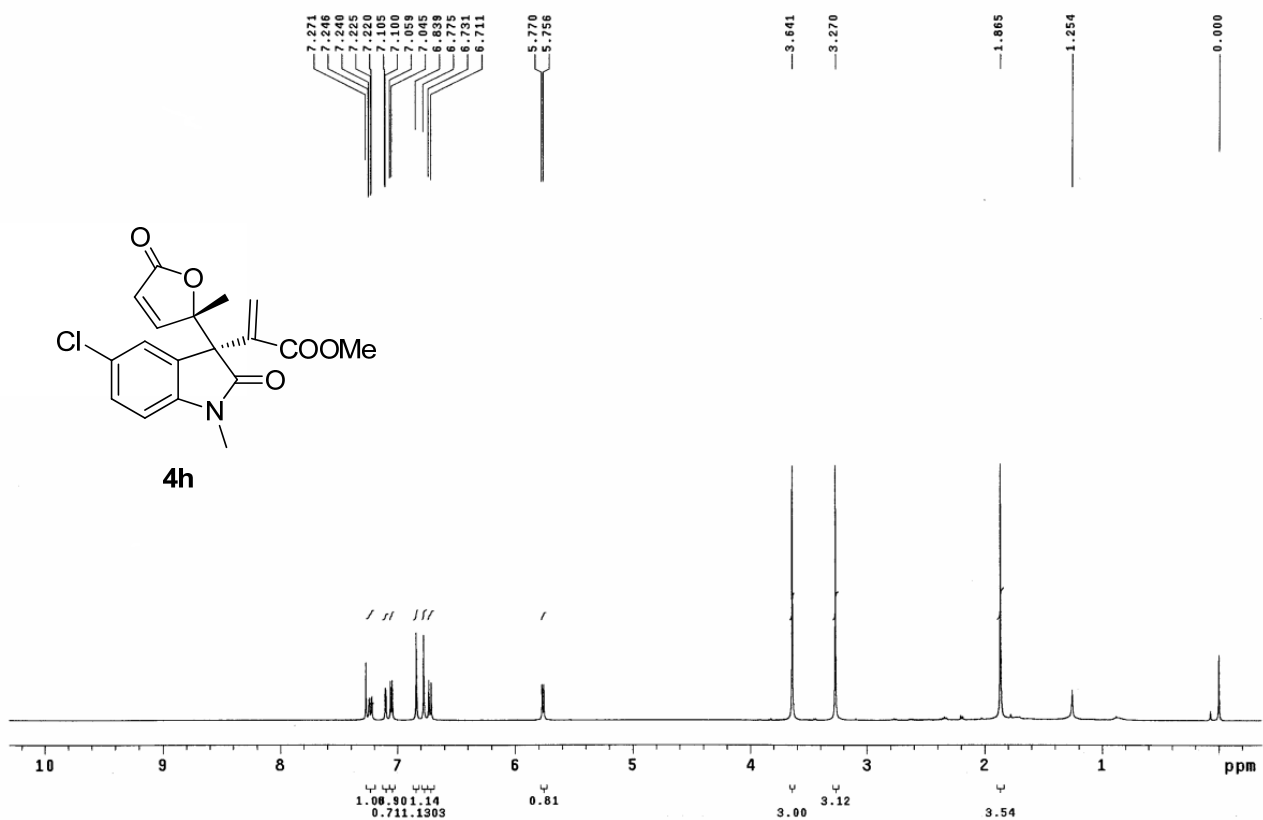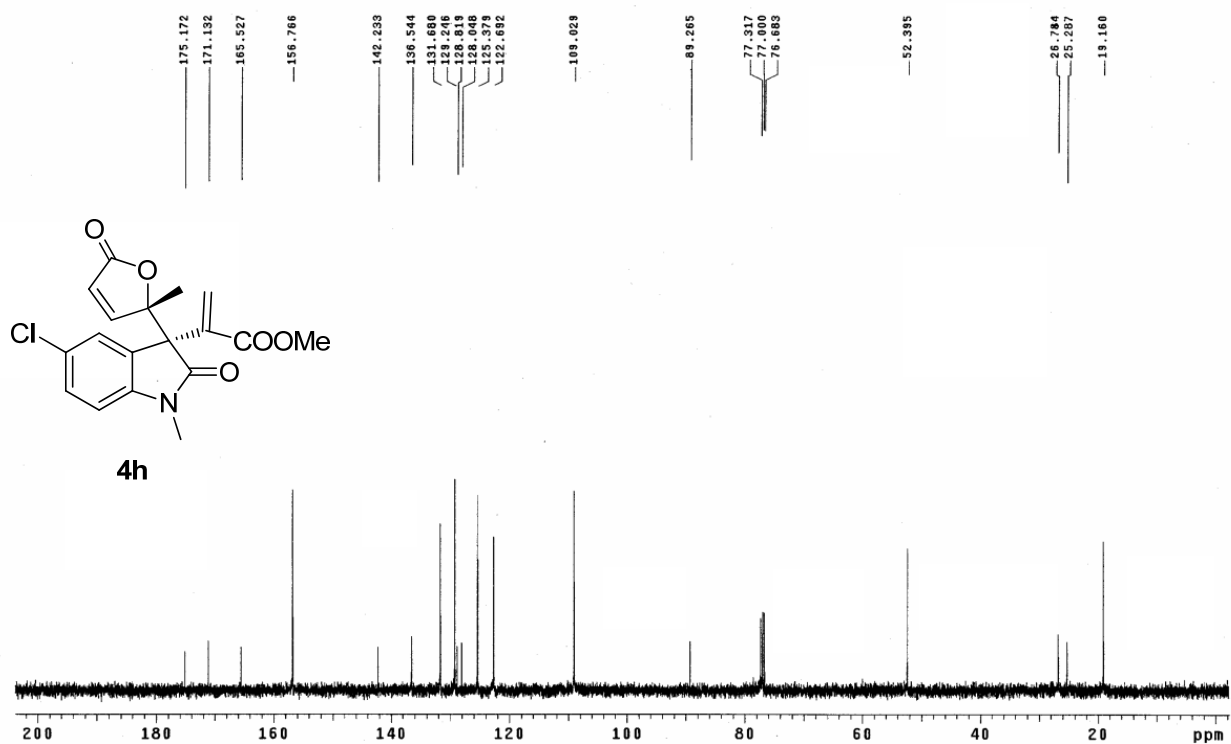

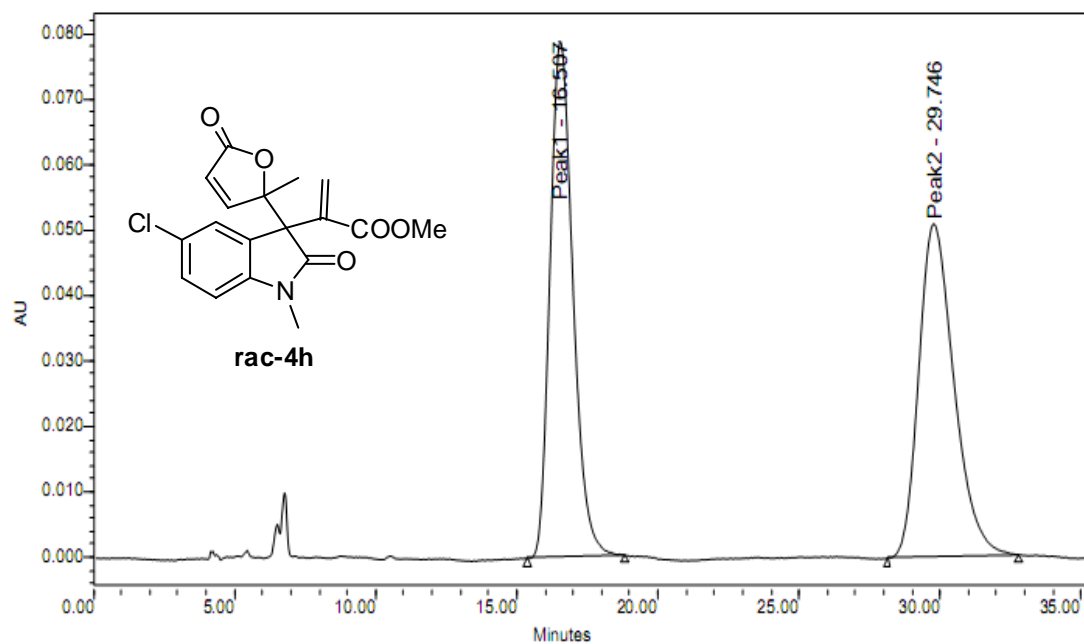

|   | Peak Name | RT (min) | Area ( V *sec) | % Area | Height ( V ) | % Height |
|---|-----------|----------|----------------|--------|--------------|----------|
| 1 | Peak1     | 16.507   | 4468800        | 50.25  | 78909        | 60.78    |
| 2 | Peak2     | 29.746   | 4423872        | 49.75  | 50918        | 39.22    |

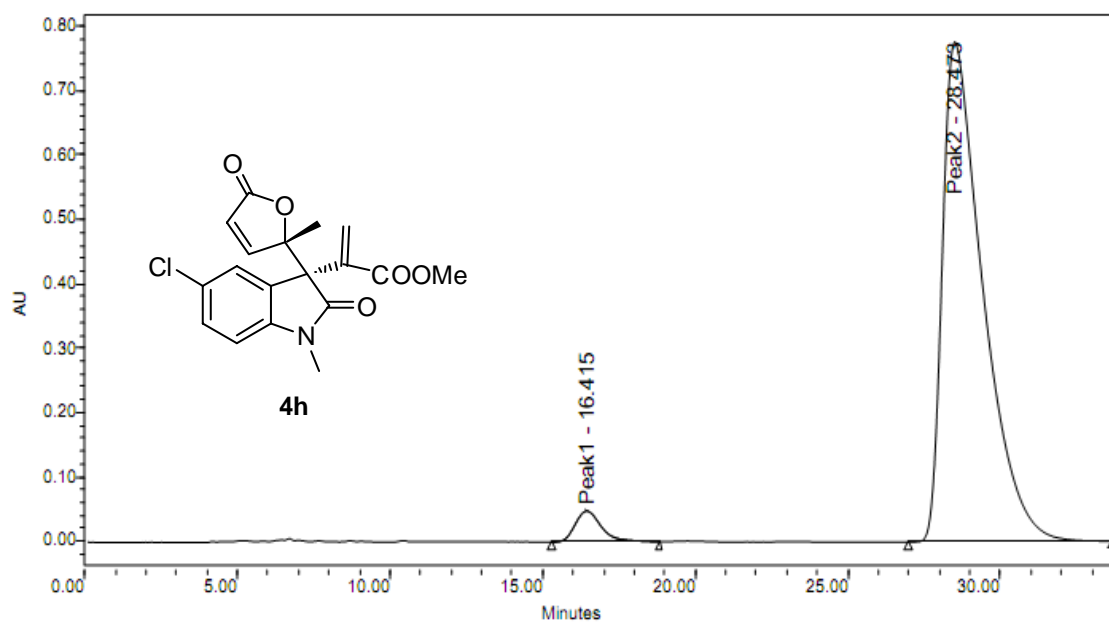

|   | Peak Name | RT (min) | Area ( V *sec) | % Area | Height ( V ) | % Height |
|---|-----------|----------|----------------|--------|--------------|----------|
| 1 | Peak1     | 16.415   | 2850288        | 3.83   | 48028        | 5.82     |
| 2 | Peak2     | 28.473   | 71554621       | 96.17  | 777192       | 94.18    |

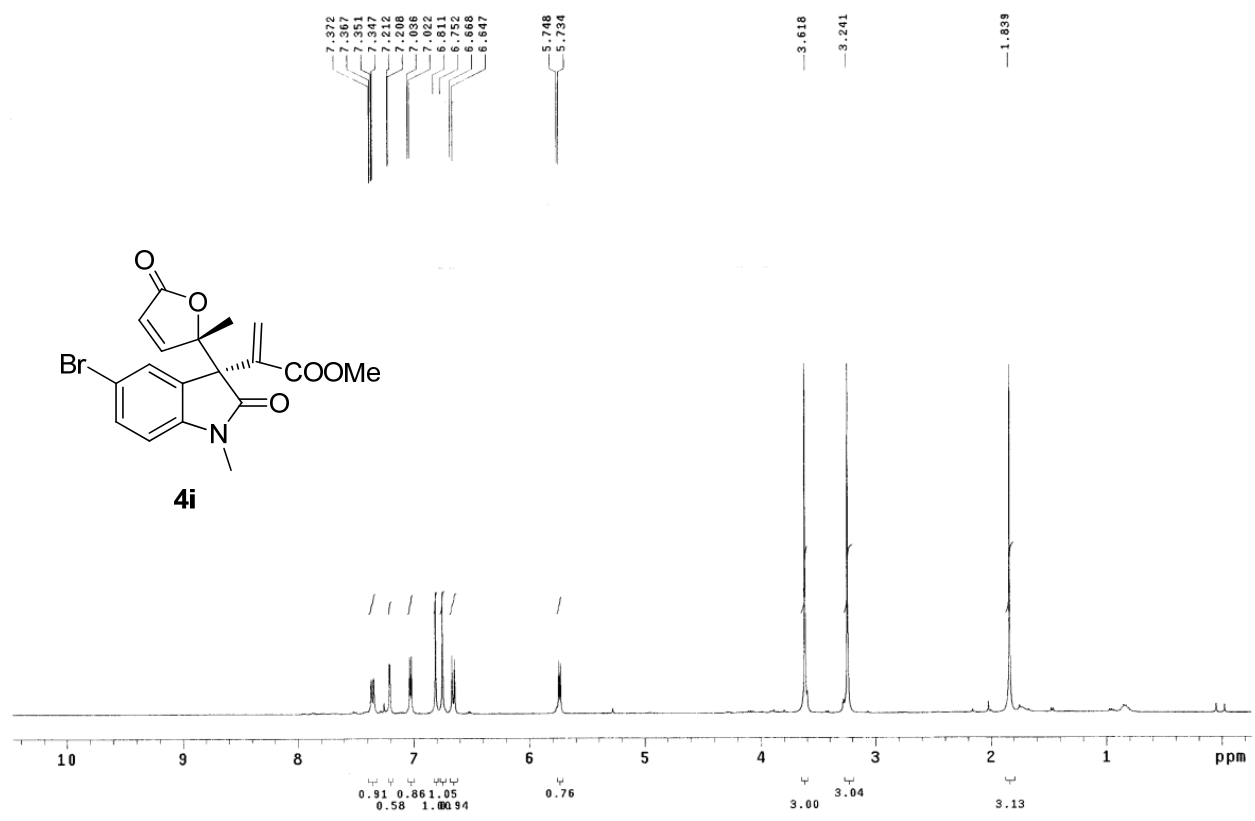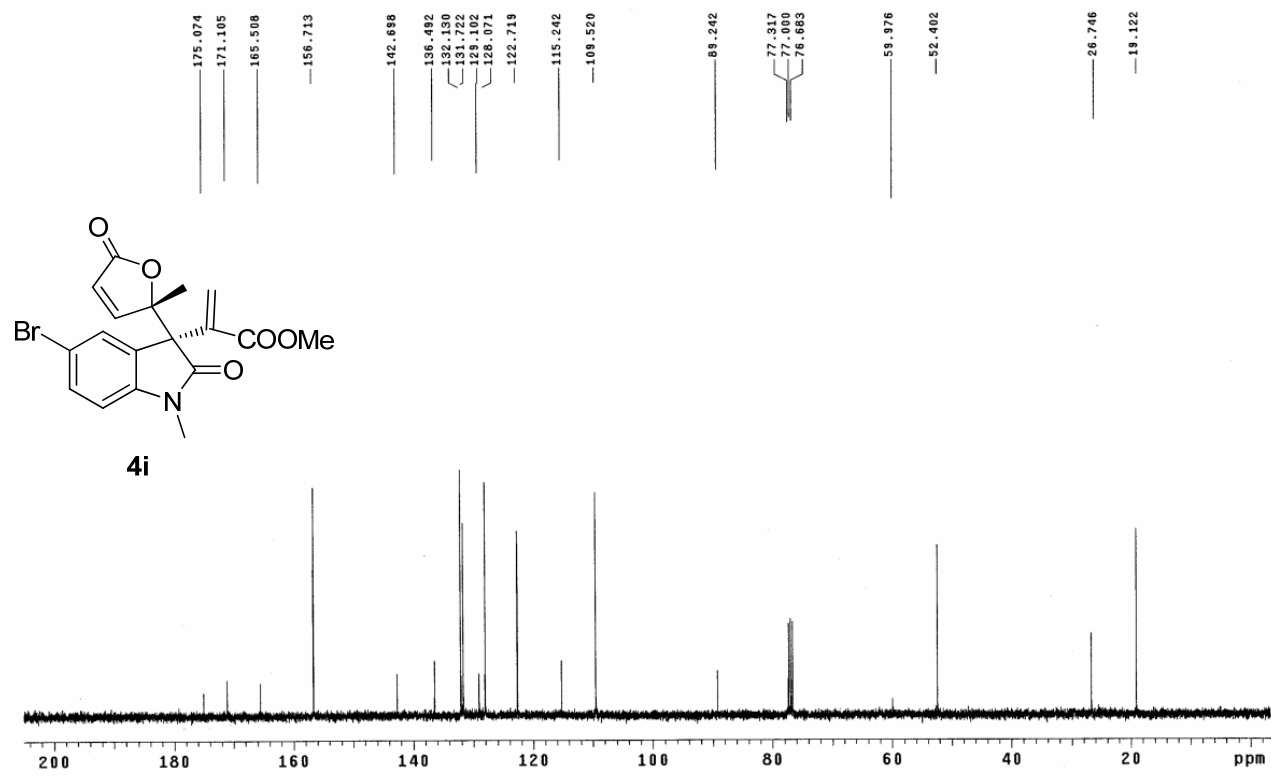



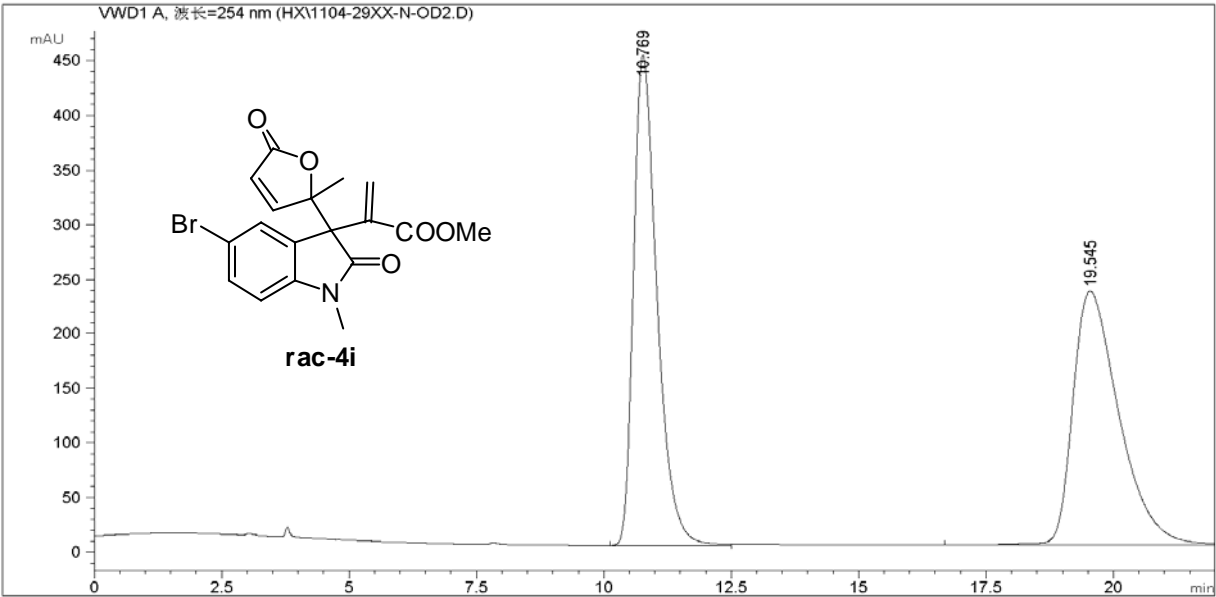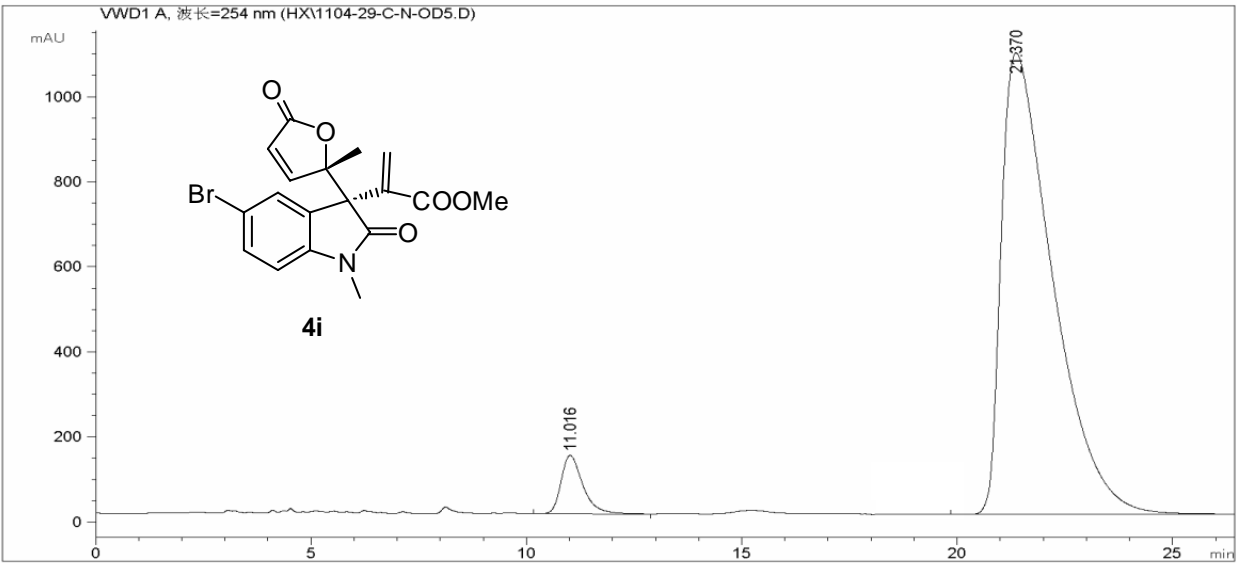

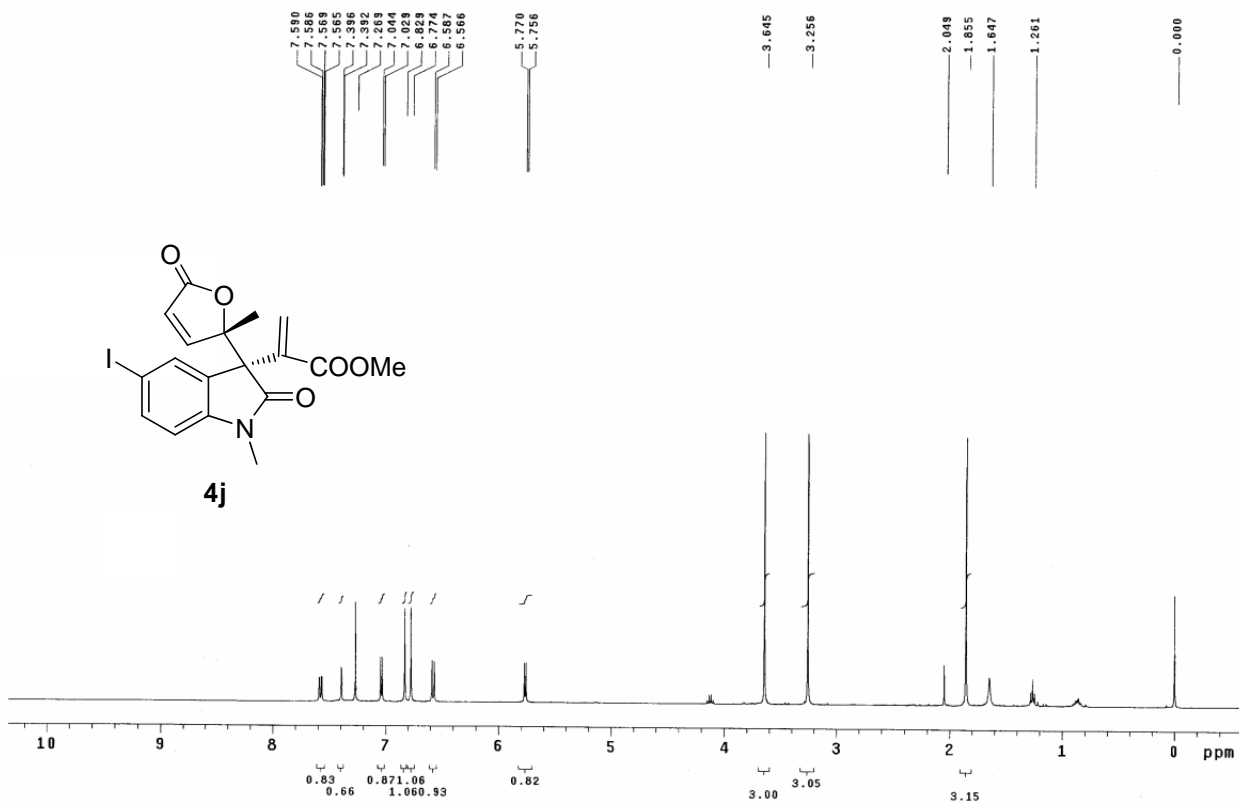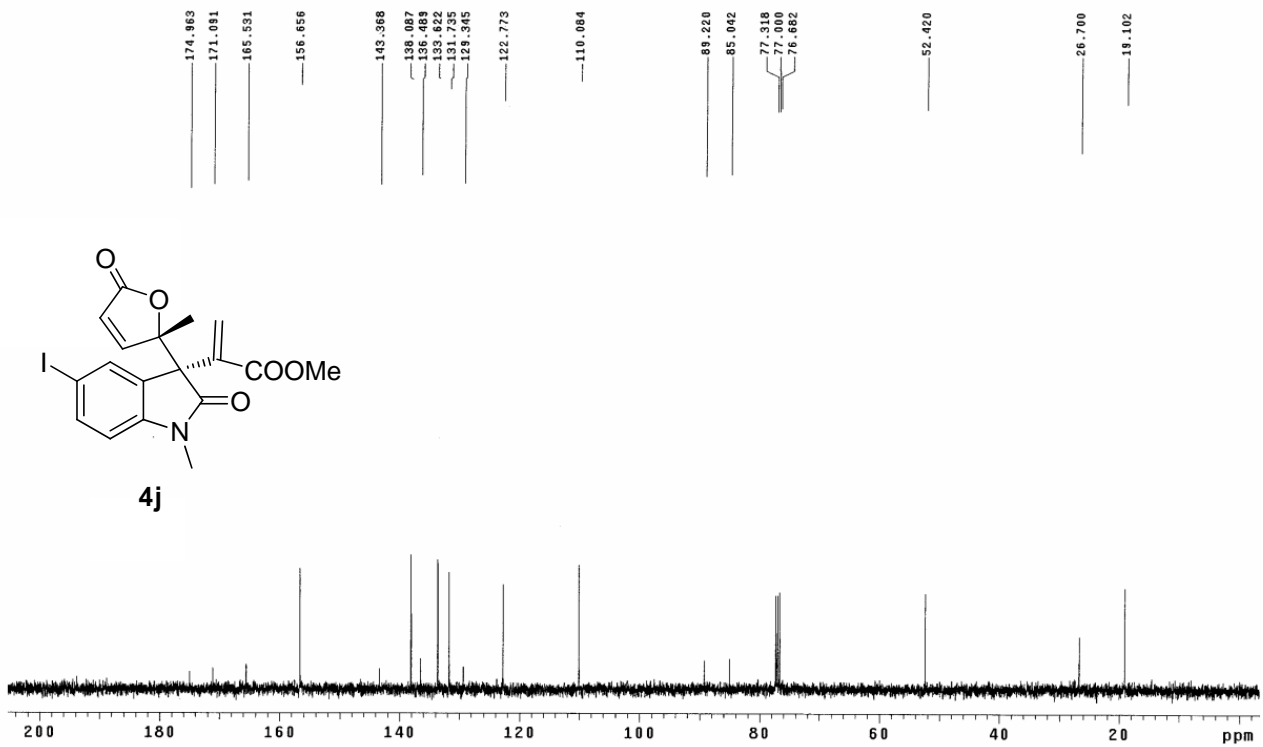

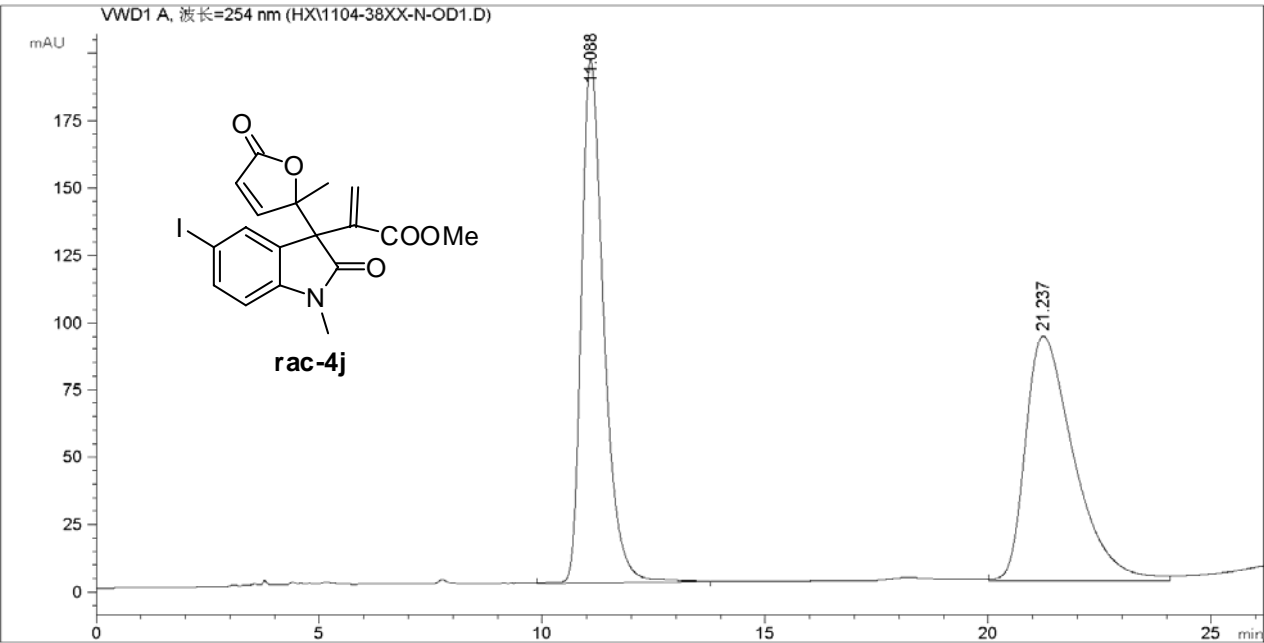

| 峰 # | 保留时间 [min] | 类型 | 峰宽 [min] | 峰面积 mAU *s | 峰高 [mAU]  | 峰面积 %   |
|-----|------------|----|----------|------------|-----------|---------|
| 1   | 11.088     | BB | 0.5299   | 6786.74951 | 194.25641 | 49.7116 |
| 2   | 21.237     | BB | 1.1414   | 6865.48682 | 91.08699  | 50.2884 |

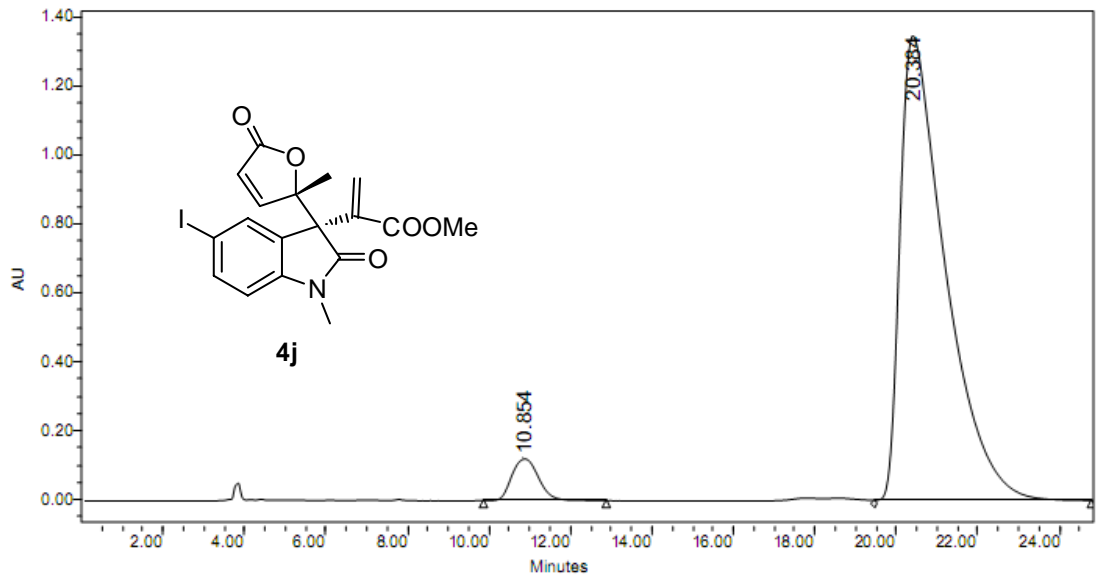

|   | RT (min) | Area (V *sec) | % Area | Height (V) | % Height |
|---|----------|---------------|--------|------------|----------|
| 1 | 10.854   | 5542041       | 5.06   | 121024     | 8.24     |
| 2 | 20.384   | 103923702     | 94.94  | 1347531    | 91.76    |

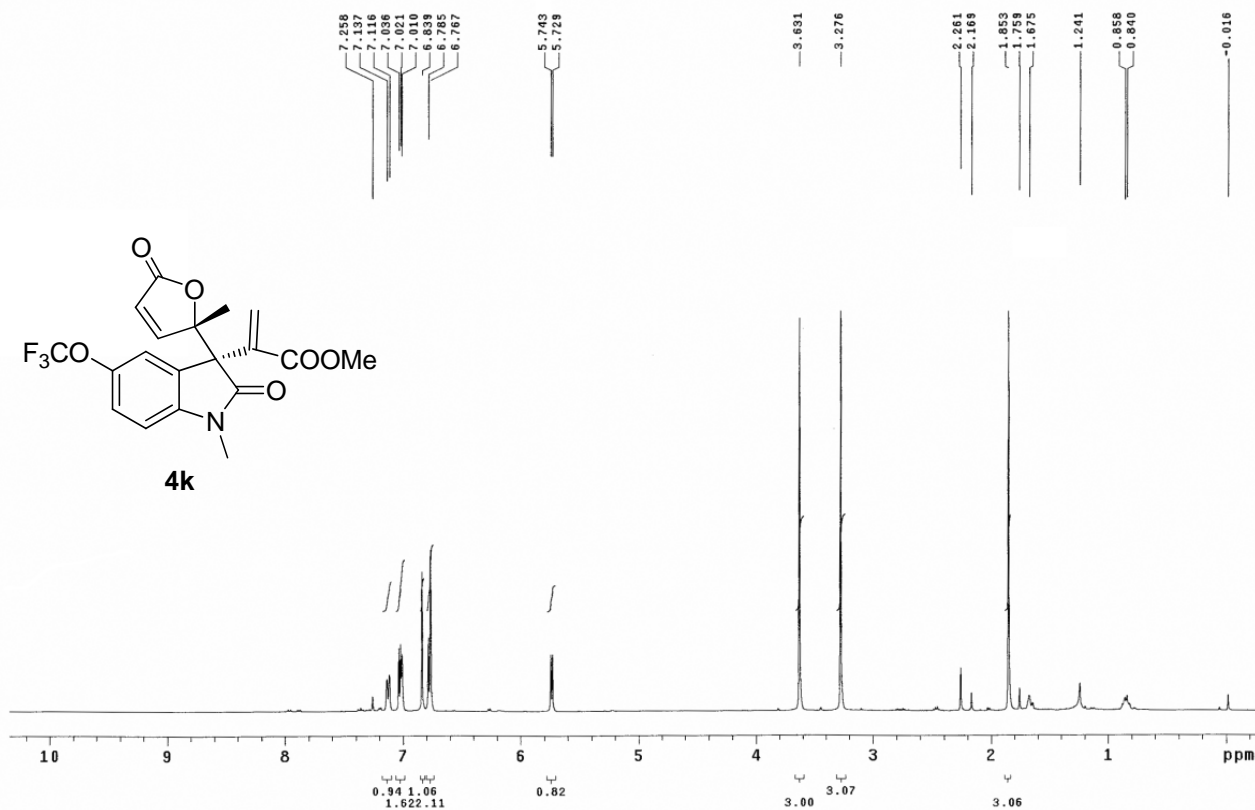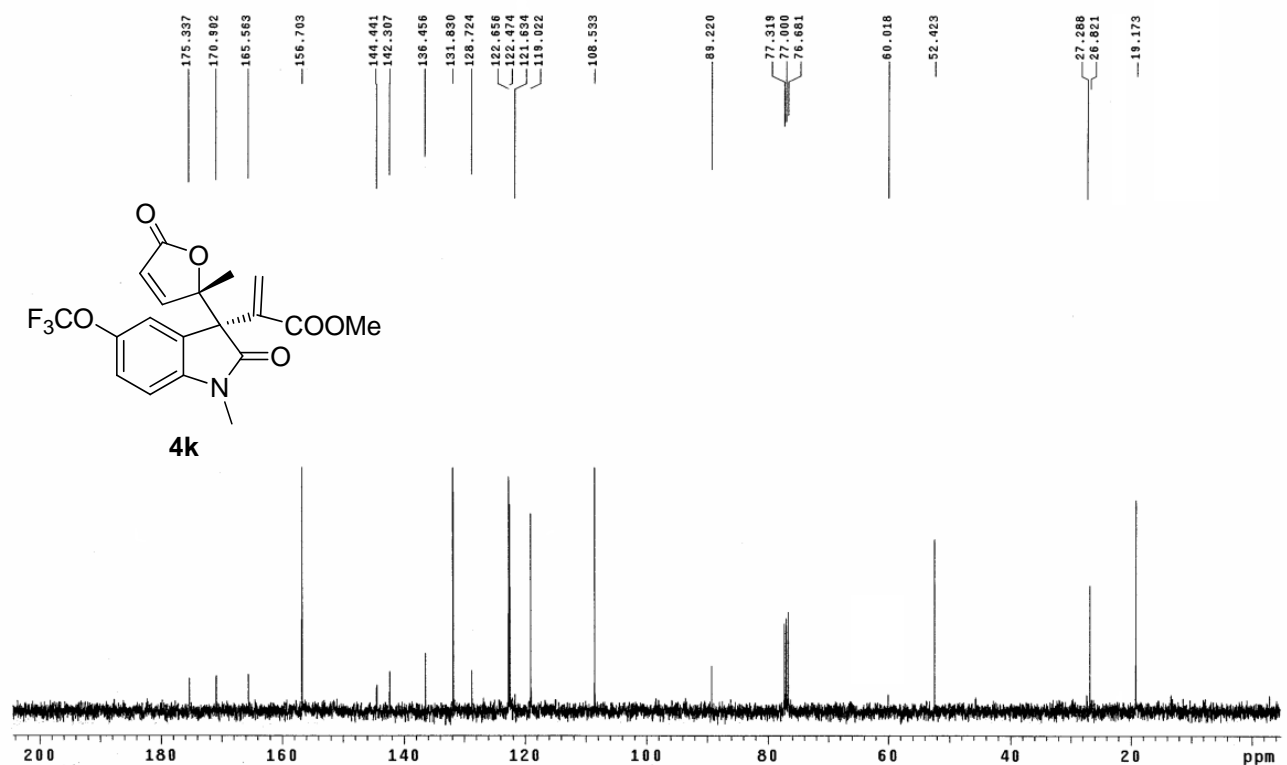

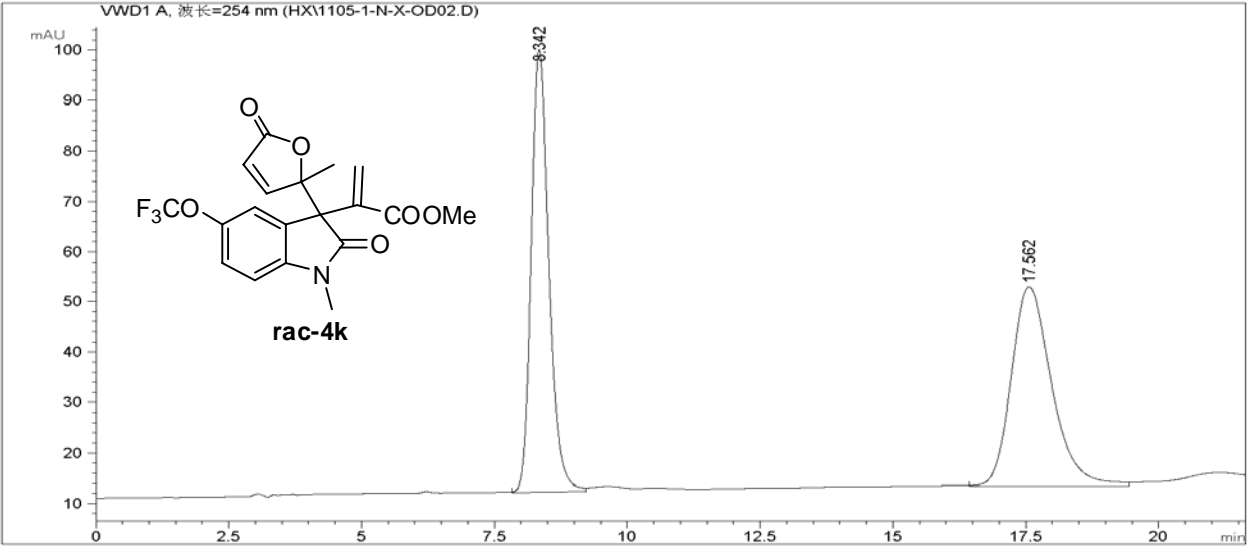

| 峰 # | 保留时间 [min] | 类型 | 峰宽 [min] | 峰面积 mAU * s | 峰高 [mAU] | 峰面积 %   |
|-----|------------|----|----------|-------------|----------|---------|
| 1   | 8.342      | BV | 0.3509   | 2027.46423  | 87.82693 | 49.2600 |
| 2   | 17.562     | BB | 0.8066   | 2088.37720  | 39.65810 | 50.7400 |

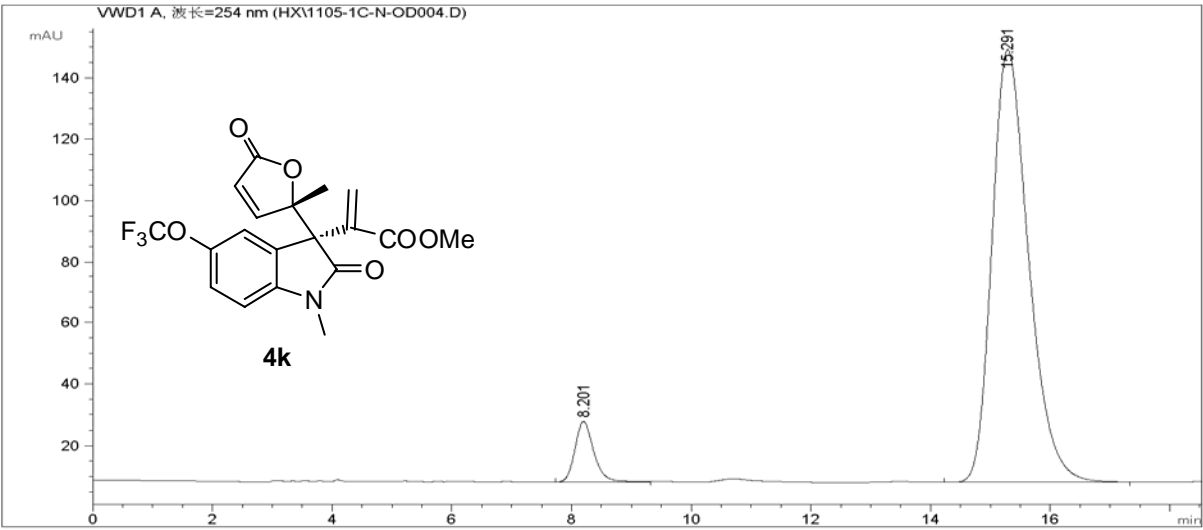

| 峰 # | 保留时间 [min] | 类型 | 峰宽 [min] | 峰面积 mAU * s | 峰高 [mAU]  | 峰面积 %   |
|-----|------------|----|----------|-------------|-----------|---------|
| 1   | 8.201      | BB | 0.3343   | 433.77298   | 19.57243  | 6.7566  |
| 2   | 15.291     | VB | 0.6583   | 5986.25537  | 141.01189 | 93.2434 |

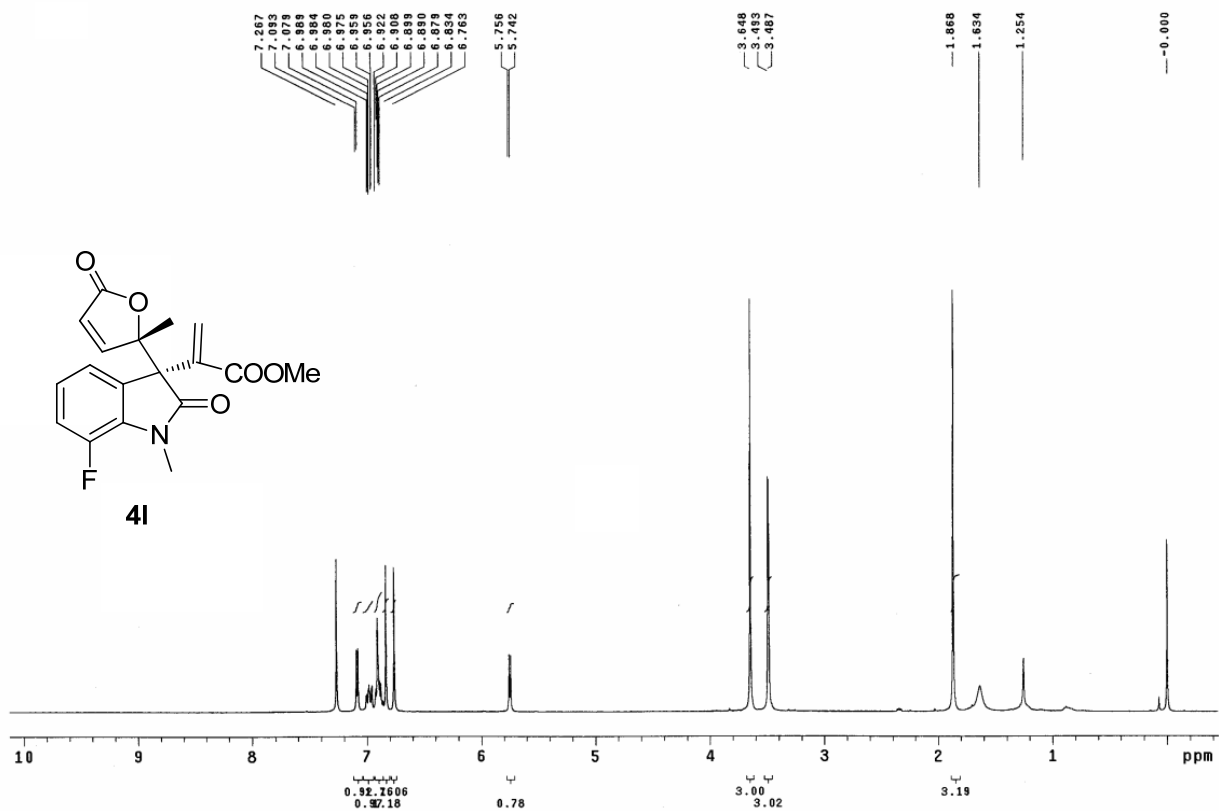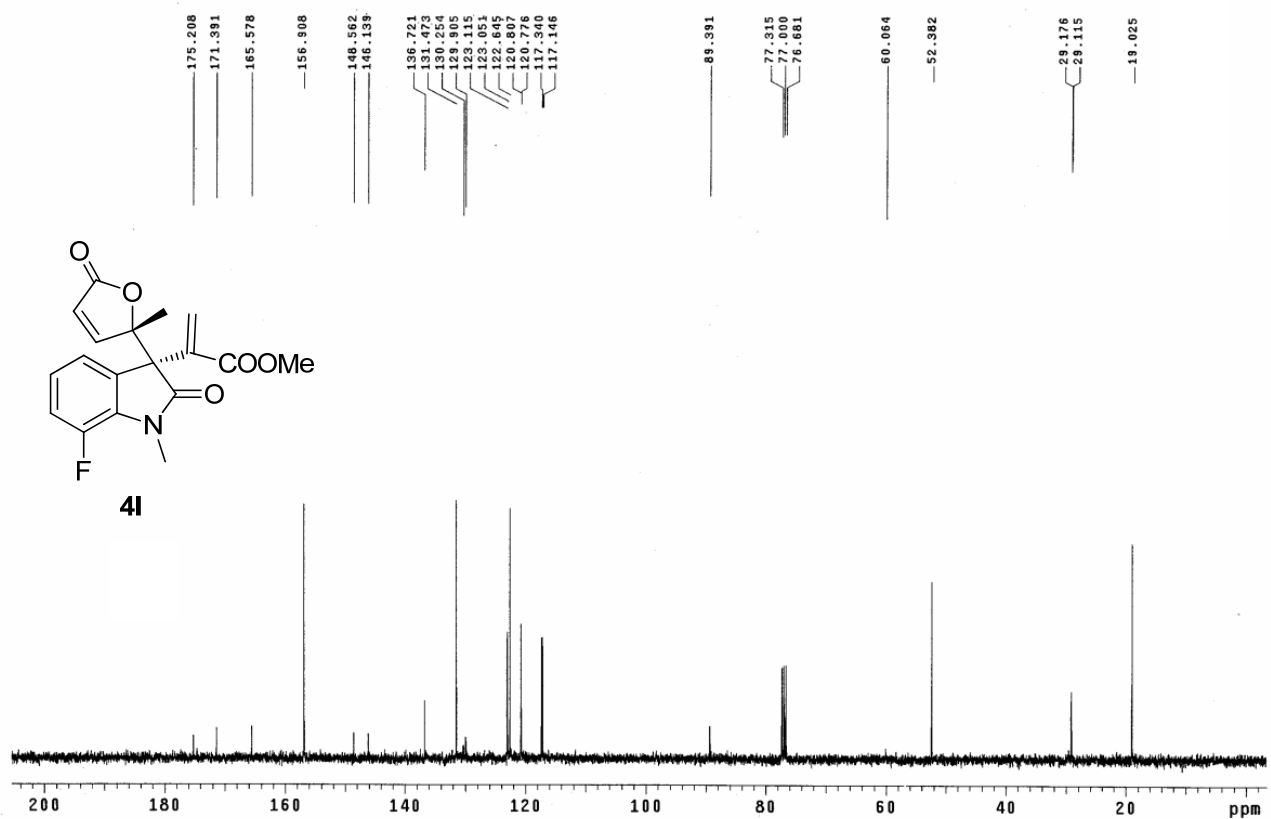

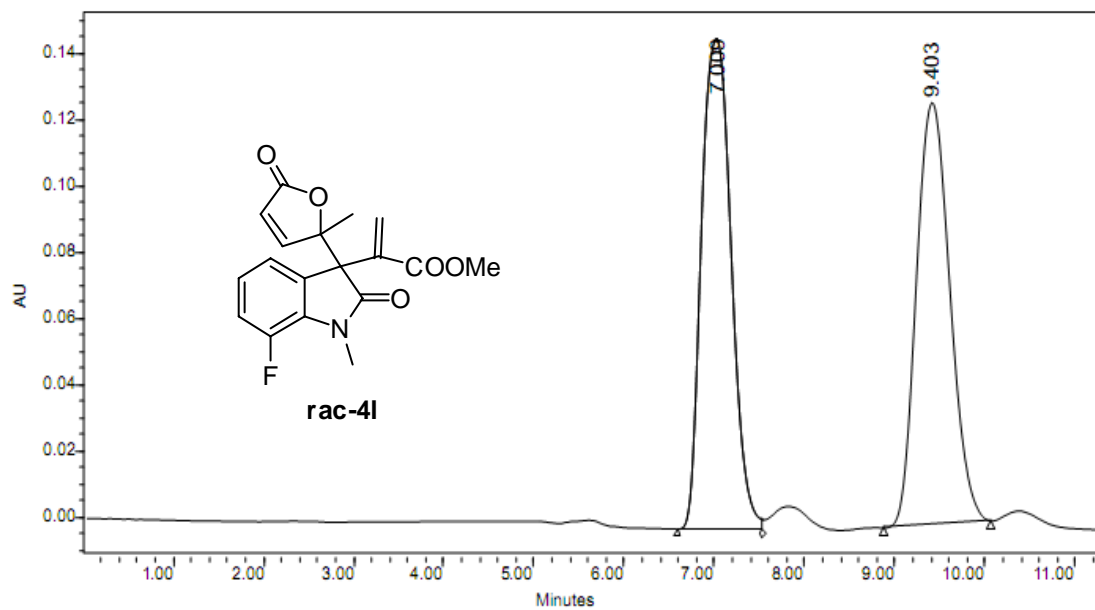

|   | RT<br>(min) | Area<br>( V *sec) | % Area | Height<br>( V ) | %<br>Height |
|---|-------------|-------------------|--------|-----------------|-------------|
| 1 | 7.009       | 3395882           | 50.79  | 148287          | 53.77       |
| 2 | 9.403       | 3289654           | 49.21  | 127483          | 46.23       |

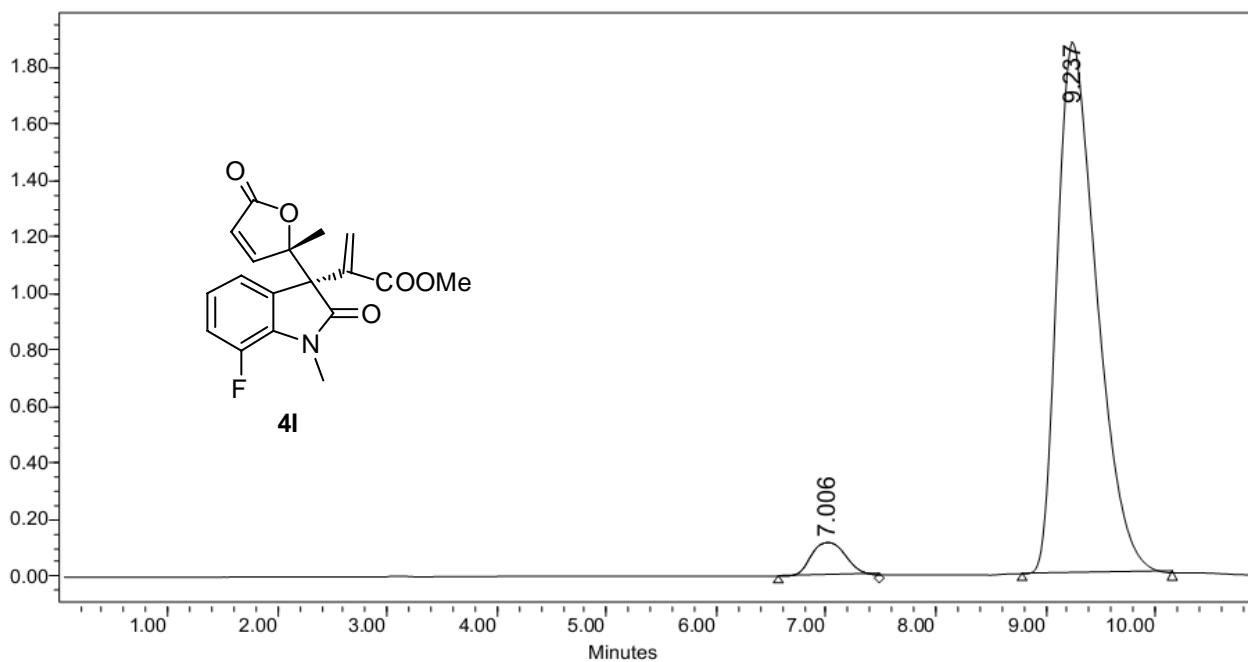

|   | RT<br>(min) | Area<br>( V *sec) | % Area | Height<br>( V ) | %<br>Height |
|---|-------------|-------------------|--------|-----------------|-------------|
| 1 | 7.006       | 2613011           | 5.23   | 117281          | 5.86        |
| 2 | 9.237       | 47320700          | 94.77  | 1884370         | 94.14       |

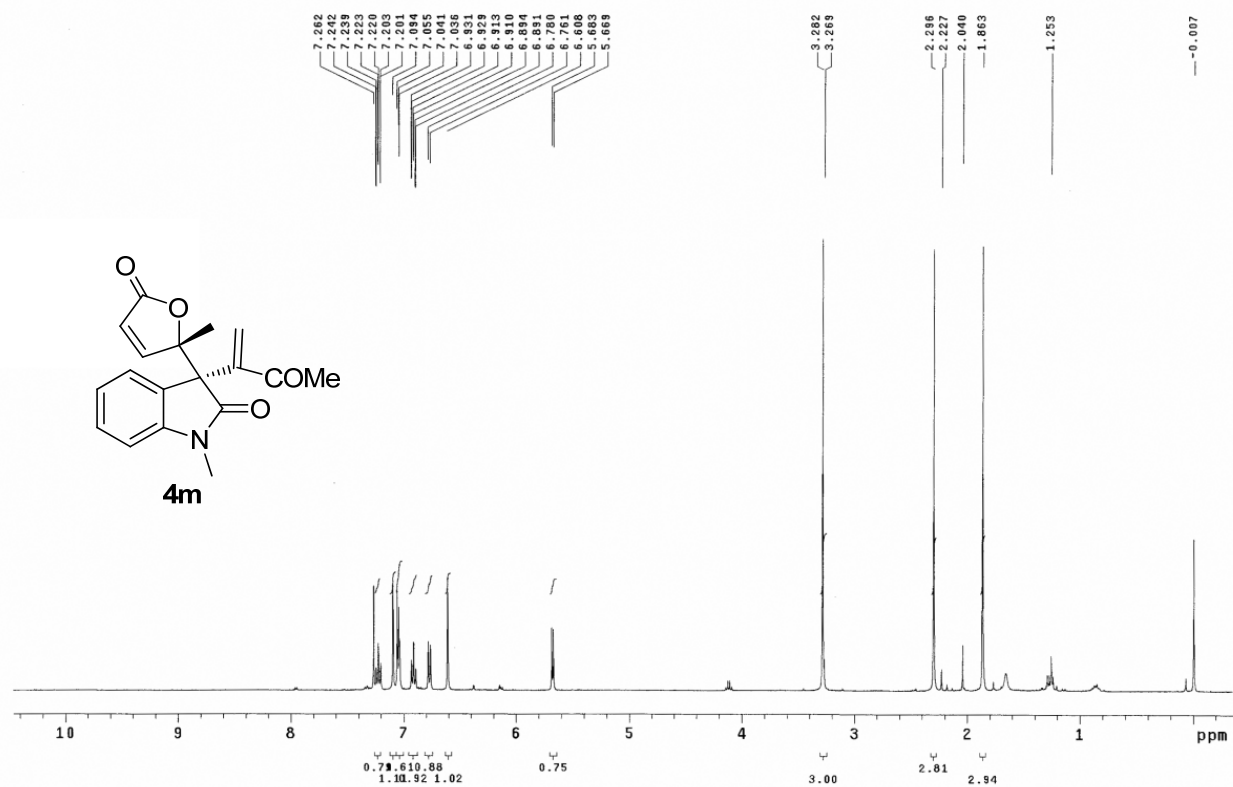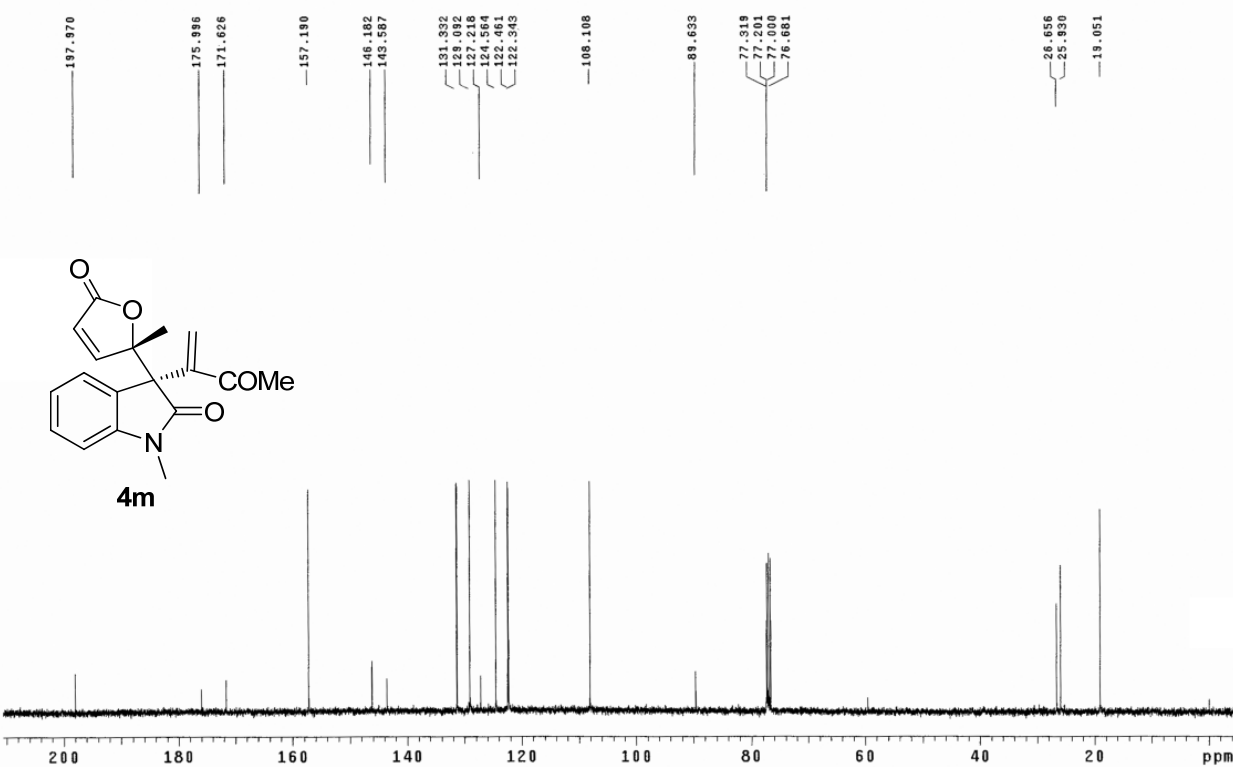



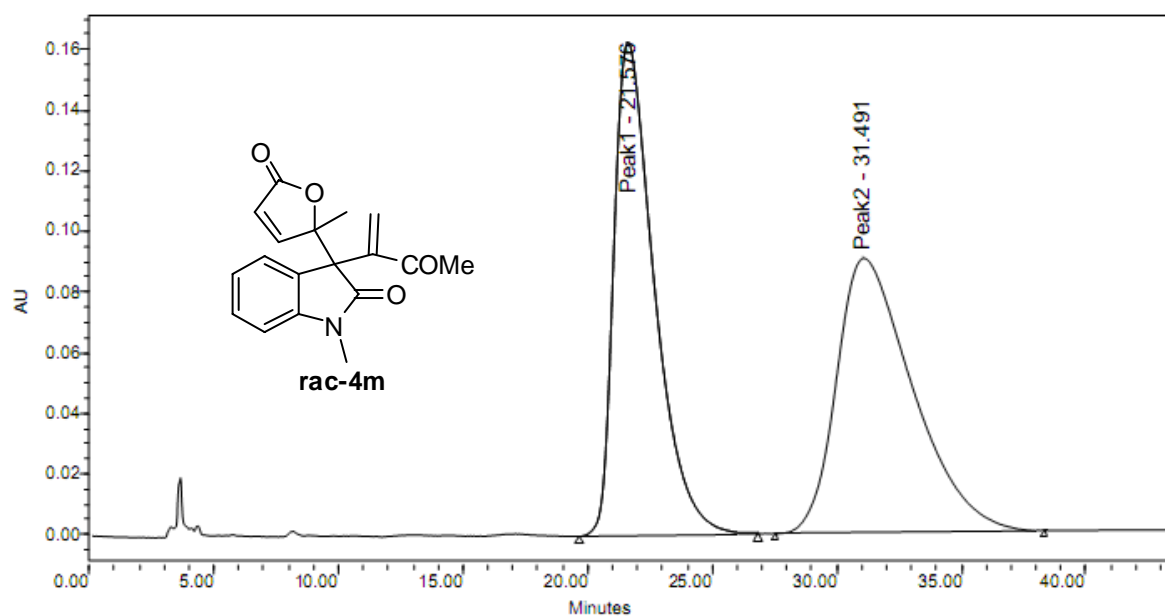

|   | Peak Name | RT (min) | Area (V *sec) | % Area | Height (V) | % Height |
|---|-----------|----------|---------------|--------|------------|----------|
| 1 | Peak1     | 21.576   | 18462292      | 48.77  | 162841     | 64.25    |
| 2 | Peak2     | 31.491   | 19396275      | 51.23  | 90610      | 35.75    |

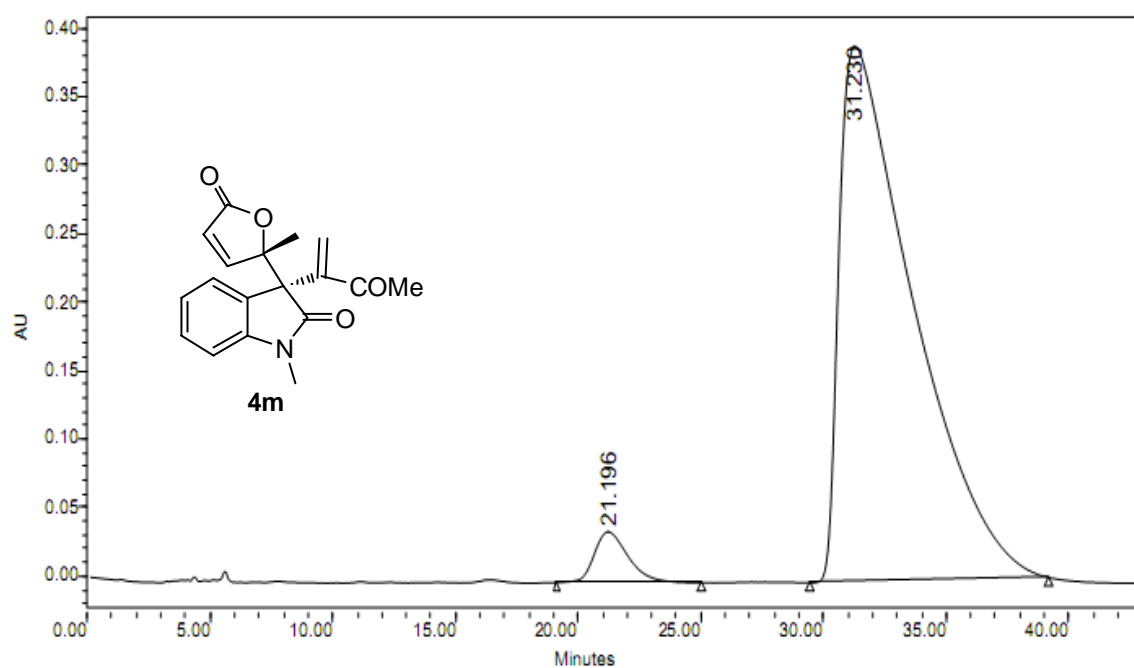

|   | RT (min) | Area (V *sec) | % Area | Height (V) | % Height |
|---|----------|---------------|--------|------------|----------|
| 1 | 21.196   | 3588846       | 4.18   | 37025      | 8.65     |
| 2 | 31.230   | 82248507      | 95.82  | 391052     | 91.35    |

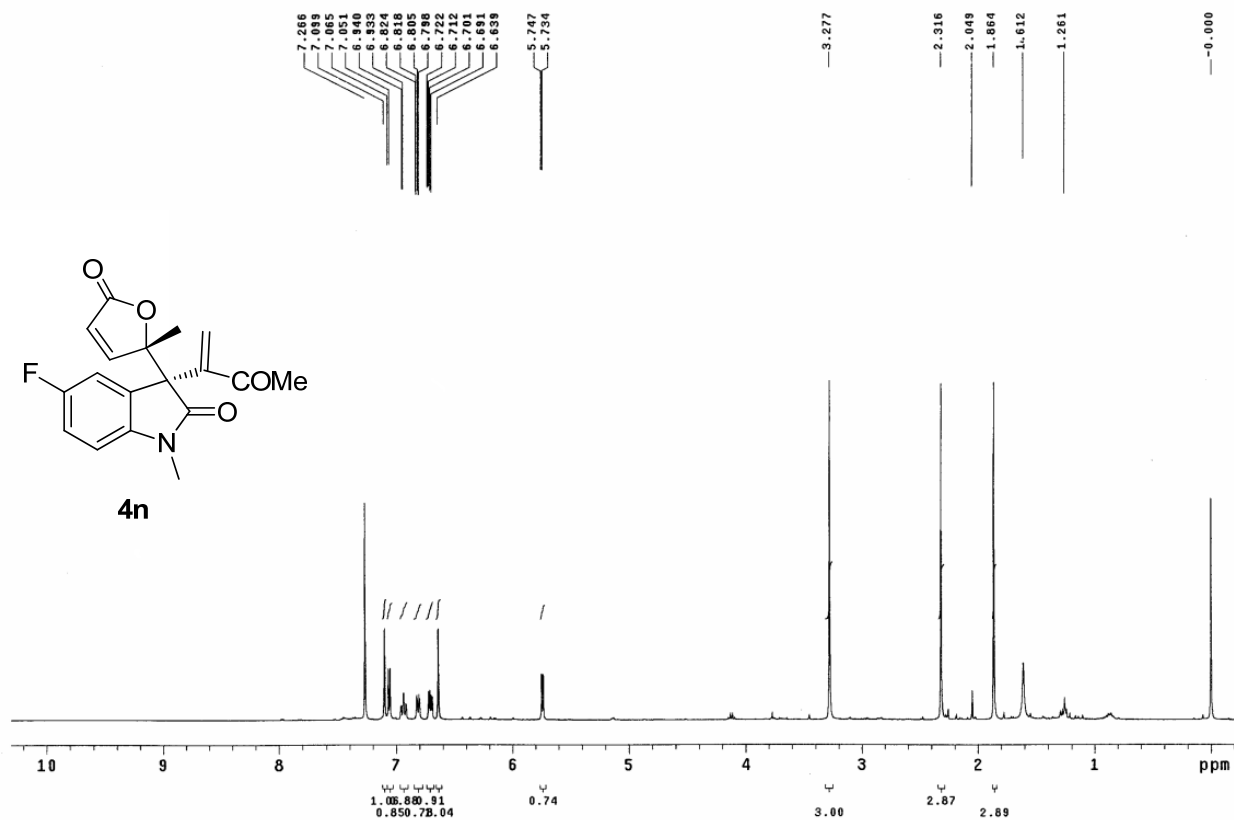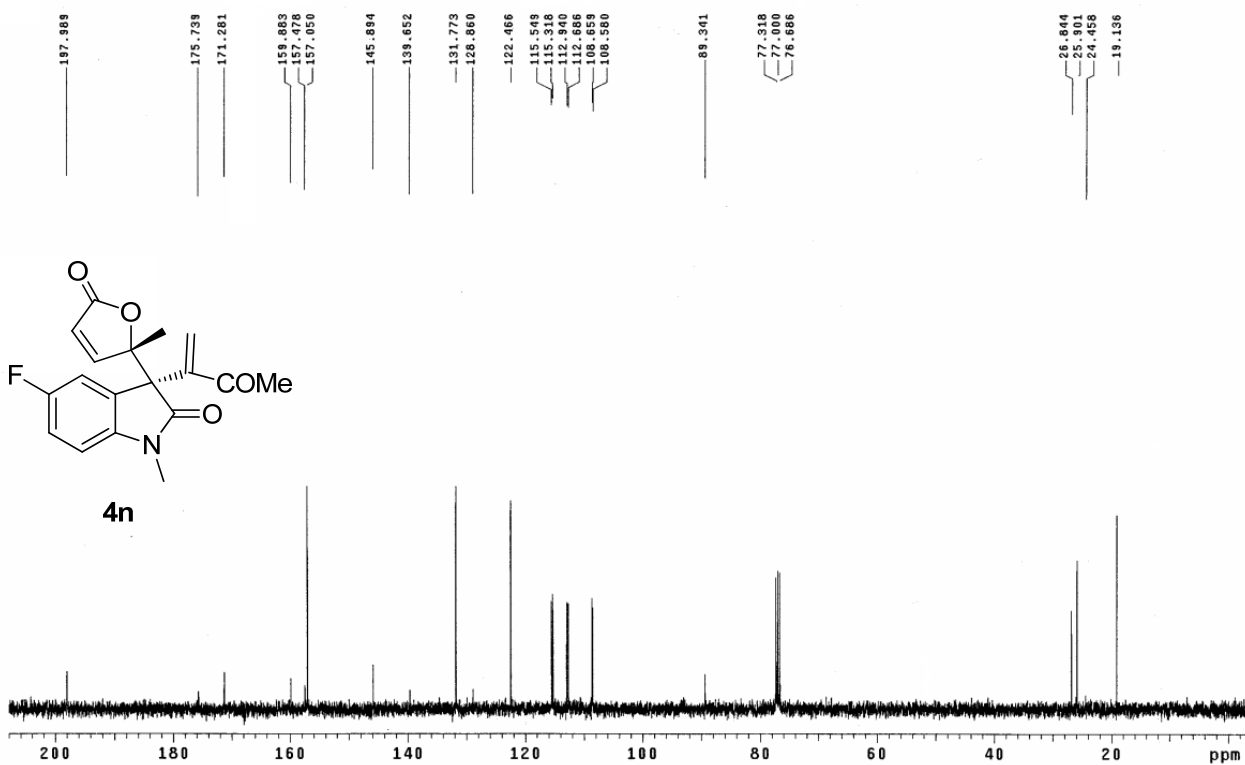

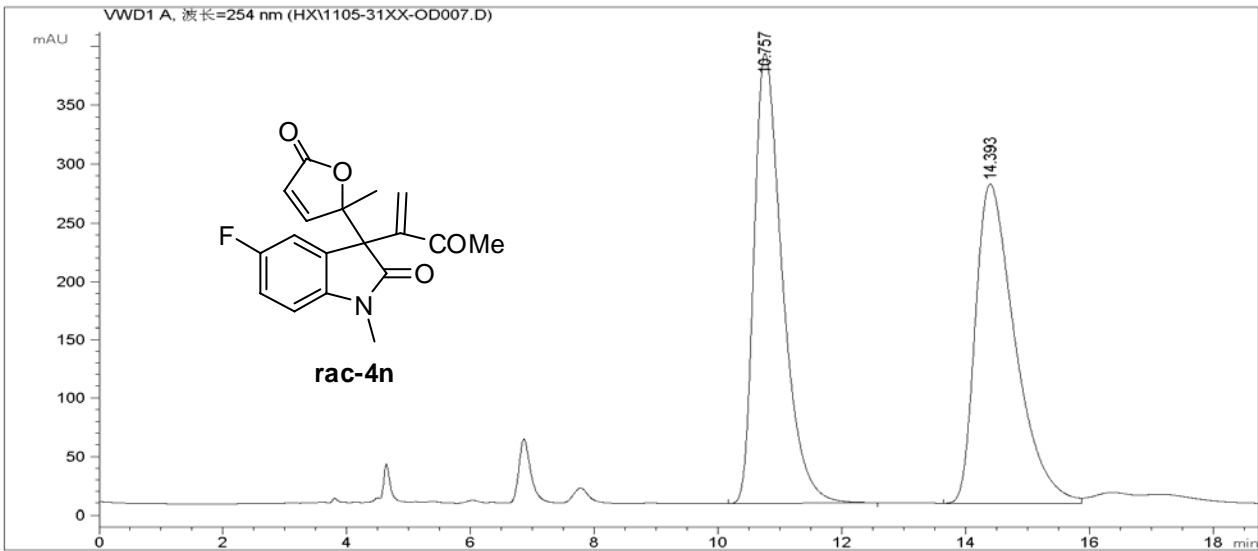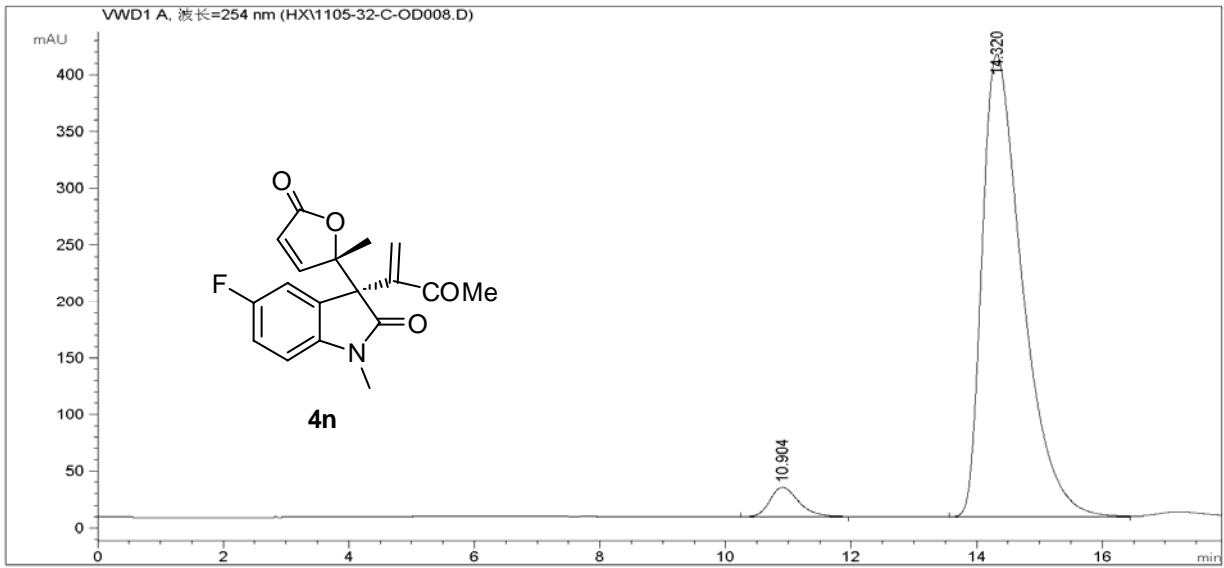

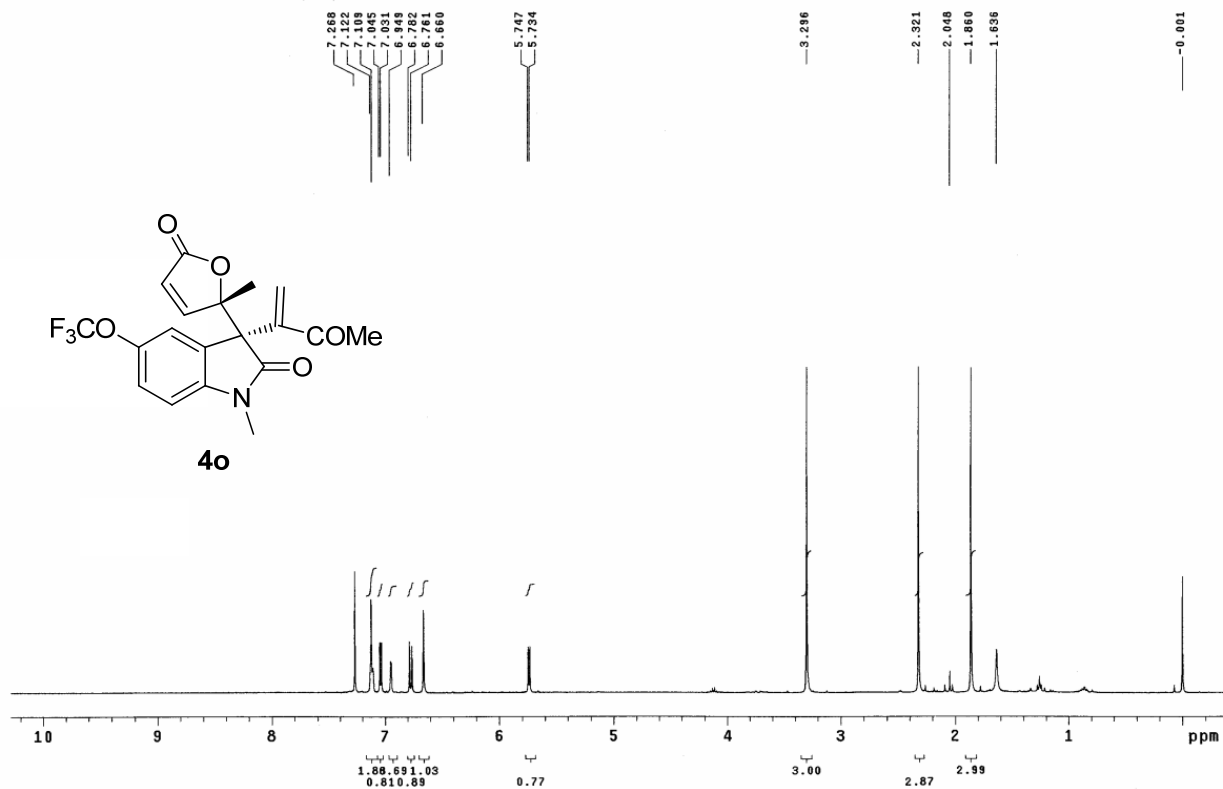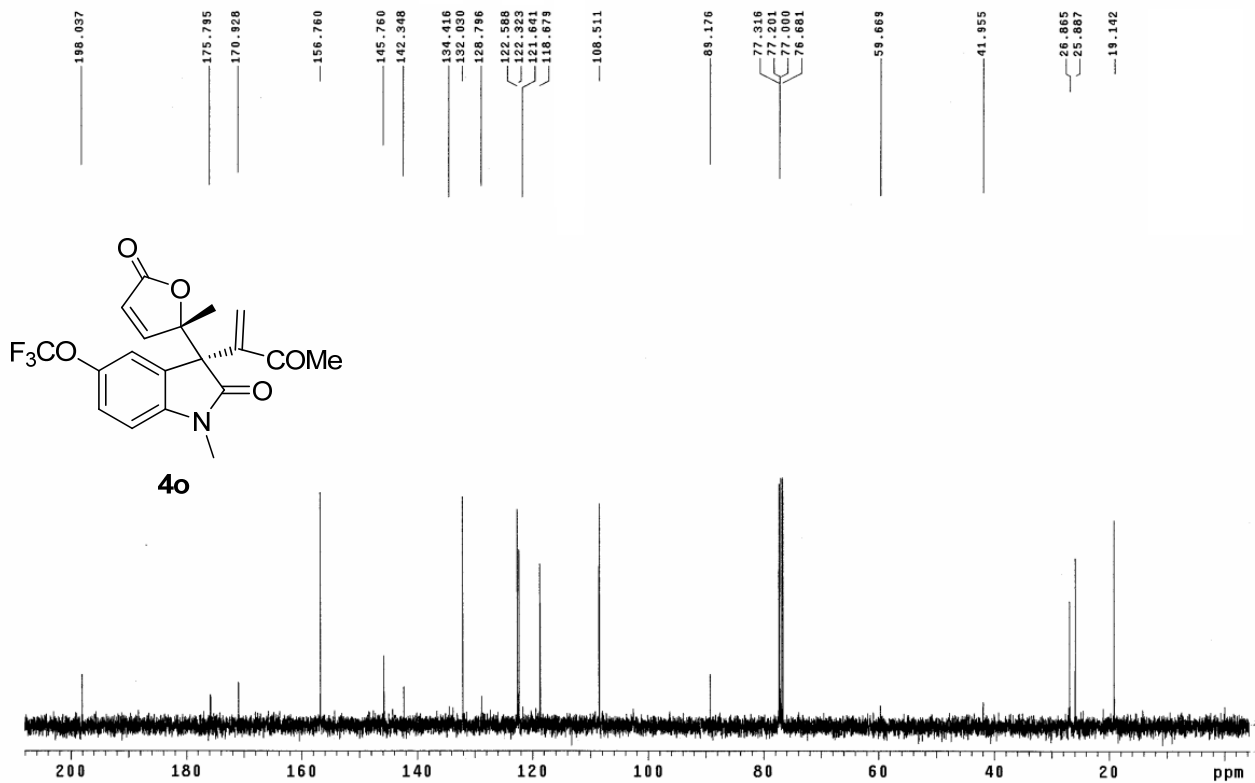

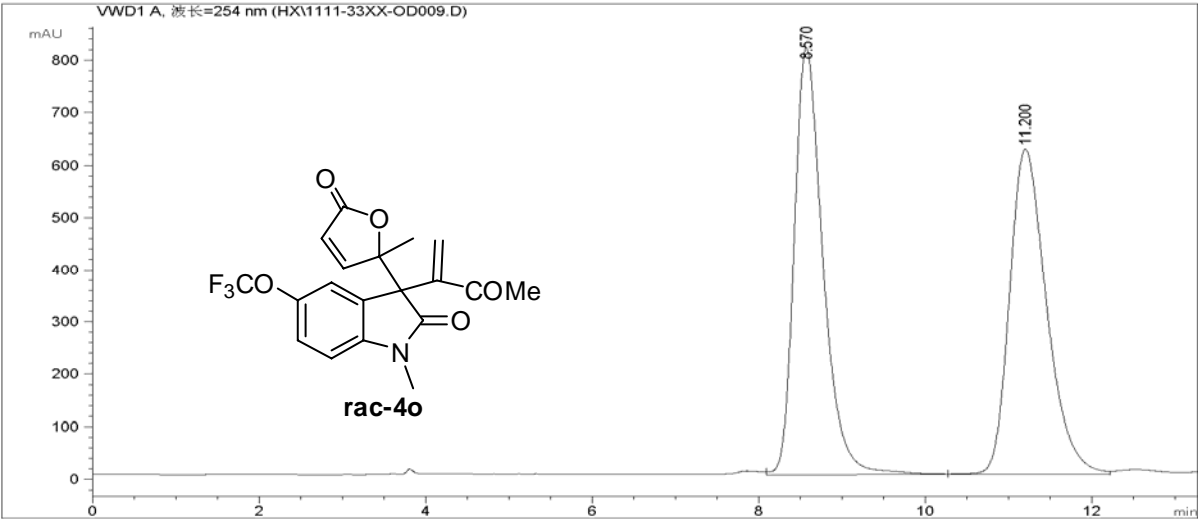

| 峰 # | 保留时间 [min] | 类型 | 峰宽 [min] | 峰面积 mAU *s | 峰高 [mAU]  | 峰面积 %   |
|-----|------------|----|----------|------------|-----------|---------|
| 1   | 8.570      | VV | 0.3675   | 1.95446e4  | 814.02753 | 50.3948 |
| 2   | 11.200     | VV | 0.4776   | 1.92384e4  | 621.59009 | 49.6052 |

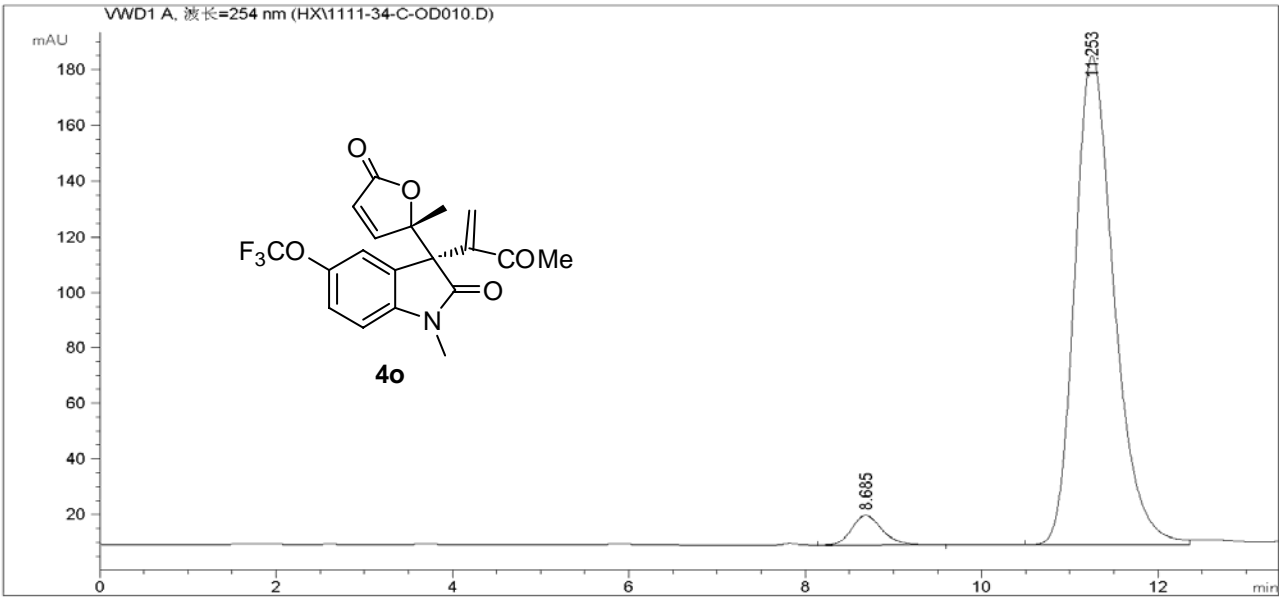

| 峰 # | 保留时间 [min] | 类型 | 峰宽 [min] | 峰面积 mAU *s | 峰高 [mAU]  | 峰面积 %   |
|-----|------------|----|----------|------------|-----------|---------|
| 1   | 8.685      | VB | 0.3699   | 257.98065  | 10.65350  | 4.5200  |
| 2   | 11.253     | EV | 0.4723   | 5449.52588 | 175.79794 | 95.4800 |

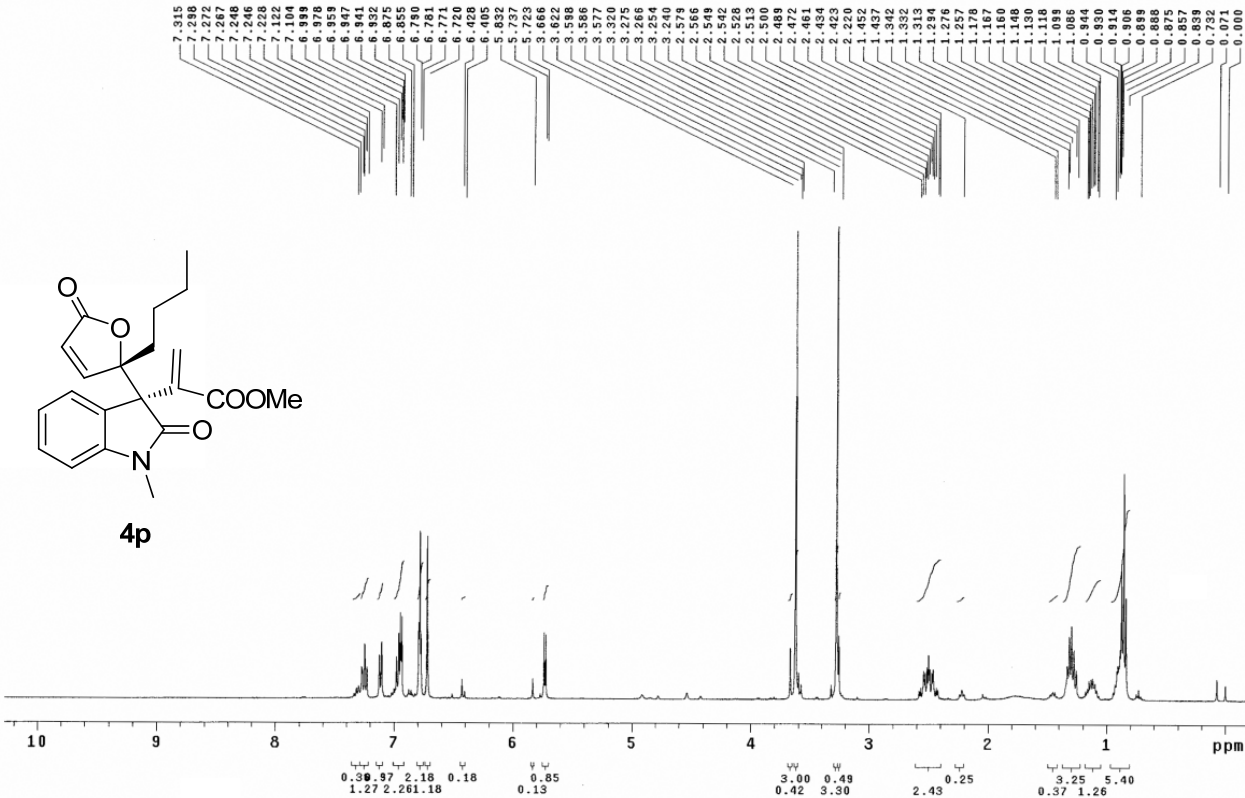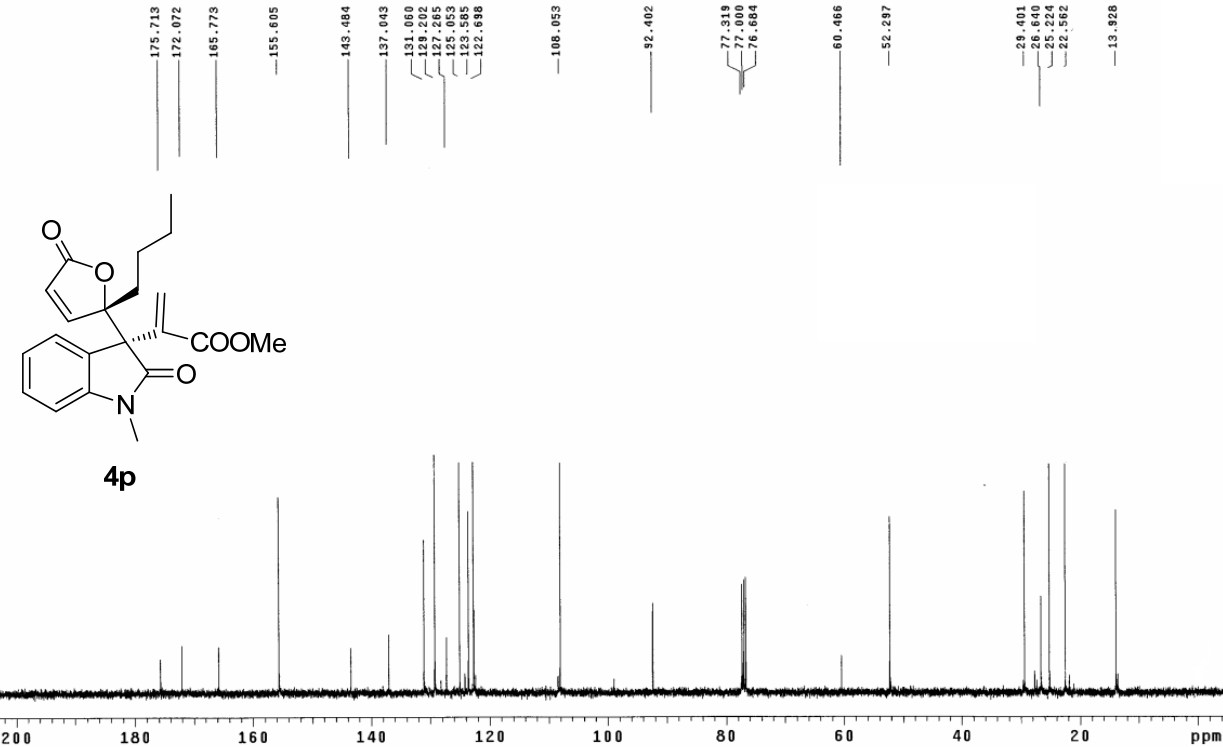

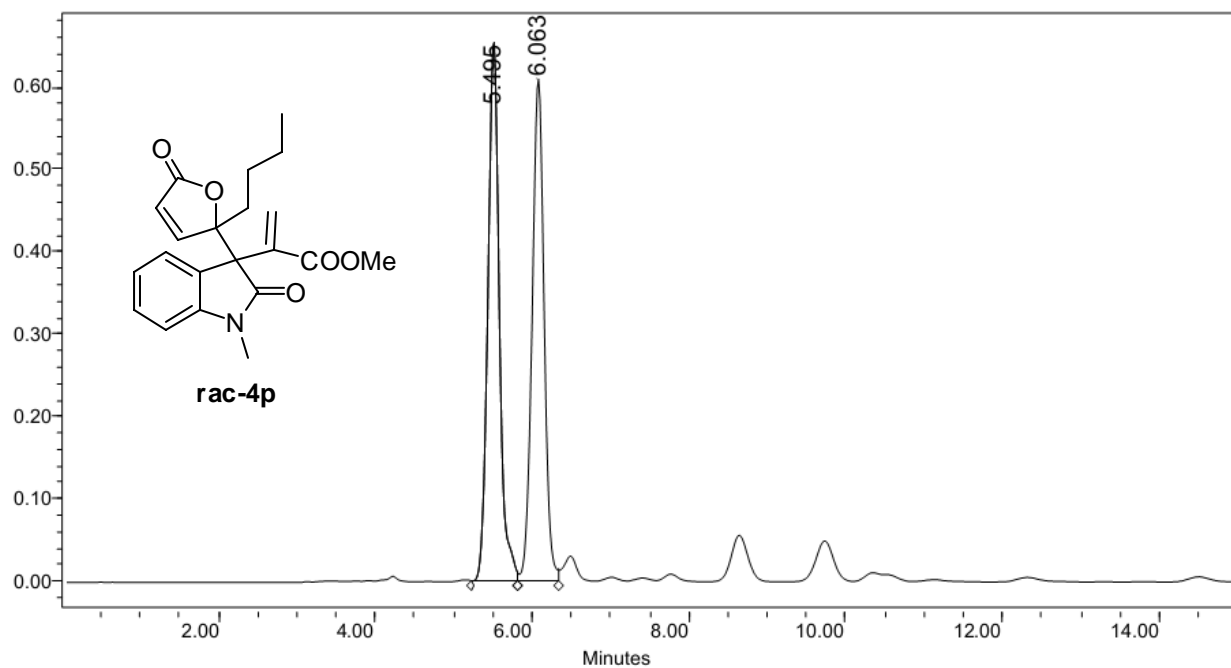

|   | RT<br>(min) | Area<br>( V *sec) | % Area | Height<br>( V ) | %<br>Height |
|---|-------------|-------------------|--------|-----------------|-------------|
| 1 | 5.495       | 6706061           | 50.81  | 656093          | 51.79       |
| 2 | 6.063       | 6491730           | 49.19  | 610637          | 48.21       |

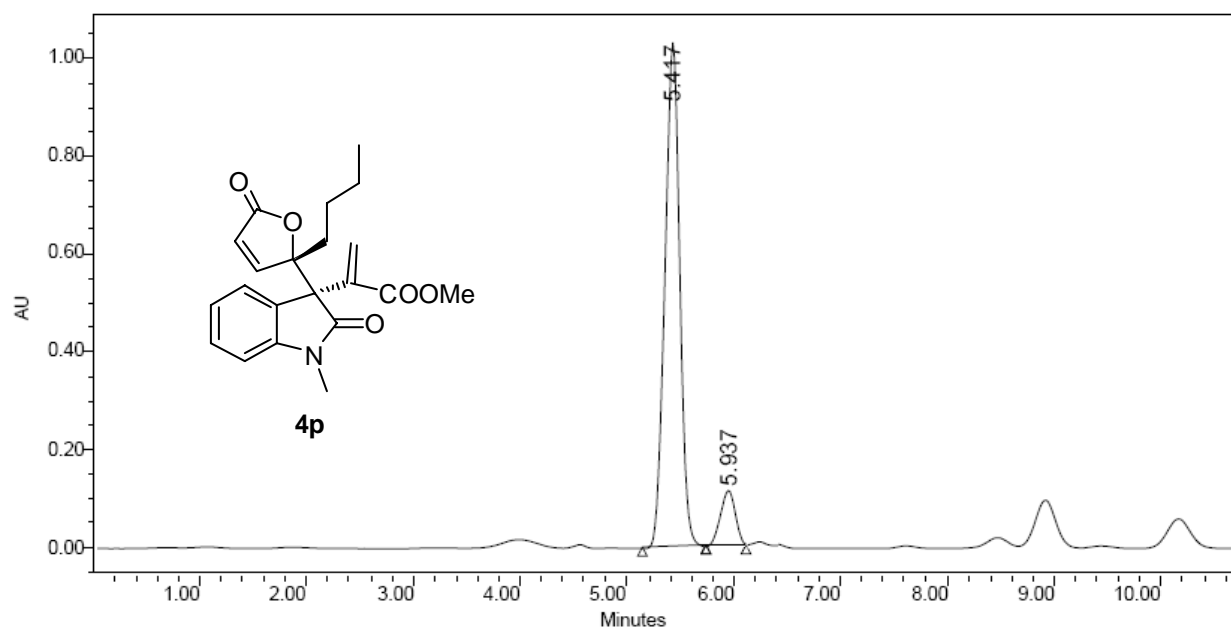

|   | RT<br>(min) | Area<br>( V *sec) | % Area | Height<br>( V ) | %<br>Height |
|---|-------------|-------------------|--------|-----------------|-------------|
| 1 | 5.417       | 9925478           | 89.82  | 1031136         | 90.01       |
| 2 | 5.937       | 1125530           | 10.18  | 114398          | 9.99        |

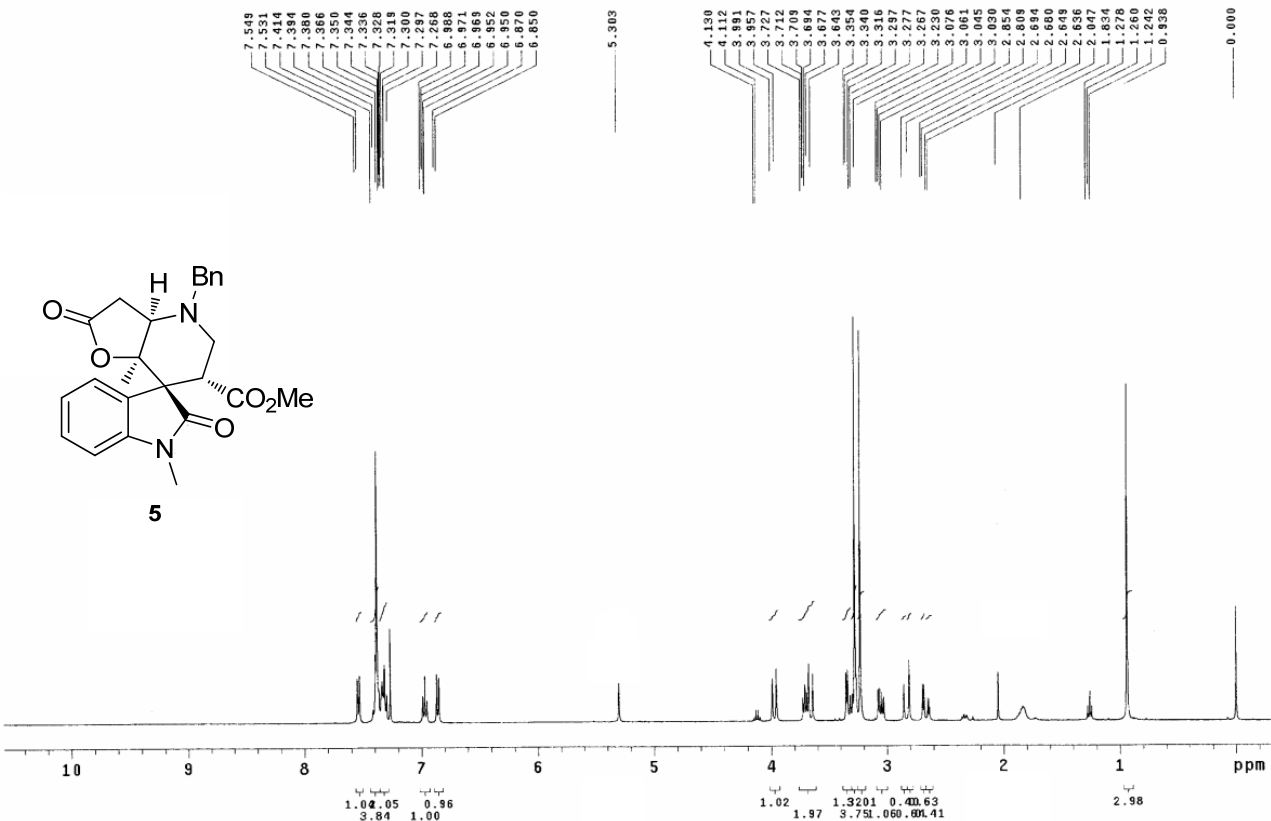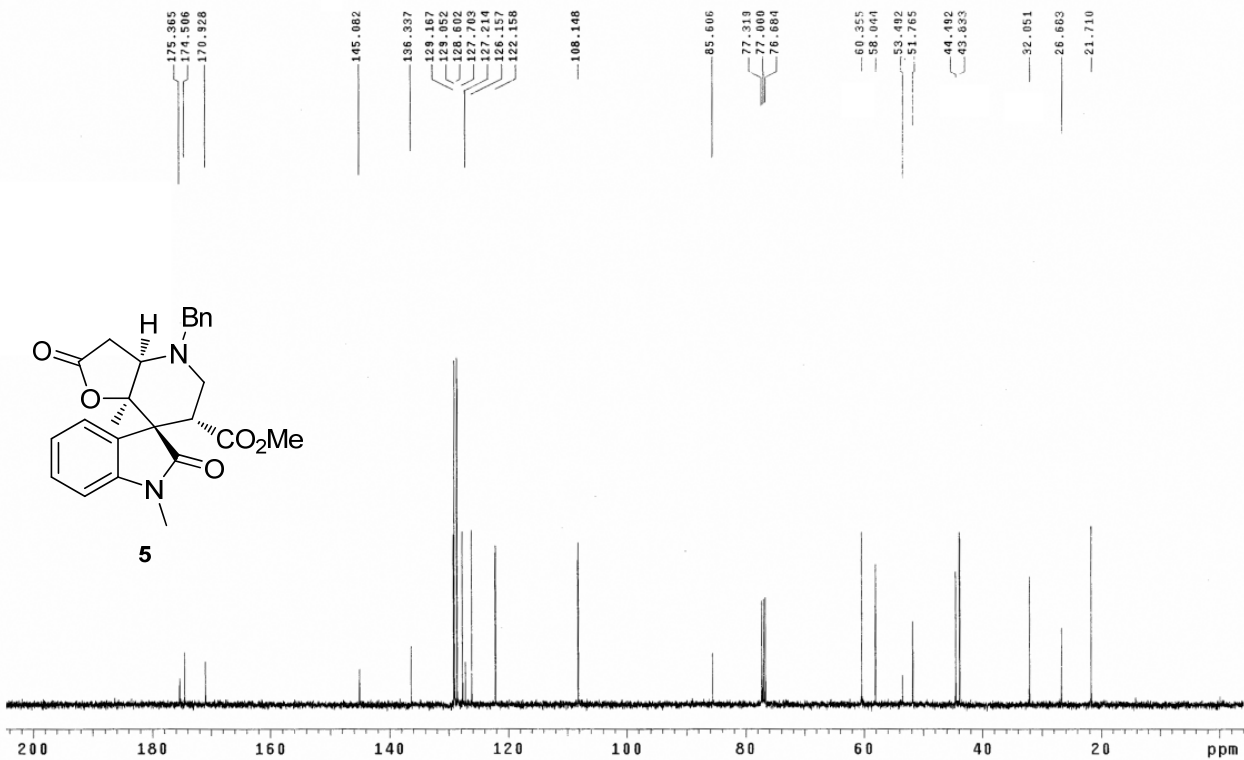



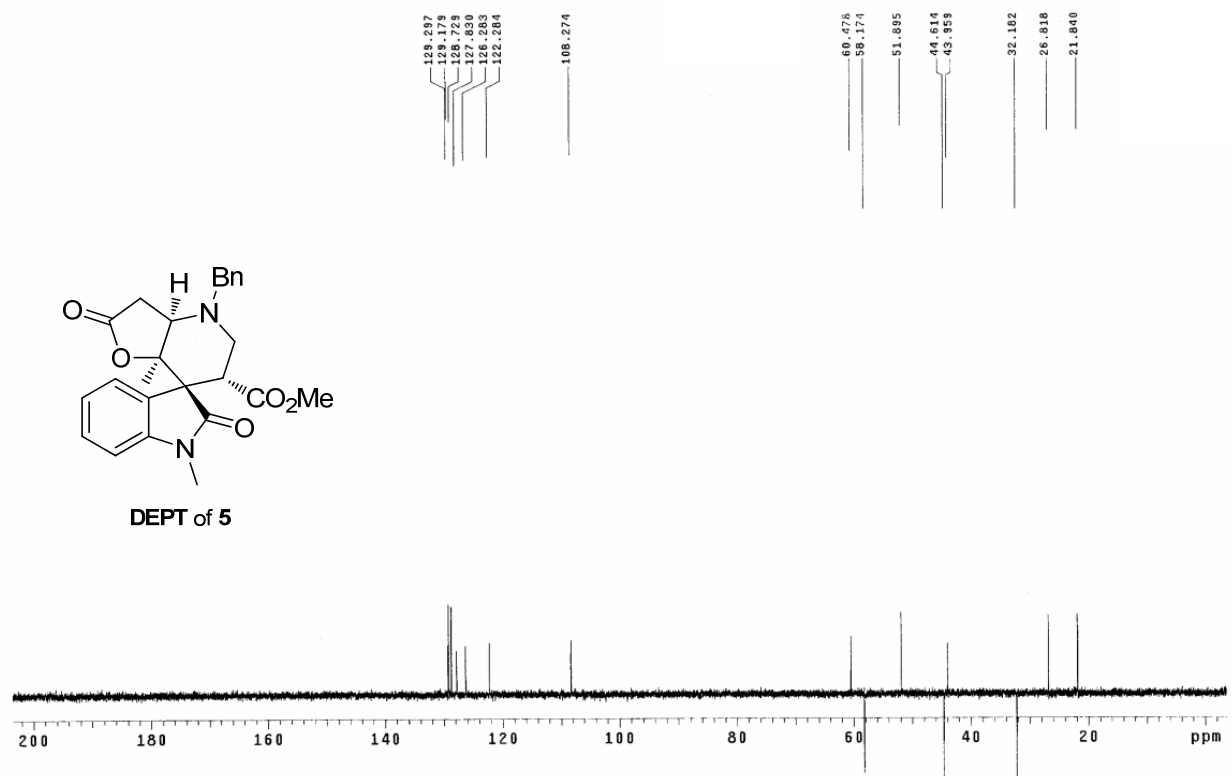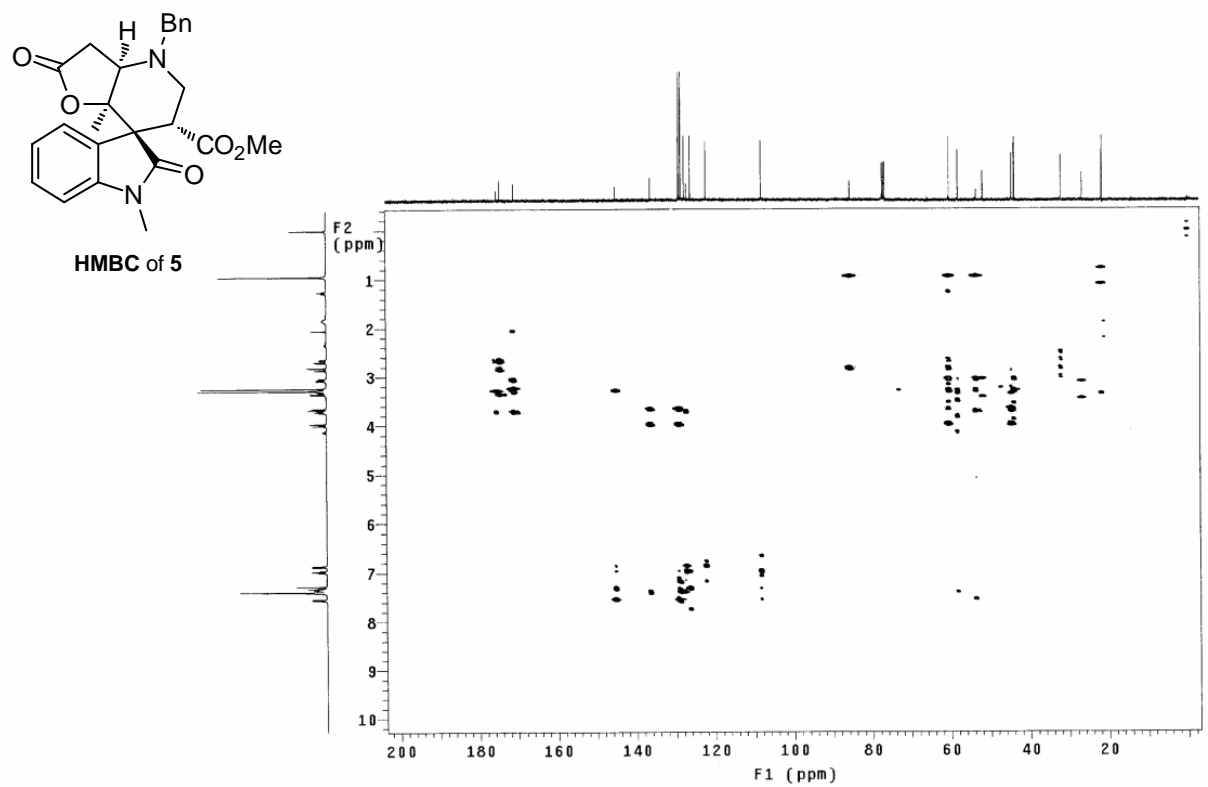

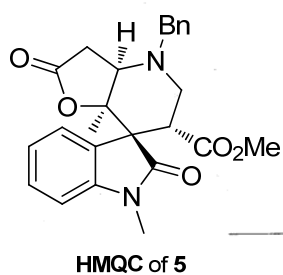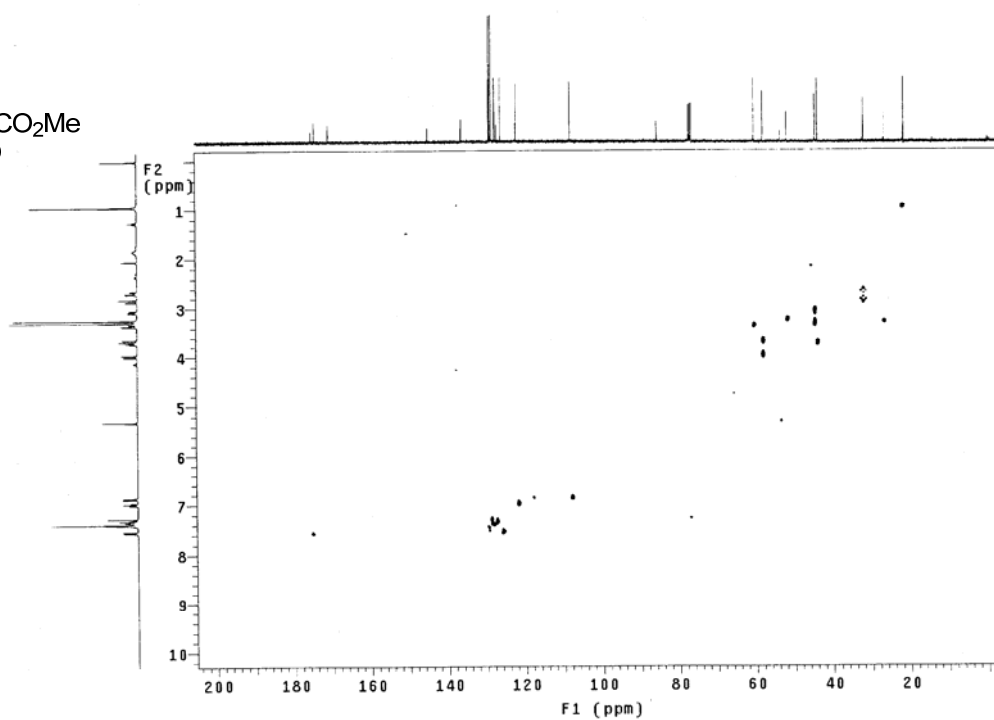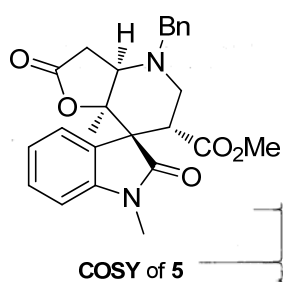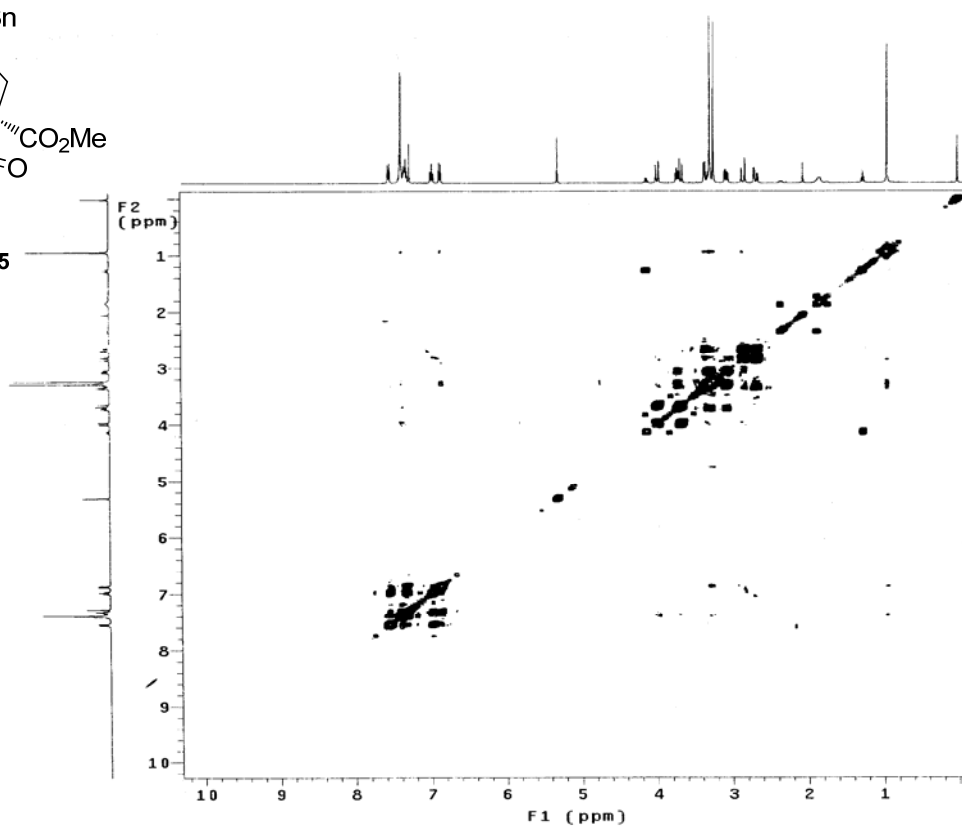

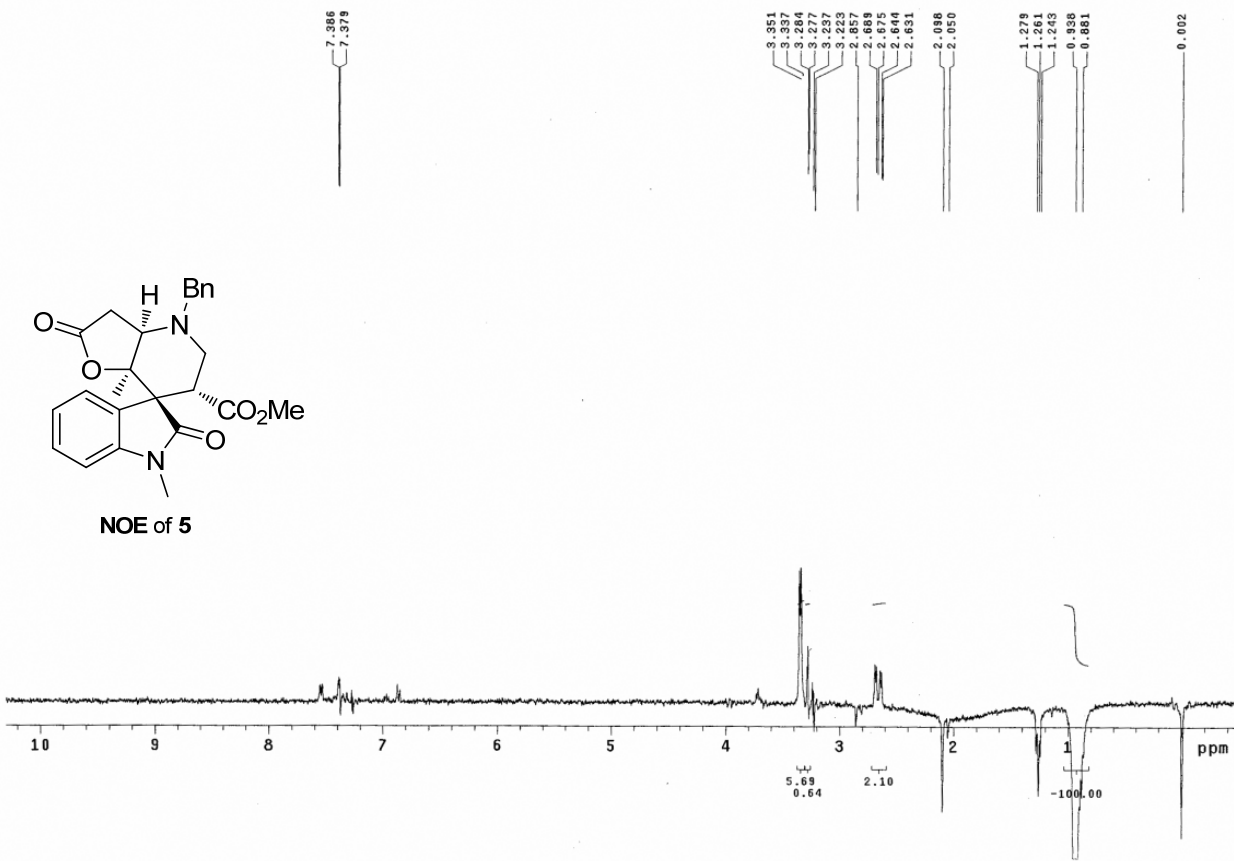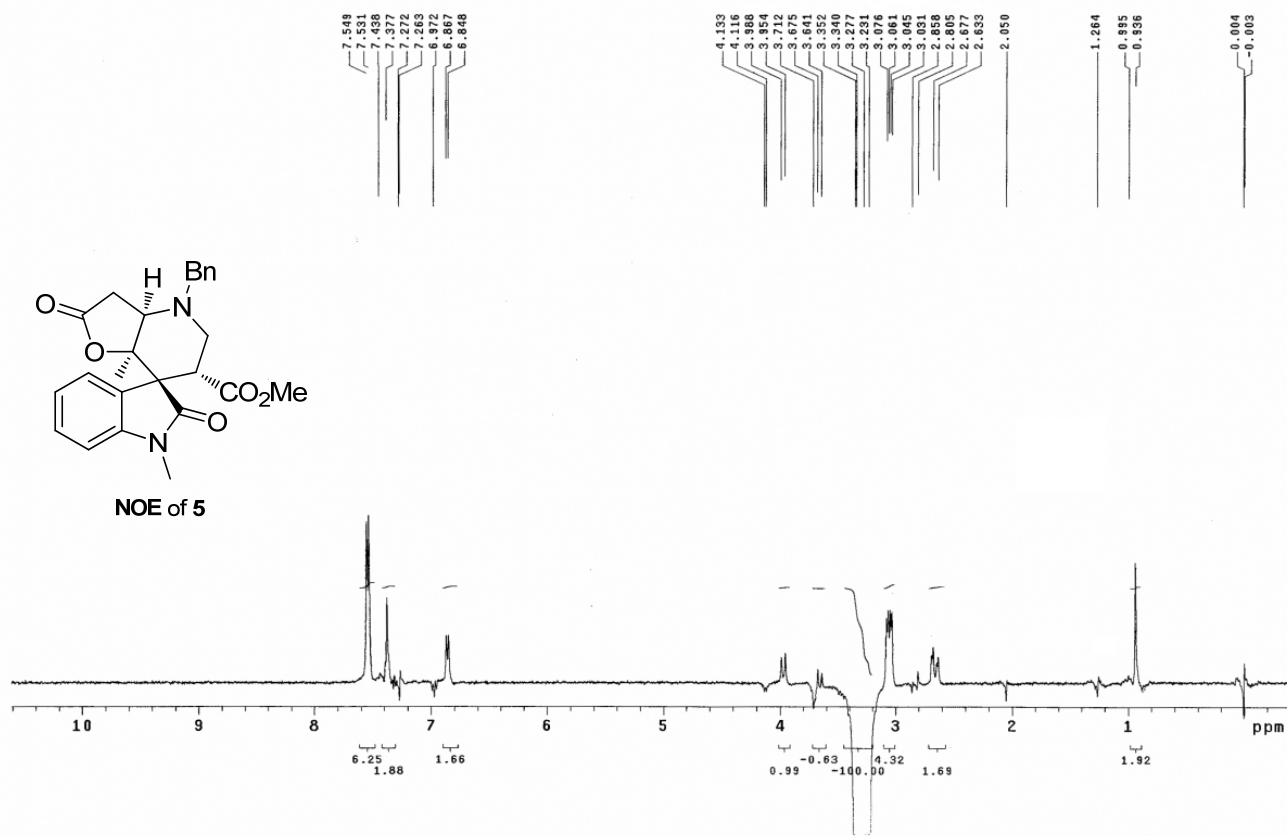

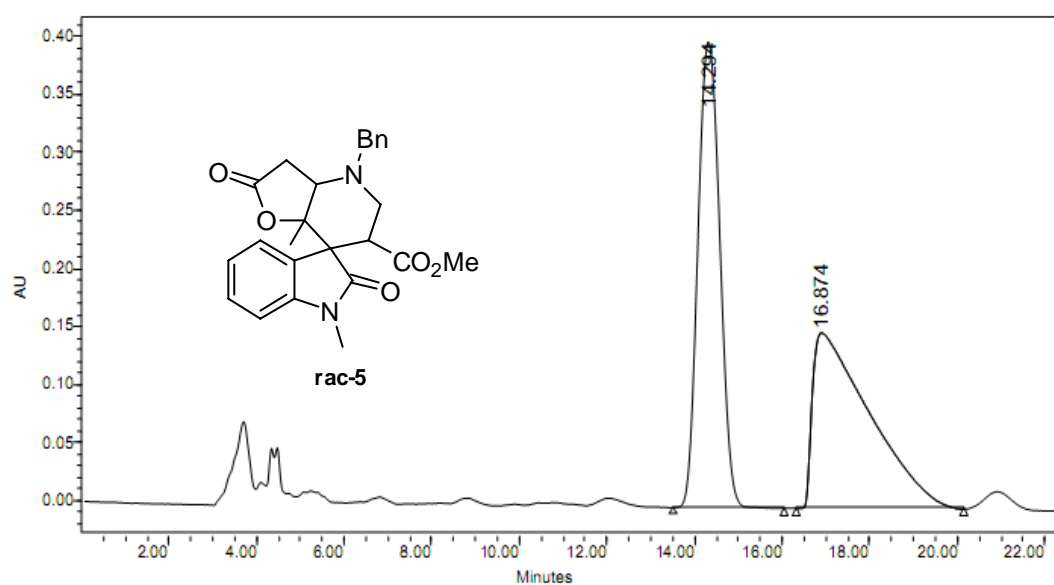

|   | RT<br>(min) | Area<br>(V *sec) | % Area | Height<br>(V) | %<br>Height |
|---|-------------|------------------|--------|---------------|-------------|
| 1 | 14.294      | 13922676         | 50.34  | 401200        | 72.60       |
| 2 | 16.874      | 13734645         | 49.66  | 151398        | 27.40       |

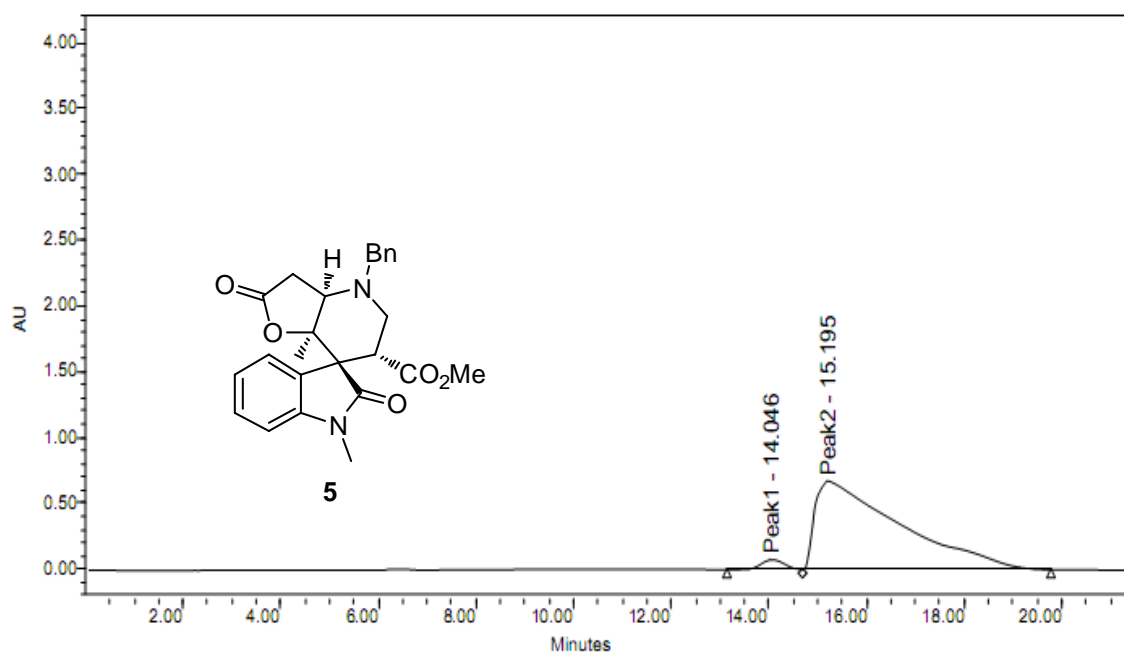

|   | RT<br>(min) | Area<br>(V *sec) | % Area | Height<br>(V) | %<br>Height |
|---|-------------|------------------|--------|---------------|-------------|
| 1 | 14.046      | 2559014          | 4.89   | 75837         | 13.92       |
| 2 | 15.195      | 49780074         | 95.11  | 469046        | 86.08       |

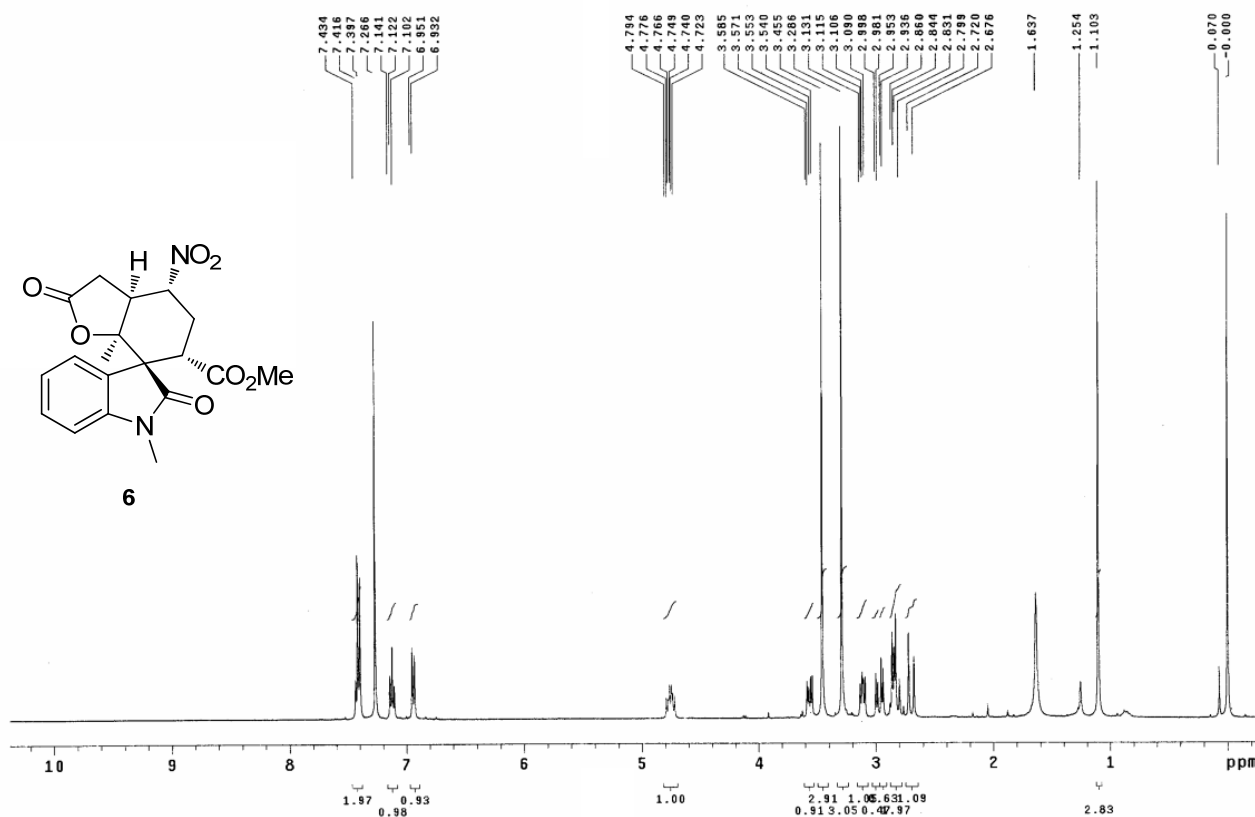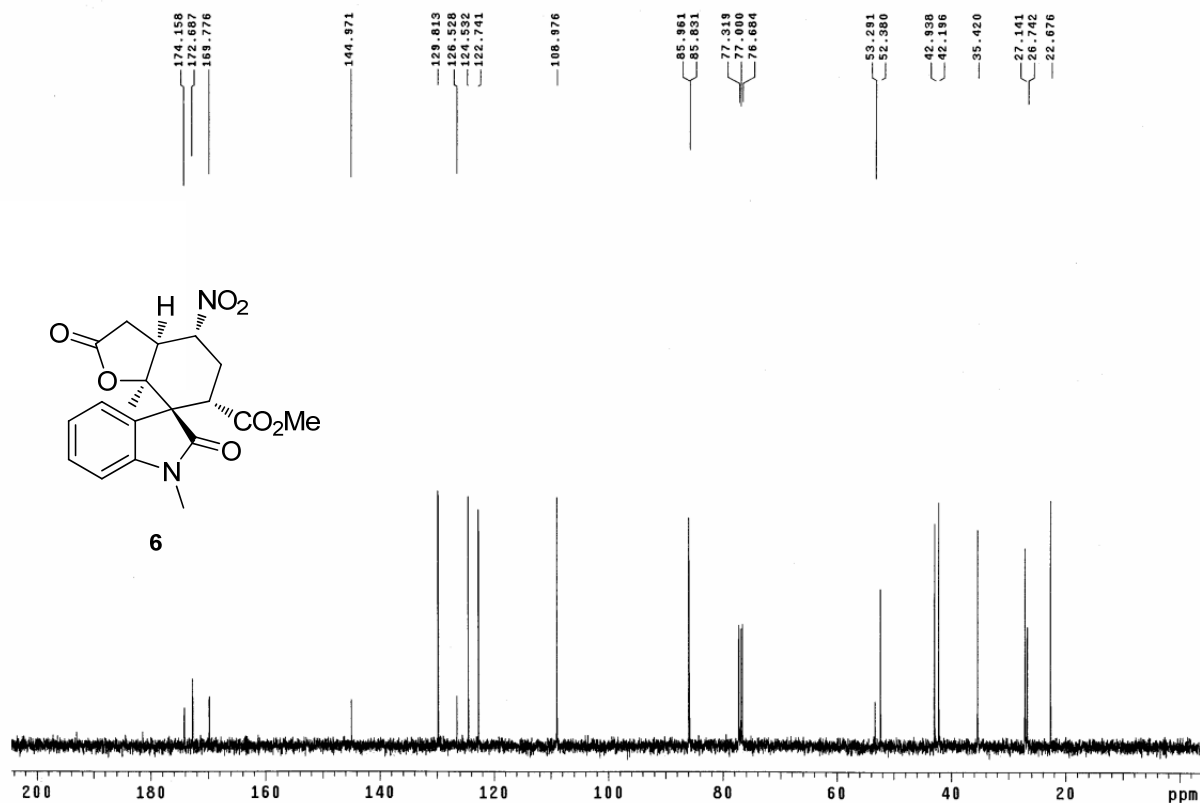

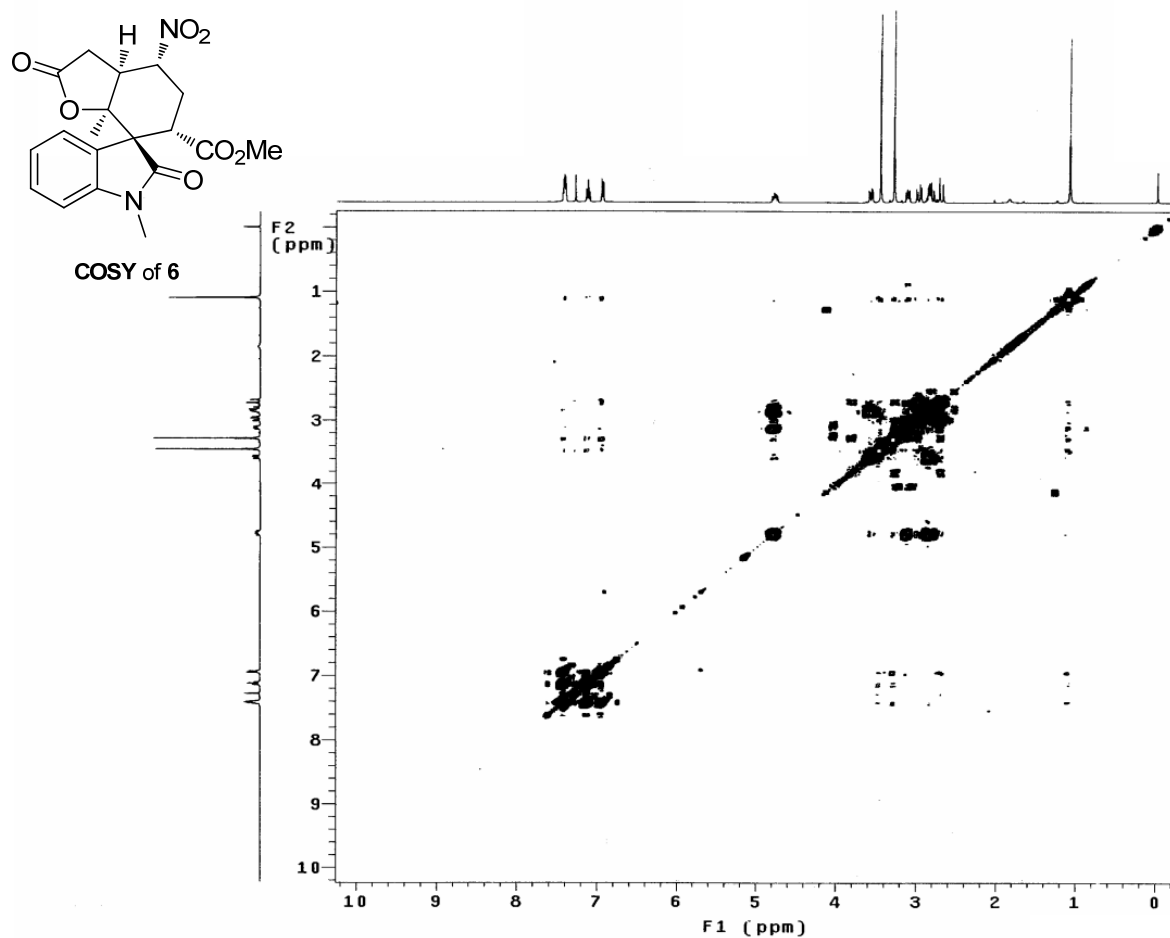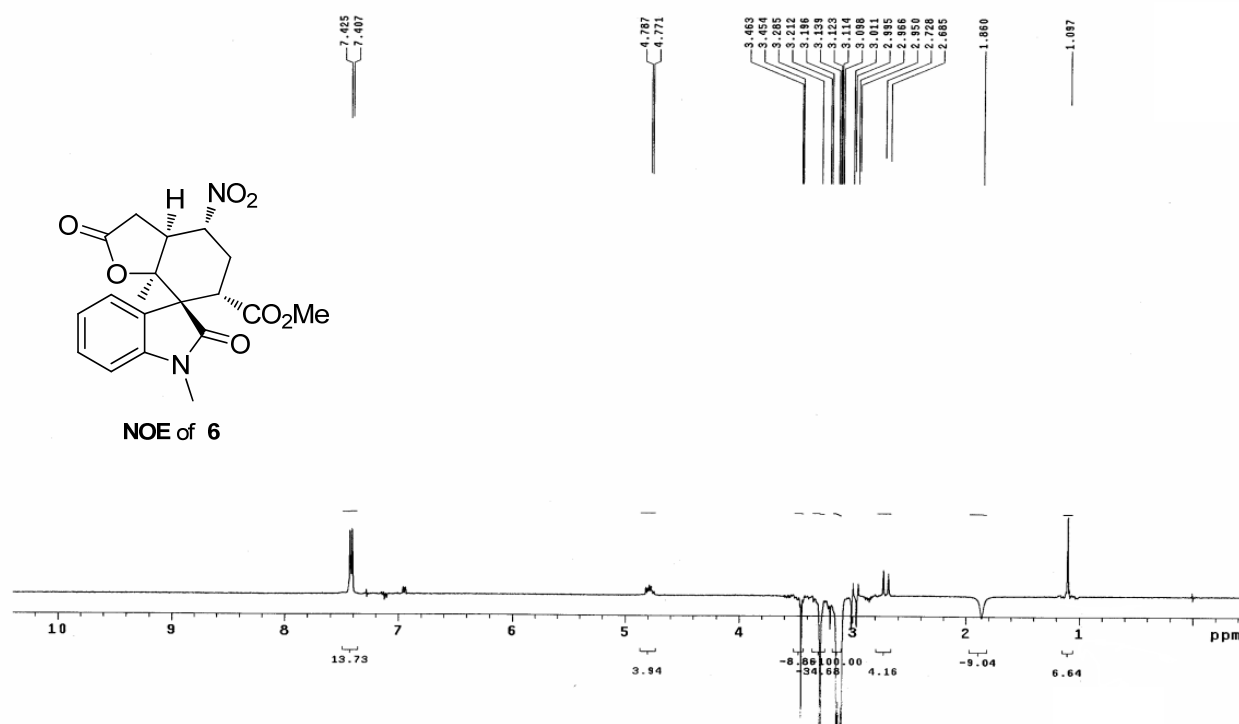

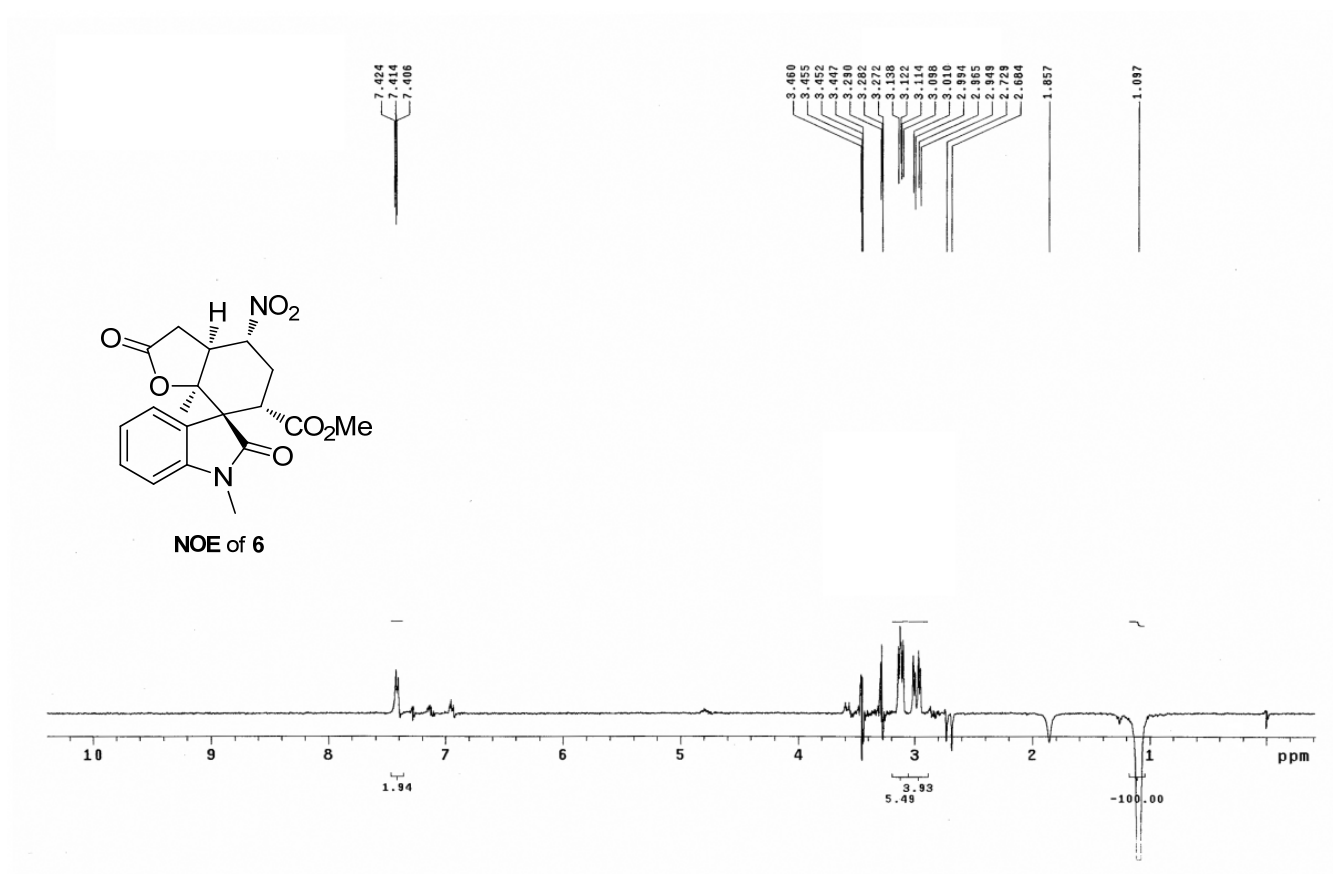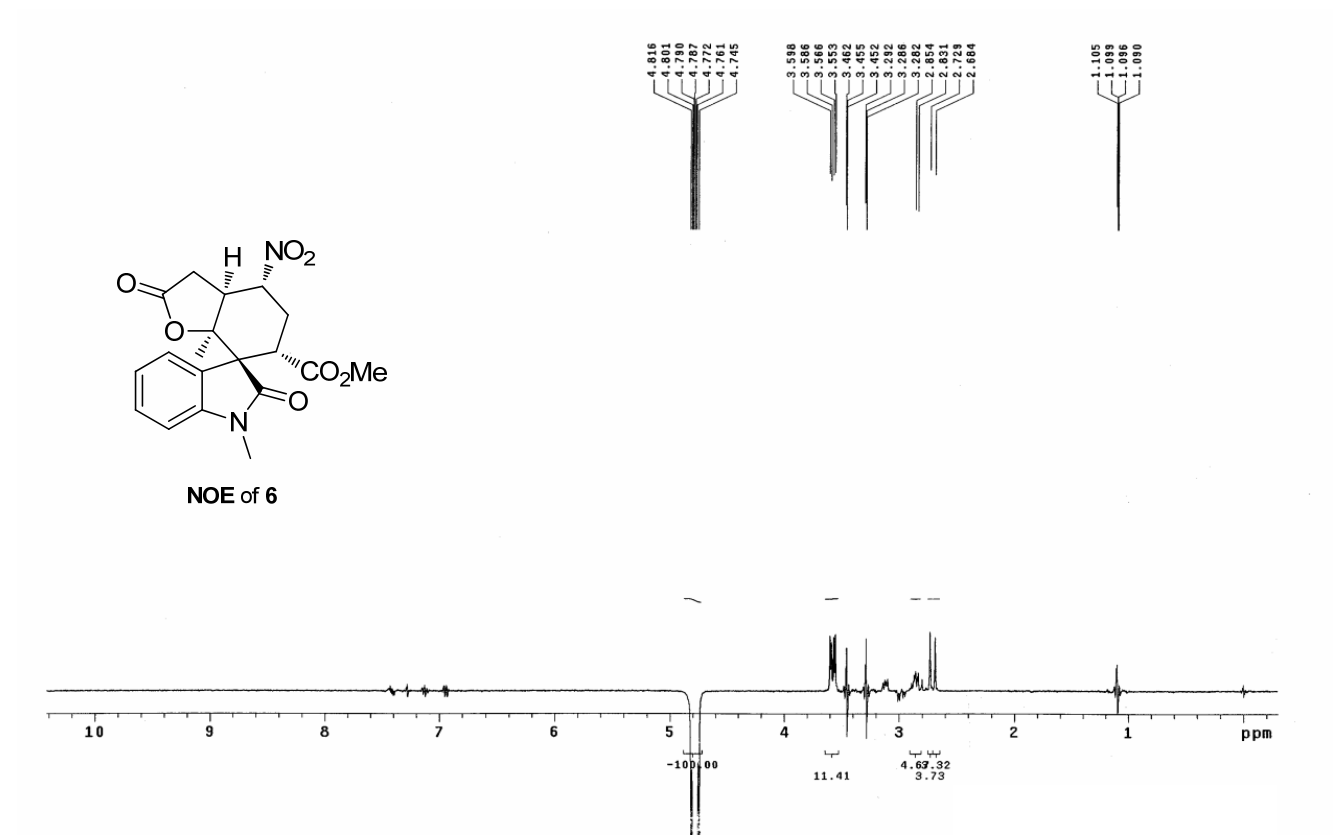

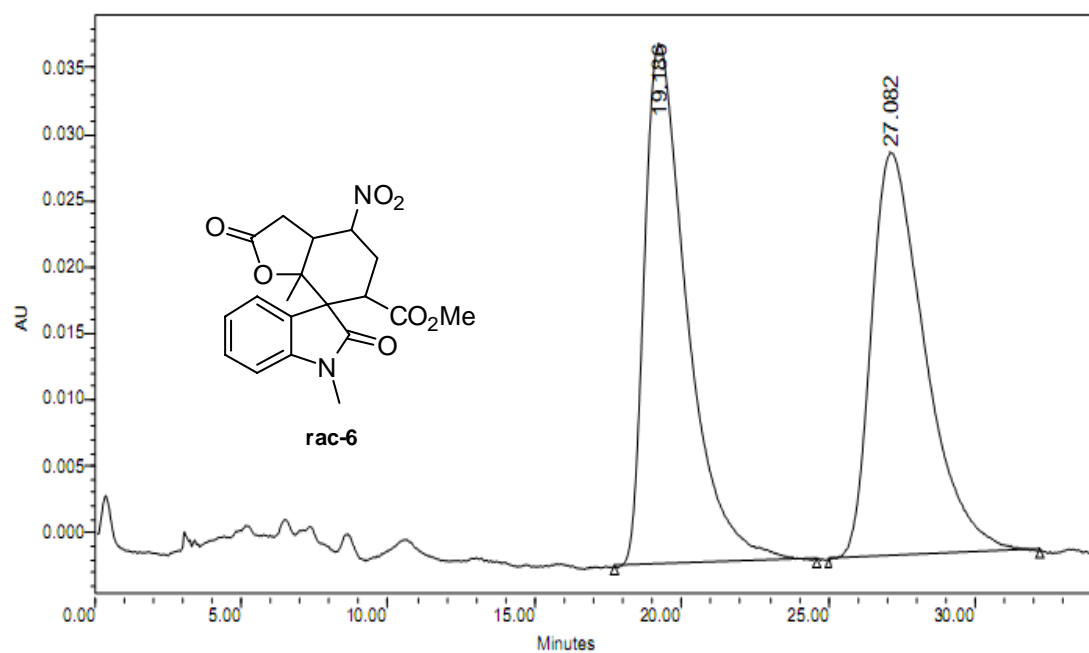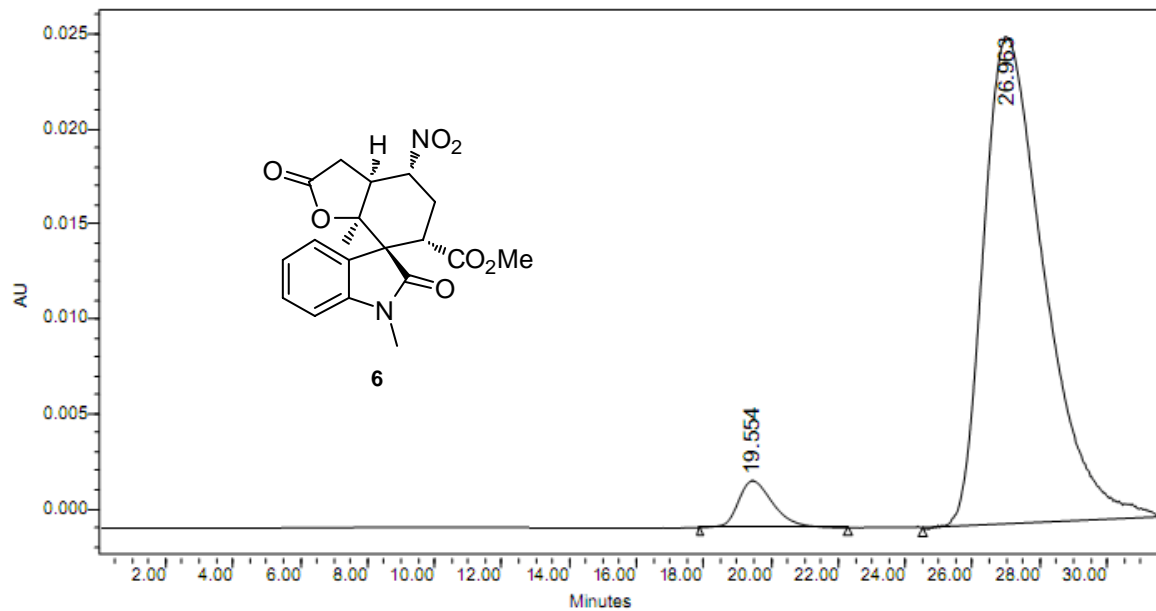



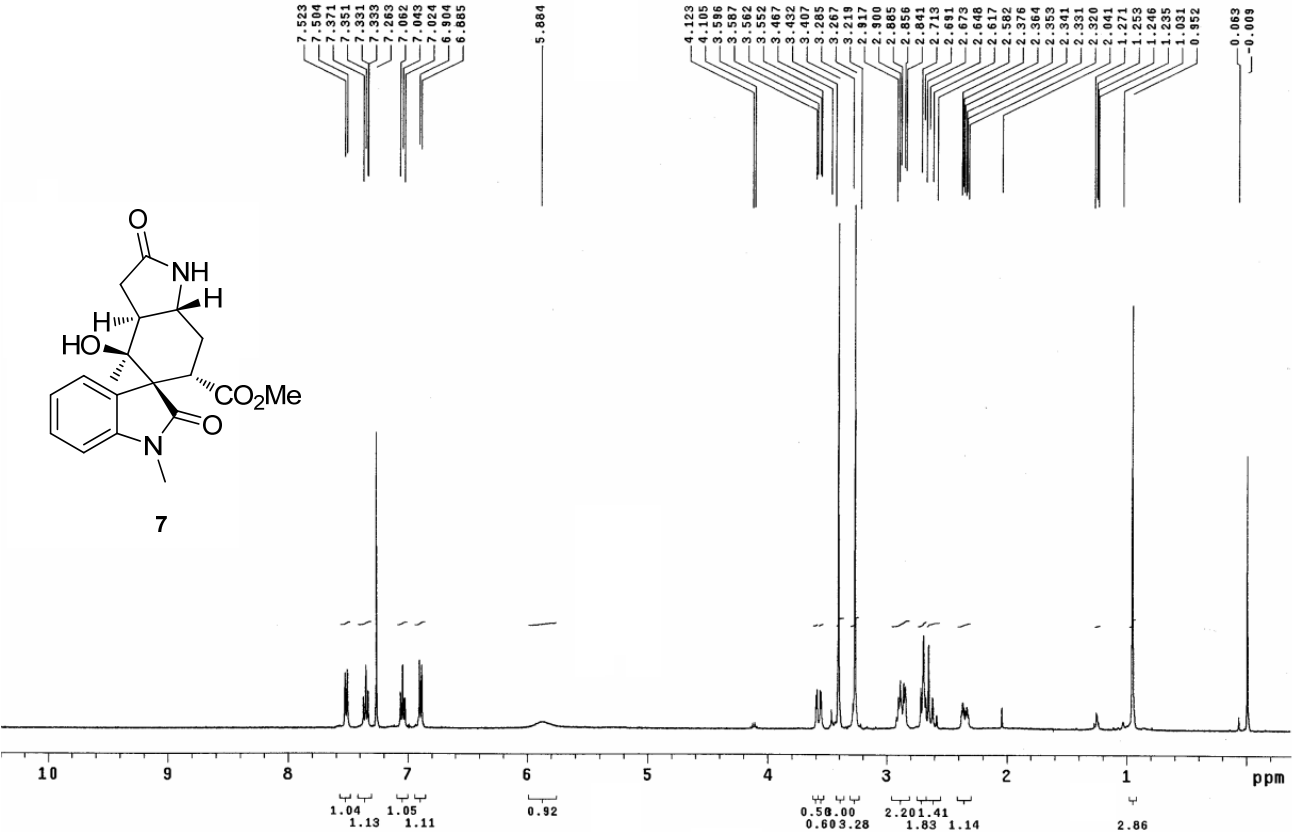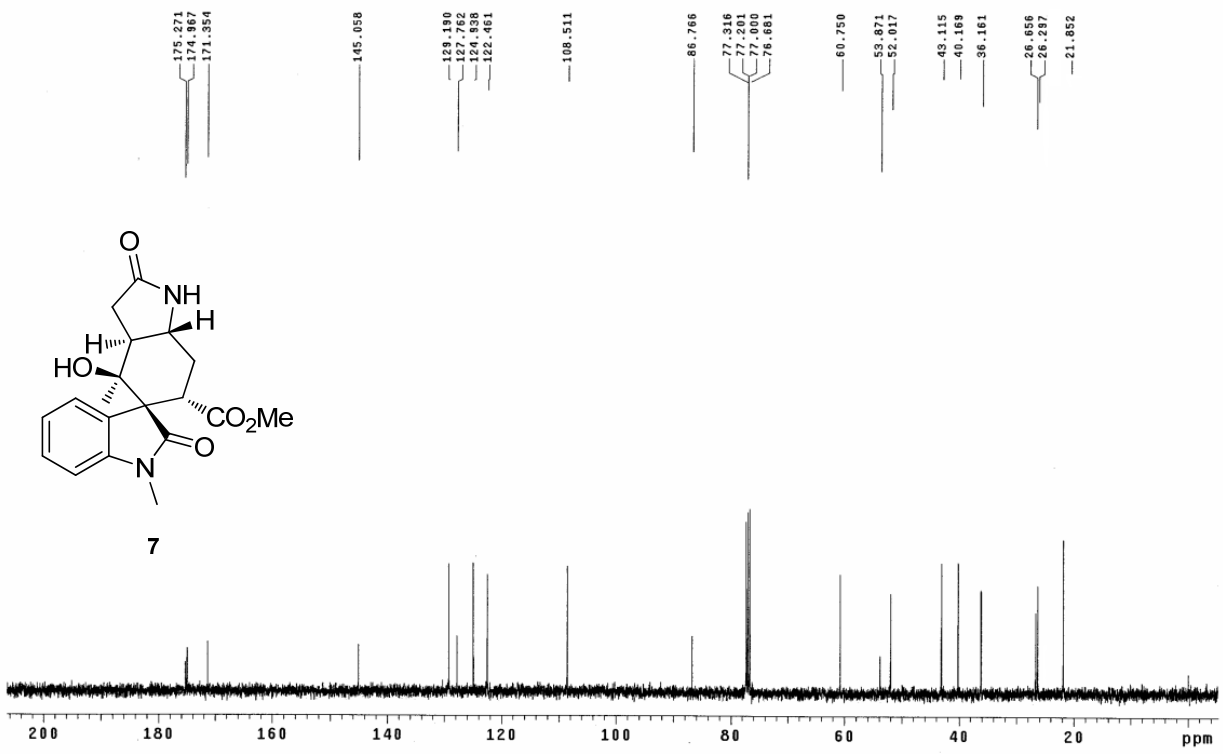

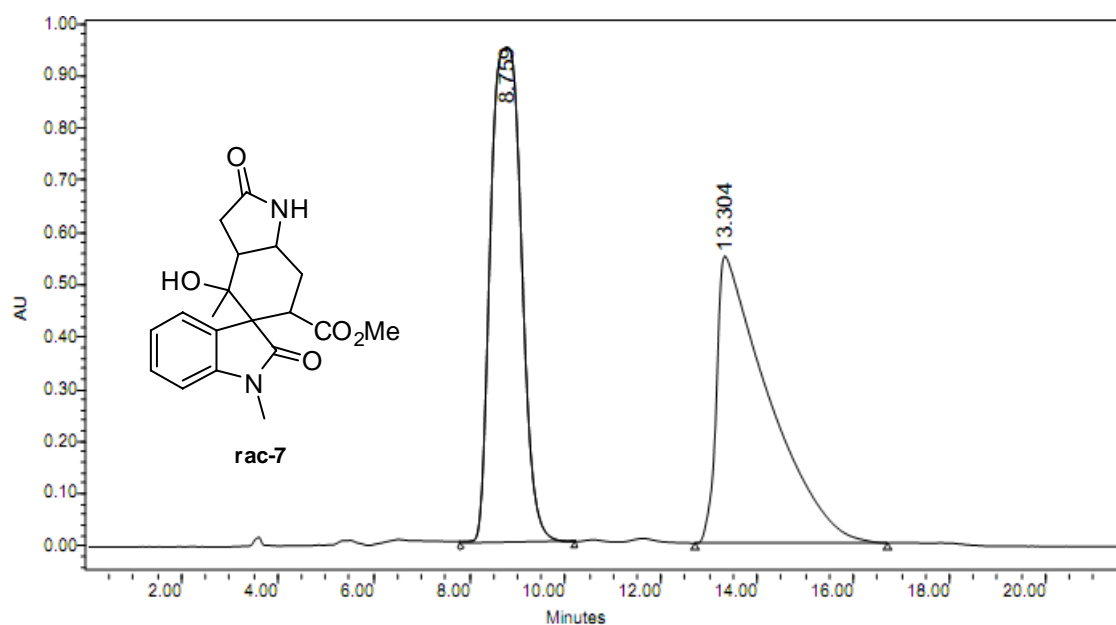

|   | RT<br>(min) | Area<br>(V *sec) | % Area | Height<br>(V) | %<br>Height |
|---|-------------|------------------|--------|---------------|-------------|
| 1 | 8.759       | 42530400         | 50.63  | 949708        | 63.34       |
| 2 | 13.304      | 41478430         | 49.37  | 549686        | 36.66       |

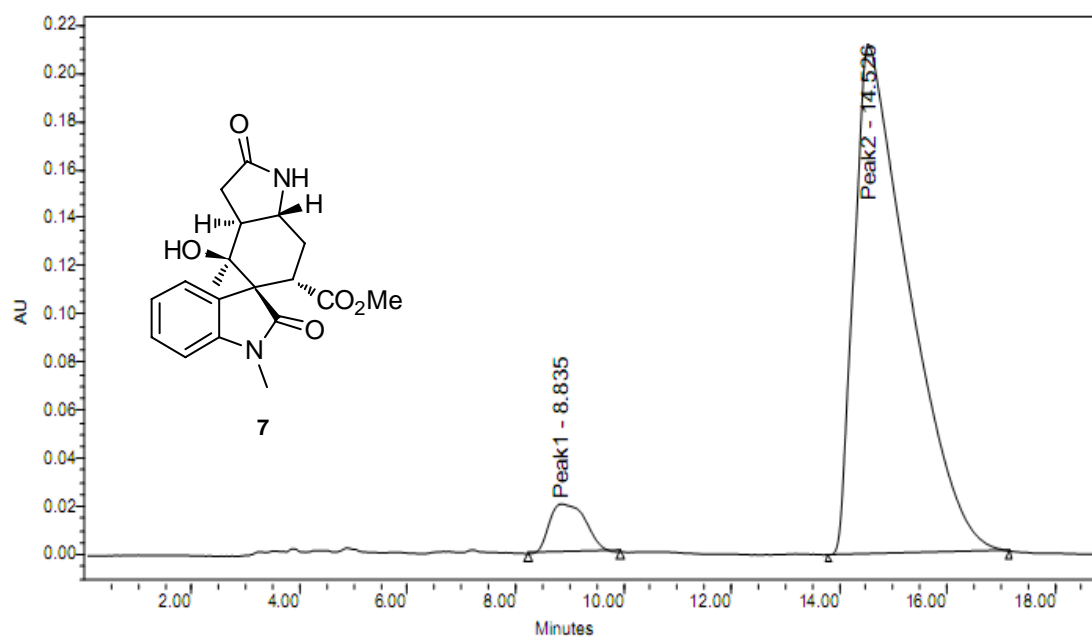

|   | RT<br>(min) | Area<br>(V *sec) | % Area | Height<br>(V) | %<br>Height |
|---|-------------|------------------|--------|---------------|-------------|
| 1 | 8.835       | 829175           | 5.27   | 18790         | 8.17        |
| 2 | 14.526      | 14914555         | 94.73  | 211273        | 91.83       |
